# Supplementary material for: Spatiotemporal dynamics of Mycobacterium Tuberculosis in Oman
Source: Research Square preprint supplement (doi:10.21203/rs.3.rs-7400763/v1), 2025-09-29
Supplement: Supplementary file 1 [file 0b1962117e12e7ea6e12a4cf.xlsx]

## Sheet: Result
Fst	Om&non
2008	0.0084
2009	-0.0036
2010	-0.0139
2011	-0.0085
2012	-0.0026
2013	0.0134
2014	-0.0056
2015	0.005
2016	-0.0208
2017	-0.0113
2018	0.025

## Sheet: All data
Year	Sample Id	Nationality	MIRU2	MIRU27	MIRU24	MTUB29	MIRU4	ETRB	MIRU39	MIRU23	MIRU40	MTUB30	MIRU10	MIRU16	MTUB39	MIRU26	MIRU20	MIRU31	MTUB21
2008	1	Non-Omani,	504	643	491	445	475	632	636	360	460	366	590	719	562	537	584	645	147
2008	2	Omani,	504	591	439	445	475	461	636	463	460	308	590	719	446	537	584	645	147
2008	3	Non-Omani,	504	643	439	559	550	686	636	410	408	480	590	719	446	537	584	645	90
2008	4	Non-Omani,	504	643	439	559	320	461	636	205	460	250	741	666	388	333	584	645	258
2008	5	Non-Omani,	504	643	491	392	550	575	584	463	460	366	690	719	388	384	584	704	315
2008	6	Non-Omani,	504	643	384	445	550	461	636	463	511	424	741	666	562	333	584	645	315
2008	7	Non-Omani,	504	643	330	502	166	404	636	410	511	366	590	719	0	384	584	645	205
2008	8	Omani,	504	643	439	502	320	461	688	410	511	366	847	772	388	435	584	757	315
2008	9	Omani,	504	643	491	502	475	575	584	463	511	366	690	0	330	384	584	645	258
2008	10	Non-Omani,	504	643	439	502	398	461	688	410	511	424	0	825	446	435	584	535	90
2008	11	Non-Omani,	504	643	439	502	320	461	688	410	460	424	794	772	446	435	584	757	315
2008	12	Non-Omani,	504	643	439	559	475	461	688	410	460	424	640	719	330	384	584	757	258
2008	13	Non-Omani,	452	643	439	445	320	404	584	360	677	366	690	719	388	537	430	0	258
2008	14	Omani,	504	643	439	445	320	461	636	410	408	538	640	719	562	485	584	645	258
2008	15	Omani,	452	694	439	559	320	461	636	311	623	308	690	719	562	537	584	535	258
2008	16	Omani,	504	643	330	392	320	461	688	410	353	424	847	772	0	537	584	757	315
2008	17	Omani,	504	0	439	445	320	461	636	311	511	424	741	0	0	537	507	645	205
2008	18	Omani,	504	643	439	445	320	461	688	410	511	308	741	772	388	435	584	757	147
2008	19	Omani,	504	643	491	502	550	575	636	463	460	480	690	719	446	384	584	0	429
2008	20	Omani,	504	643	439	392	320	461	636	463	511	366	690	719	446	537	584	645	147
2008	21	Omani,	0	643	491	502	166	575	584	360	511	366	690	719	0	384	584	757	315
2008	22	Non-Omani,	504	643	439	445	166	575	0	463	353	192	640	719	388	537	584	0	90
2008	23	Non-Omani,	504	643	491	502	320	632	584	463	511	480	794	666	504	384	584	757	258
2008	24	Non-Omani,	504	643	439	559	320	461	688	410	460	424	794	772	446	642	584	757	372
2008	25	Omani,	504	643	439	559	550	461	688	410	511	424	741	772	446	642	584	0	824
2008	26	Omani,	504	591	439	445	320	461	636	258	565	424	537	666	446	537	584	645	205
2008	27	Omani,	504	643	491	502	550	575	688	516	460	366	690	719	446	384	584	757	315
2008	28	Omani,	504	643	491	392	320	461	688	410	460	366	0	772	330	591	584	645	90
2008	29	Omani,	504	643	439	392	550	461	688	410	511	424	900	772	446	642	584	757	205
2008	30	Non-Omani,	504	643	491	502	550	575	688	463	460	366	690	719	446	384	430	810	205
2008	31	Non-Omani,	504	643	491	502	475	686	636	569	460	366	690	719	388	384	584	704	653
2008	32	Non-Omani,	504	540	491	502	320	461	688	463	511	366	690	772	446	384	430	592	429
2008	33	Non-Omani,	452	643	439	445	320	461	636	463	460	424	690	719	504	537	584	535	258
2008	34	Non-Omani,	504	643	439	559	320	461	688	410	511	424	590	772	446	537	584	757	315
2008	35	Non-Omani,	504	643	491	502	550	177	688	463	565	424	690	0	562	384	584	645	429
2008	36	Non-Omani,	504	643	439	559	320	461	688	410	511	424	794	719	446	537	584	757	205
2008	37	Non-Omani,	504	643	439	445	320	461	636	410	408	480	640	666	446	485	584	645	429
2008	38	Non-Omani,	504	540	491	502	398	575	740	463	460	424	690	719	388	333	661	757	653
2008	39	Non-Omani,	504	643	491	502	475	404	584	311	565	308	0	719	446	384	584	757	429
2008	40	Non-Omani,	504	643	439	392	166	461	688	410	460	424	794	772	330	642	584	757	315
2008	41	Non-Omani,	504	643	439	559	320	461	584	410	565	424	741	666	446	333	584	592	258
2008	42	Non-Omani,	504	643	491	346	320	575	688	463	460	308	640	719	388	384	584	757	315
2008	43	Non-Omani,	504	591	439	392	166	177	636	410	565	480	690	719	446	333	584	704	205
2008	44	Non-Omani,	504	643	439	502	320	461	688	410	565	424	741	0	446	485	584	757	90
2008	45	Non-Omani,	504	643	491	392	245	575	688	516	460	308	690	719	446	384	584	704	258
2008	46	Non-Omani,	504	643	491	502	550	575	688	516	460	480	690	719	330	384	584	0	315
2008	47	Non-Omani,	504	643	439	346	550	461	688	410	511	424	794	772	330	435	584	757	315
2008	48	Non-Omani,	452	643	439	559	320	461	636	463	565	366	640	0	446	537	584	592	258
2008	49	Non-Omani,	0	643	0	502	320	461	636	516	511	480	690	0	0	384	0	0	490
2008	50	Non-Omani,	452	643	439	559	320	461	688	311	511	424	0	772	446	537	584	757	315
2008	51	Non-Omani,	504	643	491	392	166	461	688	463	460	424	640	0	446	537	584	757	372
2008	52	Non-Omani,	452	643	0	559	166	461	584	463	677	424	690	719	388	537	0	757	315
2008	53	Non-Omani,	504	643	439	502	320	461	688	205	511	366	794	772	388	537	430	757	315
2008	54	Non-Omani,	504	643	491	289	550	575	688	463	353	424	0	719	388	384	584	757	147
2008	55	Non-Omani,	504	643	0	502	475	404	636	569	565	366	690	719	0	384	584	592	490
2008	56	Non-Omani,	504	643	439	392	166	518	584	463	511	250	794	719	330	384	584	645	205
2008	57	Non-Omani,	504	643	491	502	320	461	688	410	511	366	741	0	330	384	584	0	429
2008	58	Non-Omani,	504	643	491	502	166	575	584	463	511	480	690	719	0	384	584	757	315
2008	59	Non-Omani,	504	643	439	502	166	575	688	463	460	480	690	719	0	384	584	757	490
2008	60	Non-Omani,	504	643	439	559	320	461	688	311	511	424	741	772	446	435	584	704	205
2008	61	Non-Omani,	504	0	439	559	320	461	688	569	511	308	537	719	446	642	584	645	315
2008	62	Non-Omani,	504	643	439	502	550	404	740	463	565	424	690	719	446	384	584	0	490
2008	63	Non-Omani,	504	643	491	445	475	461	584	463	511	424	640	719	330	384	0	0	600
2008	64	Non-Omani,	504	643	439	502	320	404	688	258	565	480	690	719	446	384	584	704	429
2008	65	Omani,	504	643	439	445	320	461	636	311	511	424	741	719	504	537	507	645	258
2008	66	Omani,	452	643	439	392	320	461	636	463	677	366	690	719	388	485	584	0	258
2008	67	Omani,	504	643	491	502	166	575	688	463	511	308	690	719	446	384	584	757	315
2008	68	Omani,	504	643	439	559	320	461	688	410	511	366	690	772	388	537	584	757	315
2008	69	Omani,	504	643	439	502	320	461	688	410	511	424	794	772	446	435	584	704	205
2008	70	Omani,	504	591	439	502	320	461	688	410	511	308	794	772	446	642	584	757	315
2008	71	Omani,	504	591	0	502	320	461	0	410	511	308	794	0	0	642	0	757	315
2008	72	Omani,	504	643	439	502	320	575	688	675	511	480	690	719	446	384	584	810	147
2008	73	Omani,	504	643	439	445	320	461	688	410	511	0	640	772	330	333	584	757	315
2008	74	Omani,	504	643	491	502	245	404	688	463	565	308	690	719	504	384	584	0	258
2008	75	Omani,	504	643	491	502	320	461	688	258	565	366	690	719	330	384	584	757	147
2008	76	Omani,	504	643	491	559	320	461	636	463	408	480	640	666	330	435	584	645	258
2008	77	Omani,	504	643	439	392	550	461	688	410	460	366	794	719	388	282	584	592	205
2008	78	Omani,	504	591	439	559	320	461	688	410	511	308	794	666	330	642	584	0	315
2008	79	Omani,	504	643	439	502	320	404	636	463	408	366	690	666	388	537	584	645	258
2008	80	Omani,	504	540	491	559	320	461	688	675	0	134	741	719	388	537	507	0	90
2008	81	Omani,	504	643	439	445	320	461	688	258	565	424	0	772	446	537	584	757	315
2008	82	Omani,	504	643	439	559	320	461	688	410	511	424	0	772	446	384	584	757	258
2008	83	Omani,	504	643	439	559	320	461	688	410	511	424	690	772	388	485	584	0	90
2008	84	Omani,	504	643	491	392	320	575	688	675	565	480	690	719	446	384	584	810	205
2008	85	Omani,	504	643	439	445	320	461	636	410	460	250	741	719	504	537	584	645	258
2008	86	Omani,	504	643	439	392	320	461	636	463	408	480	640	719	446	180	584	645	205
2008	87	Omani,	504	643	439	559	320	461	688	410	511	250	590	0	504	693	584	757	315
2008	88	Omani,	504	643	491	392	320	404	740	258	565	308	690	719	388	384	584	704	147
2008	89	Omani,	504	643	439	445	320	461	688	410	511	424	741	772	446	537	584	0	315
2008	90	Omani,	504	591	491	502	320	632	688	463	511	308	690	719	446	384	507	757	429
2008	91	Omani,	400	540	439	502	166	461	584	410	300	308	690	719	330	384	0	0	147
2008	92	Non-Omani,	504	643	439	559	320	461	688	410	511	424	794	772	446	591	584	757	315
2008	93	Omani,	504	643	439	559	320	461	688	410	565	366	847	772	388	333	584	645	258
2008	94	Omani,	504	643	439	559	550	461	688	410	511	424	794	772	446	642	584	757	315
2008	95	Omani,	504	643	439	559	320	461	740	205	511	424	741	772	446	537	584	757	600
2008	96	Omani,	504	643	439	559	320	461	584	410	511	480	640	719	446	642	584	757	315
2008	97	Omani,	504	643	439	559	245	461	636	360	511	366	640	772	446	485	584	704	258
2008	98	Omani,	504	643	491	502	475	575	584	463	511	308	640	719	388	384	584	810	205
2008	99	Omani,	504	643	491	502	550	575	688	675	511	480	690	719	446	384	584	810	205
2008	100	Omani,	504	643	439	559	320	461	636	410	511	480	640	772	446	485	584	704	372
2008	101	Omani,	504	643	439	392	166	461	740	410	511	424	741	772	562	537	584	757	315
2008	102	Omani,	504	643	439	392	320	575	636	410	408	480	741	0	388	642	584	0	372
2008	103	Omani,	504	643	439	502	320	461	636	410	408	538	640	666	446	485	584	0	258
2008	104	Omani,	504	643	491	392	550	404	688	410	565	308	690	719	214	384	584	704	429
2008	105	Omani,	0	643	439	502	0	461	636	463	511	308	537	0	446	384	430	757	205
2008	106	Omani,	504	540	491	502	320	575	688	463	511	424	690	719	562	384	584	592	429
2008	107	Omani,	504	643	439	502	320	461	636	410	511	424	640	719	446	537	584	645	258
2008	108	Omani,	504	643	439	559	320	461	688	410	511	308	0	825	330	485	584	757	90
2008	109	Omani,	504	643	439	559	320	461	740	410	511	308	741	772	330	642	584	757	315
2008	110	Omani,	504	643	491	502	320	575	688	463	460	308	690	719	388	384	584	757	147
2008	111	Omani,	504	643	491	502	166	404	688	410	511	308	690	719	446	384	584	645	429
2008	112	Omani,	504	643	439	559	320	461	688	410	511	366	847	772	0	642	584	757	315
2008	113	Non-Omani,	504	540	491	502	320	404	688	463	565	424	690	666	0	384	584	0	429
2008	114	Non-Omani,	400	540	439	445	320	461	636	410	623	424	690	0	446	384	584	0	315
2008	115	Omani,	504	643	491	502	398	404	740	463	565	480	690	719	330	384	584	704	205
2008	116	Omani,	504	643	439	559	550	461	636	463	408	480	640	719	446	591	584	645	205
2008	117	Omani,	504	643	491	502	166	404	636	463	565	424	690	719	388	384	584	810	429
2008	118	Omani,	504	643	439	445	166	461	636	410	623	424	640	666	330	333	584	645	205
2008	119	Non-Omani,	0	540	439	502	320	461	0	410	353	424	640	772	446	642	584	645	315
2008	120	Non-Omani,	504	643	491	502	320	575	584	463	511	308	794	0	446	384	584	757	490
2008	121	Omani,	504	643	491	346	320	743	636	463	460	366	690	719	504	384	584	704	205
2008	122	Omani,	504	591	439	559	320	404	636	360	408	308	690	666	446	537	584	645	205
2008	123	Omani,	504	643	491	502	245	686	688	463	460	366	690	719	388	384	584	704	600
2008	124	Omani,	504	643	439	559	320	461	688	205	511	424	794	719	446	485	584	757	315
2008	125	Omani,	504	643	439	559	320	461	688	205	511	424	794	719	388	485	584	757	315
2008	126	Omani,	504	643	439	445	320	461	688	410	511	424	794	719	562	435	430	757	315
2008	127	Omani,	504	540	491	502	550	575	688	152	511	308	690	719	330	384	584	592	429
2008	128	Non-Omani,	504	643	491	502	550	404	688	463	511	366	690	719	446	384	584	704	315
2008	129	Non-Omani,	504	540	491	346	475	575	688	463	460	480	690	719	0	384	584	757	429
2008	130	Omani,	504	643	439	445	320	461	688	410	511	424	794	0	446	642	430	757	258
2008	131	Omani,	504	0	0	559	320	461	0	410	511	424	794	0	504	537	0	757	258
2008	132	Omani,	504	643	491	502	245	575	740	675	511	480	690	719	0	384	584	810	315
2009	133	Non-Omani,	504	694	439	502	550	518	0	410	511	366	690	0	214	537	584	757	205
2009	134	Omani,	504	643	439	559	166	461	688	410	353	308	741	772	504	384	584	645	205
2009	135	Omani,	504	643	439	502	398	461	636	410	408	424	640	719	330	537	584	645	147
2009	136	Omani,	504	643	439	559	320	461	584	410	623	366	590	719	388	537	584	592	205
2009	137	Omani,	504	643	439	559	320	461	636	258	565	366	847	772	504	333	584	704	258
2009	138	Omani,	504	643	491	502	550	575	584	258	511	308	690	719	388	384	584	757	372
2009	139	Omani,	504	643	439	559	320	404	636	463	408	308	590	719	388	537	584	645	0
2009	140	Omani,	504	591	330	559	320	404	636	463	408	308	690	0	446	537	584	645	258
2009	141	Omani,	452	643	0	559	320	461	636	463	408	308	690	612	446	537	584	645	258
2009	142	Non-Omani,	504	643	384	502	550	518	636	311	511	366	794	0	446	384	584	757	205
2009	143	Non-Omani,	560	643	491	502	398	404	688	463	511	366	690	772	0	384	584	757	90
2009	144	Non-Omani,	504	643	439	559	320	461	636	410	511	424	690	719	388	642	0	757	90
2009	145	Non-Omani,	504	643	439	559	320	461	688	410	511	366	690	719	0	435	584	704	315
2009	146	Non-Omani,	504	643	439	445	320	461	636	410	511	366	794	612	388	231	584	757	315
2009	147	Non-Omani,	504	643	491	502	550	344	688	205	511	366	690	719	446	642	584	757	258
2009	148	Non-Omani,	504	643	439	559	166	461	636	410	511	480	794	719	504	537	584	645	258
2009	149	Non-Omani,	504	643	384	559	320	230	740	410	511	480	741	719	446	333	584	645	205
2009	150	Omani,	504	643	439	559	320	461	636	258	565	366	794	612	0	384	584	757	315
2009	151	Omani,	504	643	439	502	320	461	688	258	511	480	794	772	330	642	584	757	258
2009	152	Omani,	504	643	439	559	320	461	688	410	565	366	640	825	0	537	507	645	205
2009	153	Omani,	291	643	439	559	398	461	584	463	565	366	640	719	446	537	584	0	90
2009	154	Omani,	504	643	330	559	320	461	636	258	511	480	690	612	562	485	584	757	147
2009	155	Omani,	504	643	491	502	550	575	584	463	511	366	794	0	446	384	584	704	90
2009	156	Non-Omani,	504	643	439	559	320	461	688	410	511	480	590	772	446	642	584	757	205
2009	157	Omani,	504	643	491	559	550	287	584	463	0	366	590	0	446	384	584	0	205
2009	158	Omani,	504	643	439	445	166	575	688	410	511	366	794	719	446	642	584	704	147
2009	159	Omani,	452	643	544	502	166	404	636	463	623	308	690	719	446	537	584	757	429
2009	160	Omani,	452	643	439	559	320	461	636	463	677	308	690	719	330	485	584	592	258
2009	161	Non-Omani,	504	643	330	559	166	461	0	410	511	480	794	719	446	384	584	645	258
2009	162	Non-Omani,	504	643	439	559	320	404	688	258	565	366	640	719	446	485	507	704	258
2009	163	Non-Omani,	504	643	439	559	320	461	688	410	511	366	741	719	0	740	584	757	147
2009	164	Non-Omani,	504	643	439	559	320	461	688	410	511	480	794	719	446	642	584	704	315
2009	165	Omani,	504	643	439	559	320	518	584	410	460	366	794	719	562	282	584	757	315
2009	166	Omani,	504	643	439	559	320	461	636	410	460	366	794	719	388	537	584	645	315
2009	167	Omani,	504	643	439	559	320	461	688	258	511	366	741	719	446	435	584	757	315
2009	168	Omani,	504	643	439	445	320	461	584	205	460	366	741	772	446	642	584	645	315
2009	169	Omani,	504	643	491	502	550	632	636	311	511	366	794	719	446	384	584	757	0
2009	170	Omani,	504	694	544	502	550	177	688	463	511	366	690	772	446	537	584	757	90
2009	171	Omani,	504	643	439	502	320	461	688	410	511	366	690	719	504	591	584	645	90
2009	172	Omani,	504	643	491	502	550	686	688	410	511	366	690	719	0	384	584	757	372
2009	173	Omani,	504	643	491	502	550	575	636	311	460	366	690	719	330	384	584	704	205
2009	174	Omani,	452	643	439	445	320	461	636	311	460	366	690	719	388	435	584	645	258
2009	175	Omani,	504	489	384	502	550	461	636	516	511	366	690	772	388	485	584	757	90
2009	176	Omani,	504	591	491	502	550	575	688	152	353	308	690	719	330	384	584	810	429
2009	177	Omani,	504	489	491	502	550	575	636	516	511	366	590	772	562	384	584	757	540
2009	178	Omani,	504	643	491	502	550	404	636	675	353	308	690	719	330	384	584	757	258
2009	179	Non-Omani,	504	643	439	559	320	287	688	410	511	366	741	772	504	485	584	757	90
2009	180	Omani,	504	643	439	559	320	461	636	410	565	366	640	719	0	537	0	645	205
2009	181	Non-Omani,	504	643	491	502	550	0	636	463	460	366	690	719	446	384	584	757	315
2009	182	Non-Omani,	504	643	439	502	550	344	636	463	511	538	690	719	388	384	0	810	258
2009	183	Non-Omani,	504	643	439	559	320	404	688	360	511	366	690	772	446	537	584	645	90
2009	184	Non-Omani,	504	643	439	559	320	230	636	311	460	366	794	612	446	537	584	704	258
2009	185	Non-Omani,	504	643	439	559	320	461	688	463	408	366	640	772	446	333	584	645	258
2009	186	Non-Omani,	504	643	439	559	320	461	688	463	623	366	690	719	330	384	584	592	258
2009	187	Non-Omani,	504	643	439	559	320	230	584	410	511	480	690	719	446	642	584	757	205
2009	188	Non-Omani,	504	489	544	502	475	575	584	311	511	366	690	719	388	384	584	757	490
2009	189	Non-Omani,	504	591	491	502	398	575	688	463	460	308	690	719	446	384	584	704	147
2009	190	Non-Omani,	560	643	491	502	550	461	636	463	511	366	690	719	446	384	584	757	258
2009	191	Non-Omani,	504	643	439	445	166	287	688	410	511	366	794	719	446	591	584	645	90
2009	192	Non-Omani,	504	643	439	559	320	461	688	410	511	480	741	719	0	384	0	645	147
2009	193	Non-Omani,	504	643	439	559	320	461	688	463	511	366	794	825	0	693	584	757	90
2009	194	Non-Omani,	452	643	491	559	550	575	636	463	245	308	690	719	446	384	584	757	147
2009	195	Non-Omani,	504	643	439	445	320	461	636	258	511	366	741	719	388	642	584	757	147
2009	196	Non-Omani,	504	643	439	559	320	461	584	410	460	366	741	666	446	384	584	757	315
2009	197	Non-Omani,	504	694	439	559	320	404	584	360	511	366	690	719	446	384	0	645	205
2009	198	Non-Omani,	504	643	439	559	320	461	584	410	511	366	794	719	446	642	584	757	0
2009	199	Non-Omani,	504	643	439	559	320	461	688	410	460	480	794	772	446	642	584	704	147
2009	200	Non-Omani,	504	643	439	559	166	461	0	410	511	480	741	719	0	384	584	704	315
2009	201	Non-Omani,	504	643	439	445	320	461	584	410	511	366	794	719	388	384	584	757	205
2009	202	Non-Omani,	504	643	544	502	550	461	636	463	511	366	690	719	388	384	584	645	315
2009	203	Non-Omani,	504	643	491	502	704	177	636	463	511	308	690	0	446	384	584	810	90
2009	204	Non-Omani,	504	643	491	502	630	404	636	463	565	366	690	772	504	384	584	704	315
2009	205	Non-Omani,	504	643	491	502	550	575	636	675	511	308	690	0	330	384	584	810	372
2009	206	Non-Omani,	504	643	491	502	550	404	636	463	565	308	690	719	330	384	584	757	429
2009	207	Non-Omani,	504	643	491	502	550	575	584	258	511	366	690	719	562	485	584	757	315
2009	208	Non-Omani,	452	643	491	502	398	404	688	463	565	308	690	772	330	384	584	645	429
2009	209	Non-Omani,	452	643	439	559	320	404	636	463	677	308	640	666	388	537	584	592	147
2009	210	Non-Omani,	504	643	439	559	320	461	688	410	408	366	640	772	0	537	584	645	205
2009	211	Non-Omani,	452	643	330	559	320	461	636	463	565	308	690	719	330	537	584	592	258
2009	212	Omani,	504	643	491	445	320	632	688	360	460	366	590	719	446	537	584	645	147
2009	213	Omani,	504	643	491	502	166	461	636	463	511	366	640	719	330	537	584	810	258
2009	214	Omani,	504	643	439	559	166	461	688	410	511	366	847	719	388	231	584	757	315
2009	215	Omani,	504	643	439	559	320	461	688	410	511	480	640	719	446	384	584	757	315
2009	216	Omani,	504	643	439	559	550	461	688	258	511	366	794	772	446	384	584	757	315
2009	217	Omani,	504	643	439	502	320	461	688	258	511	366	794	772	330	642	584	757	315
2009	218	Omani,	504	643	491	502	550	575	636	360	511	308	690	719	388	435	0	810	315
2009	219	Omani,	504	643	491	502	398	404	636	152	565	308	690	666	0	384	0	757	429
2009	220	Omani,	504	643	439	559	320	404	636	410	511	366	590	719	446	591	584	645	372
2009	221	Omani,	452	643	439	559	320	461	688	463	565	596	690	772	388	591	584	592	205
2009	222	Omani,	504	643	439	502	245	461	636	410	460	480	741	719	504	333	584	645	205
2009	223	Omani,	452	591	439	559	320	177	688	463	623	308	690	772	446	537	584	592	205
2009	224	Omani,	452	643	439	559	320	461	584	463	408	308	690	719	330	384	584	592	258
2009	225	Omani,	504	643	439	559	166	461	688	311	460	366	640	772	388	384	584	645	258
2009	226	Omani,	504	591	439	559	550	461	636	205	460	366	590	719	446	537	584	645	147
2009	227	Omani,	504	643	439	615	320	344	688	410	460	366	690	772	446	642	584	645	205
2009	228	Omani,	504	643	439	559	320	461	636	410	511	366	741	719	446	384	584	757	90
2009	229	Omani,	504	643	439	445	320	287	636	311	460	480	741	719	446	537	584	645	147
2009	230	Omani,	504	643	491	559	166	575	584	205	408	366	690	719	562	384	584	757	90
2009	231	Omani,	504	643	439	559	320	461	636	410	511	366	741	666	446	282	584	757	315
2009	232	Omani,	504	643	491	502	320	632	636	463	460	366	690	612	446	333	584	757	147
2009	233	Omani,	504	694	439	559	320	461	688	360	511	366	690	772	388	537	584	757	315
2009	234	Omani,	504	591	439	559	320	461	688	410	511	480	794	772	446	642	584	757	315
2009	235	Omani,	504	643	439	559	320	461	688	410	511	366	794	719	446	591	584	757	315
2009	236	Omani,	185	643	330	559	320	461	636	410	511	366	847	719	446	485	584	704	372
2009	237	Omani,	504	643	439	559	320	461	688	410	511	480	794	719	446	642	0	757	315
2009	238	Omani,	504	643	491	502	398	120	688	463	460	366	741	772	388	384	584	704	540
2009	239	Omani,	504	591	439	502	166	404	636	410	511	308	690	666	446	384	584	757	205
2009	240	Omani,	452	643	491	502	320	575	688	311	511	308	690	0	446	384	584	645	429
2009	241	Omani,	504	643	491	502	550	575	636	258	511	308	690	719	0	384	584	810	429
2009	242	Omani,	504	643	439	445	320	461	636	205	511	480	741	719	330	537	584	645	258
2009	243	Omani,	504	591	439	559	320	404	688	463	408	308	690	719	446	180	584	645	258
2009	244	Omani,	504	643	439	502	398	518	636	410	460	366	537	719	446	537	584	645	258
2009	245	Omani,	504	643	439	559	320	230	636	410	460	366	690	666	0	537	584	439	205
2009	246	Non-Omani,	504	643	439	502	550	575	584	311	511	366	690	719	504	384	584	757	205
2009	247	Non-Omani,	504	643	330	502	320	404	688	410	565	366	590	719	388	485	584	645	315
2009	248	Non-Omani,	504	643	439	502	320	404	688	410	565	366	590	719	446	693	584	645	315
2009	249	Non-Omani,	504	643	439	559	398	461	636	463	408	366	640	0	446	485	584	645	147
2009	250	Non-Omani,	560	643	491	502	550	575	688	311	511	366	690	0	330	231	584	757	258
2009	251	Non-Omani,	504	643	491	502	550	404	688	311	565	308	690	719	446	384	584	757	258
2009	252	Non-Omani,	504	643	384	502	398	404	636	463	565	308	690	612	446	384	584	704	429
2009	253	Non-Omani,	504	643	439	445	320	461	688	311	565	480	741	719	446	537	507	645	205
2009	254	Omani,	504	643	491	502	550	404	584	569	511	366	690	666	330	384	584	757	429
2009	255	Omani,	504	643	439	559	320	461	584	410	511	366	794	719	446	231	584	757	315
2009	256	Omani,	504	591	330	559	320	120	688	463	408	308	690	0	446	537	0	645	147
2009	257	Omani,	504	591	330	502	320	461	636	258	408	308	690	719	446	537	584	592	147
2009	258	Omani,	504	643	439	559	320	461	636	410	408	366	690	719	678	384	584	592	147
2009	259	Omani,	504	540	384	502	475	575	636	463	511	366	690	719	446	384	584	592	429
2009	260	Omani,	504	643	491	502	475	575	0	463	511	366	690	0	0	384	584	810	372
2009	261	Omani,	504	643	491	502	550	404	688	463	565	308	690	719	446	384	584	704	429
2009	262	Omani,	504	643	439	559	320	461	688	410	511	366	741	772	0	384	584	757	315
2009	263	Omani,	504	643	439	559	320	461	636	410	511	366	741	719	0	642	584	757	315
2009	264	Omani,	504	643	491	502	166	575	584	516	511	308	690	666	504	384	584	810	258
2009	265	Omani,	504	643	491	502	320	404	688	205	460	366	690	772	446	591	584	704	315
2009	266	Omani,	504	643	439	559	320	230	688	463	460	366	741	772	504	591	584	645	205
2009	267	Omani,	452	643	439	559	320	461	688	463	511	308	690	719	388	537	584	592	258
2009	268	Omani,	452	540	439	445	320	230	688	463	565	366	690	719	446	537	584	592	258
2009	269	Omani,	504	643	439	559	245	461	688	205	511	366	640	719	388	485	584	704	258
2009	270	Omani,	504	643	491	502	550	404	688	410	565	308	741	719	446	384	584	704	258
2009	271	Omani,	504	643	491	392	475	575	636	463	300	366	690	719	446	231	584	645	205
2009	272	Omani,	504	643	491	502	550	518	584	152	511	308	690	719	446	384	584	810	258
2009	273	Omani,	452	591	439	445	320	404	636	675	408	308	690	612	446	537	584	645	258
2009	274	Omani,	504	643	491	502	550	575	0	258	511	366	690	612	388	384	584	757	205
2009	275	Omani,	504	643	439	559	320	461	688	205	511	480	741	772	446	642	584	704	315
2009	276	Omani,	504	643	491	502	550	575	584	463	511	308	690	719	330	384	584	810	258
2009	277	Non-Omani,	504	643	439	559	320	287	636	410	460	366	794	719	446	435	584	757	315
2009	278	Non-Omani,	504	643	544	502	475	404	636	410	511	424	690	0	0	384	584	704	372
2009	279	Non-Omani,	504	643	491	502	550	518	636	463	511	366	690	612	504	384	584	757	205
2009	280	Omani,	504	643	439	559	166	461	636	410	408	366	690	719	388	642	584	757	258
2009	281	Omani,	504	643	491	502	550	575	740	311	623	308	690	719	446	384	584	757	205
2009	282	Omani,	504	643	491	502	550	575	688	205	511	308	690	719	0	384	584	757	90
2010	283	Omani,	504	643	0	559	320	461	636	410	353	366	847	0	388	333	0	645	258
2010	284	Omani,	504	591	439	559	550	0	636	410	460	366	640	719	330	537	584	645	147
2010	285	Omani,	504	643	491	502	550	0	0	0	511	308	690	719	446	384	0	810	205
2010	286	Omani,	504	643	491	502	475	461	688	463	511	366	741	719	562	384	584	592	205
2010	287	Omani,	504	694	439	559	320	575	740	410	511	480	900	825	446	0	584	810	0
2010	288	Non-Omani,	504	643	439	502	320	0	688	410	511	480	640	719	446	642	584	757	372
2010	289	Omani,	504	643	439	559	320	461	636	410	565	366	640	719	330	537	507	645	205
2010	290	Omani,	504	643	439	502	320	461	636	360	460	366	690	612	0	435	584	645	205
2010	291	Non-Omani,	504	643	439	559	398	461	636	410	565	366	741	719	446	485	584	645	147
2010	292	Non-Omani,	504	643	439	559	320	0	636	410	565	366	690	772	446	384	584	645	205
2010	293	Non-Omani,	504	643	491	502	550	404	0	463	460	366	537	719	388	384	584	704	653
2010	294	Non-Omani,	504	643	439	559	320	575	688	410	460	480	741	719	446	435	584	757	372
2010	295	Non-Omani,	504	643	0	0	320	461	0	410	460	308	741	0	446	435	0	757	205
2010	296	Non-Omani,	504	694	439	559	320	461	636	463	511	366	741	666	330	537	0	645	258
2010	297	Omani,	504	591	439	559	320	743	636	463	408	308	640	510	446	537	584	645	205
2010	298	Omani,	504	643	0	346	550	404	636	410	460	366	537	0	0	435	584	645	205
2010	299	Non-Omani,	504	643	491	502	781	575	688	463	460	366	690	719	388	384	584	704	653
2010	300	Non-Omani,	504	0	491	230	550	461	688	463	460	366	741	719	388	384	584	704	205
2010	301	Non-Omani,	504	643	439	559	320	461	688	410	408	366	690	772	446	642	584	645	205
2010	302	Non-Omani,	504	643	439	559	320	575	636	410	511	366	741	772	446	435	584	757	315
2010	303	Non-Omani,	504	643	439	559	320	461	688	410	511	366	741	772	446	0	584	757	315
2010	304	Non-Omani,	504	643	491	559	550	461	688	360	565	308	794	719	446	384	584	704	0
2010	305	Non-Omani,	504	643	439	559	320	632	636	410	565	366	640	612	446	537	584	645	0
2010	306	Omani,	504	643	439	559	320	461	636	410	460	480	640	612	446	435	584	645	258
2010	307	Omani,	504	643	439	559	320	461	688	410	511	366	741	772	446	435	584	757	315
2010	308	Omani,	504	540	491	502	475	575	688	516	511	308	640	0	0	384	507	704	429
2010	309	Omani,	504	643	439	559	398	461	636	410	511	480	690	719	446	537	584	704	147
2010	310	Omani,	504	643	491	0	320	461	636	0	511	366	690	0	0	435	584	757	205
2010	311	Omani,	504	643	439	502	550	461	584	463	511	366	690	0	388	384	584	757	600
2010	312	Non-Omani,	504	540	491	502	550	518	688	463	511	308	690	719	446	384	584	810	205
2010	313	Omani,	504	540	491	502	475	461	688	258	511	366	741	0	330	333	584	592	429
2010	314	Omani,	504	643	439	559	320	461	688	410	565	366	794	772	446	693	584	757	315
2010	315	Omani,	504	643	439	559	245	461	636	360	511	366	640	772	388	282	584	704	258
2010	316	Omani,	504	643	491	502	475	0	584	463	511	366	741	666	388	333	584	810	0
2010	317	Omani,	504	643	439	559	320	461	688	410	460	366	741	772	446	642	584	757	372
2010	318	Omani,	504	643	439	559	320	575	636	410	408	366	537	719	446	537	430	645	258
2010	319	Non-Omani,	504	643	439	559	320	0	688	410	460	480	640	719	446	435	584	757	205
2010	320	Omani,	504	643	439	559	320	575	636	463	408	366	640	719	446	435	584	645	205
2011	321	Non-Omani,	504	643	439	0	320	0	636	360	245	0	741	719	0	537	584	645	540
2011	322	Non-Omani,	504	643	544	0	475	0	688	463	353	0	640	719	0	384	584	757	490
2011	323	Omani,	504	643	330	0	320	0	688	410	408	0	640	719	0	537	584	757	205
2011	324	Omani,	504	643	439	0	320	0	688	410	300	0	590	719	0	642	584	757	429
2011	325	Omani,	504	643	439	0	320	0	636	410	245	0	741	719	0	537	584	645	540
2011	326	Omani,	504	643	491	0	550	0	636	463	408	0	640	666	0	384	584	810	429
2011	327	Omani,	504	643	491	0	320	0	584	463	353	0	690	719	0	384	584	757	490
2011	328	Omani,	504	643	439	0	320	0	636	410	300	0	741	772	0	642	584	757	540
2011	329	Omani,	504	643	439	0	320	0	688	410	353	0	640	0	0	485	584	757	372
2011	330	Omani,	504	643	439	0	320	0	688	410	300	0	741	772	0	642	584	757	540
2011	331	Omani,	504	643	384	0	550	0	636	463	408	0	741	719	0	384	584	704	490
2011	332	Non-Omani,	504	643	439	0	320	0	688	410	300	0	741	719	0	485	584	757	372
2011	333	Omani,	504	591	439	0	550	0	636	152	138	0	741	719	0	537	584	645	540
2011	334	Non-Omani,	504	643	439	0	245	0	740	410	353	0	741	719	0	642	584	757	540
2011	335	Non-Omani,	504	643	330	0	320	0	636	463	245	0	640	719	0	537	584	645	490
2011	336	Non-Omani,	452	643	439	0	320	0	688	410	300	0	741	666	0	642	584	757	540
2011	337	Omani,	504	643	491	0	398	0	584	463	300	0	640	719	0	384	584	757	490
2011	338	Non-Omani,	504	643	491	0	550	0	584	463	565	0	741	719	0	384	584	704	490
2011	339	Non-Omani,	504	643	439	0	320	0	740	410	353	0	741	719	0	642	584	757	540
2011	340	Non-Omani,	504	643	439	0	320	0	688	410	353	0	794	719	0	642	584	757	540
2011	341	Non-Omani,	504	643	439	0	320	0	636	463	245	0	640	719	0	485	584	592	540
2011	342	Non-Omani,	504	643	439	0	320	0	636	410	300	0	741	772	0	642	584	592	540
2011	343	Non-Omani,	504	643	439	0	320	0	636	360	138	0	640	719	0	537	584	645	540
2011	344	Omani,	504	643	439	0	166	0	688	410	300	0	640	772	0	537	584	704	540
2011	345	Omani,	504	643	439	0	320	0	688	410	353	0	690	719	0	537	584	757	540
2011	346	Omani,	504	643	439	0	320	0	636	410	138	0	640	719	0	792	584	757	540
2011	347	Non-Omani,	504	643	439	0	320	0	688	410	300	0	741	719	0	591	584	757	540
2011	348	Non-Omani,	504	643	439	0	320	0	688	410	245	0	640	666	0	485	584	645	540
2011	349	Non-Omani,	504	643	330	0	320	0	740	152	245	0	741	772	0	591	584	757	490
2011	350	Non-Omani,	504	643	491	0	550	0	584	463	300	0	640	666	0	384	584	645	490
2011	351	Non-Omani,	452	643	439	0	320	0	636	463	245	0	741	719	0	537	584	592	540
2011	352	Non-Omani,	560	643	491	0	550	0	688	463	408	0	741	666	0	384	584	810	490
2011	353	Non-Omani,	504	540	491	0	475	0	688	463	408	0	640	719	0	384	584	592	490
2011	354	Non-Omani,	504	643	439	0	320	0	688	410	300	0	794	825	0	642	584	757	540
2011	355	Non-Omani,	504	643	439	0	398	0	0	410	138	0	690	719	0	537	0	645	540
2011	356	Non-Omani,	504	0	439	0	320	0	688	410	300	0	741	772	0	642	584	757	540
2011	357	Non-Omani,	504	643	439	0	320	0	636	410	245	0	640	0	0	537	584	704	429
2011	358	Non-Omani,	504	643	330	0	320	0	688	410	300	0	741	772	0	282	584	757	540
2011	359	Non-Omani,	504	643	330	0	320	0	688	410	245	0	741	772	0	642	584	757	540
2011	360	Non-Omani,	452	643	491	0	550	0	584	410	84	0	690	719	0	384	584	704	490
2011	361	Non-Omani,	504	643	491	0	550	0	688	463	408	0	741	0	0	384	584	810	490
2011	362	Non-Omani,	504	643	439	0	320	0	636	410	245	0	640	719	0	333	584	645	540
2011	363	Omani,	504	643	0	0	320	0	0	410	245	0	640	0	0	537	584	757	540
2011	364	Omani,	504	643	491	0	550	0	688	463	408	0	690	719	0	384	584	704	490
2011	365	Omani,	504	643	330	0	320	0	636	410	300	0	640	666	0	642	584	645	540
2011	366	Omani,	504	643	439	0	320	0	688	410	300	0	794	772	0	537	584	645	540
2011	367	Omani,	504	643	491	0	550	0	636	463	245	0	590	719	0	231	584	704	490
2011	368	Omani,	504	643	330	0	320	0	688	410	300	0	741	772	0	642	584	757	372
2011	369	Omani,	504	643	439	0	320	0	636	463	245	0	741	666	0	537	584	645	490
2011	370	Non-Omani,	504	643	439	0	320	0	688	410	300	0	847	772	0	642	584	757	0
2011	371	Omani,	504	643	491	0	550	0	688	463	408	0	794	719	0	384	584	757	490
2011	372	Omani,	504	643	491	0	550	0	688	516	300	0	741	719	0	435	584	757	490
2011	373	Omani,	504	643	491	0	398	0	688	463	408	0	690	719	0	384	584	757	490
2011	374	Omani,	504	643	491	0	550	0	688	516	245	0	640	719	0	384	584	810	490
2011	375	Omani,	504	643	330	0	320	0	636	311	245	0	794	719	0	537	584	645	540
2011	376	Non-Omani,	504	643	491	0	550	0	688	516	408	0	640	719	0	384	584	757	490
2011	377	Omani,	504	643	491	0	320	0	584	463	408	0	690	719	0	384	584	810	490
2012	378	Omani,	504	643	439	392	166	575	0	410	511	480	640	719	446	642	507	0	0
2012	379	Non-Omani,	504	643	439	559	475	575	636	569	511	366	690	772	446	384	584	810	429
2012	380	Non-Omani,	504	643	491	502	550	575	688	516	460	366	690	666	446	384	584	704	315
2012	381	Non-Omani,	504	0	0	392	166	404	0	516	511	366	0	0	388	384	0	0	429
2012	382	Omani,	504	643	439	445	320	461	688	410	511	366	953	772	446	537	584	645	315
2012	383	Omani,	504	643	491	502	320	461	688	410	511	366	690	772	446	642	430	592	372
2012	384	Omani,	504	643	439	502	550	404	688	516	565	308	690	772	446	384	584	592	429
2012	385	Non-Omani,	504	643	439	392	166	575	584	463	511	366	690	719	388	384	584	704	0
2012	386	Non-Omani,	504	643	491	502	550	686	636	463	460	366	590	719	388	384	584	704	600
2012	387	Non-Omani,	504	643	330	392	320	461	636	410	565	480	847	772	504	81	584	704	315
2012	388	Non-Omani,	504	0	0	502	320	461	0	410	511	480	0	0	446	642	0	0	315
2012	389	Non-Omani,	504	643	439	392	320	461	636	410	623	366	741	719	446	537	584	810	258
2012	390	Omani,	504	643	491	559	320	461	688	463	511	480	640	719	446	537	584	645	372
2012	391	Omani,	504	643	439	392	320	461	636	410	511	480	640	719	446	537	584	645	372
2012	392	Omani,	504	540	439	502	320	461	0	410	408	480	640	719	446	642	584	757	372
2012	393	Omani,	504	643	439	392	320	575	584	410	565	366	847	772	504	435	584	592	315
2012	394	Non-Omani,	504	643	439	559	320	461	636	410	565	480	741	719	446	537	584	757	258
2012	395	Non-Omani,	504	591	491	392	320	461	636	410	511	480	690	719	446	537	584	645	258
2012	396	Non-Omani,	504	643	439	392	320	518	636	410	460	480	847	666	446	333	584	592	258
2012	397	Non-Omani,	504	0	0	502	550	404	0	0	565	308	0	0	446	384	0	0	490
2012	398	Non-Omani,	504	0	0	502	550	404	0	463	565	308	0	0	446	384	0	0	429
2012	399	Non-Omani,	504	643	439	392	320	461	740	410	511	480	741	719	446	642	584	645	372
2012	400	Non-Omani,	504	643	439	502	320	461	688	410	460	366	640	772	446	642	584	645	315
2012	401	Non-Omani,	504	694	491	445	320	461	688	410	511	366	900	719	446	485	584	810	372
2012	402	Non-Omani,	504	643	491	0	320	461	636	410	511	366	640	772	446	642	584	704	258
2012	403	Non-Omani,	504	643	439	559	166	461	636	410	460	366	690	719	446	537	584	704	315
2012	404	Non-Omani,	504	643	491	392	166	575	636	463	511	366	690	772	504	384	584	704	0
2012	405	Non-Omani,	504	643	0	0	166	575	636	463	511	366	741	719	504	384	584	757	429
2012	406	Non-Omani,	504	643	330	502	550	404	688	410	511	308	794	719	562	384	507	757	429
2012	407	Omani,	504	643	439	392	320	461	0	410	565	366	900	0	388	333	584	645	315
2012	408	Omani,	504	643	439	392	166	461	0	360	0	424	640	719	388	485	584	704	0
2012	409	Omani,	504	643	439	445	245	404	636	463	565	308	690	719	446	384	584	757	429
2012	410	Omani,	504	643	439	502	550	575	688	725	511	308	847	719	446	384	584	645	824
2012	411	Omani,	504	0	0	445	320	461	0	410	511	480	0	0	446	591	0	0	372
2012	412	Omani,	504	643	491	559	320	461	0	410	511	366	690	772	446	537	584	645	315
2012	413	Omani,	504	643	491	559	320	461	688	410	565	366	847	772	388	333	584	757	315
2012	414	Omani,	504	643	330	502	320	461	0	410	511	366	847	772	446	537	584	645	315
2012	415	Omani,	504	643	330	392	320	575	636	463	511	308	741	719	446	384	584	757	429
2012	416	Omani,	504	0	0	392	245	404	0	463	565	308	690	0	446	384	0	645	429
2012	417	Omani,	504	643	439	559	320	461	636	410	408	192	847	719	388	537	584	0	258
2012	418	Omani,	452	643	491	559	320	461	636	463	727	308	690	719	388	537	584	704	258
2012	419	Omani,	504	643	491	502	320	461	584	410	460	366	847	719	504	537	584	757	205
2012	420	Omani,	504	643	439	392	320	461	688	410	460	366	640	0	388	81	584	645	315
2012	421	Omani,	504	643	439	445	475	575	584	463	511	366	690	719	388	384	584	757	258
2012	422	Omani,	504	643	439	502	320	632	636	360	460	366	590	719	388	537	584	645	147
2012	423	Omani,	504	643	491	502	320	575	584	463	511	366	590	719	388	384	584	592	653
2012	424	Omani,	504	643	439	346	475	404	636	311	565	308	690	719	446	384	584	645	490
2012	425	Omani,	504	0	0	559	320	461	0	410	565	480	0	0	446	435	0	0	315
2012	426	Omani,	504	0	0	615	550	404	0	463	565	308	0	0	446	384	0	0	429
2012	427	Omani,	504	643	491	502	550	575	688	725	565	308	847	719	446	384	584	810	653
2012	428	Omani,	504	643	439	445	550	686	688	463	460	366	690	719	330	384	584	704	653
2012	429	Omani,	504	643	491	392	166	575	636	463	511	366	690	719	388	384	584	704	600
2012	430	Omani,	504	643	384	615	320	404	636	258	623	366	640	772	388	485	584	645	258
2012	431	Non-Omani,	452	643	330	502	320	461	636	463	565	308	847	719	388	384	584	757	205
2012	432	Omani,	504	643	491	392	320	461	636	410	565	366	847	772	388	333	584	704	315
2012	433	Omani,	504	643	330	502	320	461	688	410	511	480	741	825	446	693	584	535	147
2012	434	Omani,	504	643	491	392	245	575	584	463	511	366	741	719	388	384	584	757	0
2012	435	Omani,	504	540	439	445	475	575	0	463	460	366	690	719	446	384	584	916	315
2012	436	Omani,	504	643	491	502	320	461	688	410	511	366	847	772	446	642	584	810	315
2012	437	Omani,	504	643	491	502	550	575	688	725	511	308	690	719	446	384	584	757	824
2012	438	Non-Omani,	504	643	439	0	320	461	636	410	460	366	640	666	446	333	584	810	429
2012	439	Non-Omani,	504	643	439	502	550	575	636	463	511	366	690	719	446	384	584	810	767
2012	440	Omani,	504	643	491	392	166	461	688	410	511	480	590	719	446	642	584	810	372
2012	441	Omani,	504	643	439	445	550	404	688	463	511	308	690	719	446	384	584	645	429
2012	442	Non-Omani,	452	643	330	502	320	461	688	463	623	308	690	719	388	537	584	592	258
2012	443	Omani,	504	0	330	392	166	404	636	0	565	308	0	719	446	384	584	0	429
2012	444	Omani,	452	643	491	559	320	120	636	0	565	308	690	719	388	537	584	757	205
2012	445	Omani,	504	643	439	559	320	461	636	410	511	366	690	772	446	642	584	704	315
2012	446	Omani,	504	643	439	502	320	461	688	410	565	366	900	772	388	333	584	810	258
2012	447	Omani,	504	643	491	392	320	461	0	410	408	480	640	719	388	537	584	704	258
2012	448	Omani,	504	643	491	445	550	404	688	463	565	308	690	719	446	384	584	757	429
2012	449	Omani,	504	643	491	502	320	461	688	410	511	366	847	772	446	333	430	810	315
2012	450	Omani,	504	643	491	502	550	404	688	463	565	308	690	719	388	231	584	704	372
2012	451	Omani,	504	643	0	392	320	461	0	463	623	366	741	560	562	591	0	704	205
2012	452	Omani,	504	643	491	559	245	461	0	360	511	366	640	772	388	485	584	810	258
2012	453	Non-Omani,	504	643	0	559	320	404	0	410	511	366	794	0	446	231	0	757	258
2012	454	Non-Omani,	504	643	330	502	550	575	636	463	511	308	690	719	446	384	584	704	429
2012	455	Omani,	504	643	439	559	320	461	636	410	623	366	690	612	446	537	584	592	315
2012	456	Omani,	504	643	544	392	166	0	636	0	511	308	690	719	446	384	584	645	429
2012	457	Omani,	504	643	491	392	166	0	636	0	511	308	690	719	446	384	584	645	429
2013	458	Non-Omani,	504	643	439	502	320	461	636	463	511	480	794	666	446	537	584	810	258
2013	459	Omani,	504	540	491	502	475	575	688	463	511	192	690	719	562	384	584	592	429
2013	460	Omani,	504	643	330	559	320	461	636	410	460	192	690	719	446	537	584	704	258
2013	461	Omani,	504	643	439	392	320	461	636	463	460	366	640	719	388	537	584	704	258
2013	462	Non-Omani,	504	643	330	559	320	461	636	463	511	480	741	719	446	537	584	592	258
2013	463	Non-Omani,	504	643	491	502	550	575	636	463	194	308	690	719	446	384	584	704	258
2013	464	Omani,	504	643	491	502	550	575	584	410	511	366	794	719	504	384	584	704	258
2013	465	Non-Omani,	504	643	330	392	320	461	636	152	511	480	0	666	446	537	584	704	258
2013	466	Non-Omani,	504	643	491	502	550	575	688	410	460	366	690	666	504	384	0	757	315
2013	467	Non-Omani,	504	643	330	559	320	461	636	410	511	134	741	772	446	642	584	810	372
2013	468	Non-Omani,	504	643	439	445	320	461	530	410	511	366	537	772	446	537	584	704	315
2013	469	Non-Omani,	504	643	439	445	320	461	688	463	511	366	794	772	446	537	584	757	429
2013	470	Non-Omani,	504	643	330	559	320	461	688	463	511	366	741	772	446	642	584	757	315
2013	471	Non-Omani,	504	540	491	445	475	575	688	410	460	366	690	719	446	384	584	757	372
2013	472	Omani,	504	643	330	445	320	461	636	569	511	480	794	772	446	384	584	704	315
2013	473	Omani,	504	643	439	559	320	461	688	410	511	480	640	719	446	537	584	704	372
2013	474	Omani,	504	643	439	559	320	461	688	463	460	366	640	719	388	591	0	757	258
2013	475	Omani,	504	643	491	559	320	461	584	463	460	366	794	719	388	537	584	704	429
2013	476	Omani,	504	643	491	559	550	575	688	410	511	308	690	0	446	384	584	592	205
2013	477	Omani,	452	643	330	392	320	461	636	463	565	308	690	719	388	537	584	810	258
2013	478	Omani,	504	643	439	559	320	461	688	410	0	366	794	772	446	537	584	757	147
2013	479	Omani,	504	591	330	502	320	461	636	410	565	366	537	666	446	537	584	645	205
2013	480	Non-Omani,	504	643	439	502	320	461	636	516	623	366	690	719	446	537	584	645	147
2013	481	Omani,	504	643	0	502	320	461	0	463	511	366	794	0	0	384	0	645	315
2013	482	Non-Omani,	504	643	439	502	320	461	636	463	408	366	590	772	388	435	584	645	258
2013	483	Non-Omani,	504	540	491	502	475	686	688	463	460	366	690	719	446	384	584	757	372
2013	484	Non-Omani,	504	643	330	392	320	461	688	152	511	308	690	719	446	537	584	592	258
2013	485	Non-Omani,	504	643	330	502	320	461	636	410	408	366	590	719	446	537	584	645	258
2013	486	Non-Omani,	400	643	491	502	550	575	636	463	460	308	690	666	446	384	584	757	429
2013	487	Non-Omani,	504	643	491	502	550	120	636	569	0	366	690	0	388	384	584	704	315
2013	488	Non-Omani,	238	643	439	445	320	461	636	410	460	250	537	666	446	333	430	810	315
2013	489	Non-Omani,	504	0	491	502	550	404	740	463	353	308	690	719	446	384	584	704	90
2013	490	Non-Omani,	504	540	491	502	475	575	688	463	511	366	640	772	562	384	584	592	429
2013	491	Non-Omani,	504	643	330	559	320	461	688	410	511	366	741	772	446	693	584	757	315
2013	492	Non-Omani,	504	643	384	502	320	120	688	152	511	366	690	772	446	384	584	810	429
2013	493	Non-Omani,	452	643	491	502	550	575	688	463	460	366	741	666	504	384	584	704	315
2013	494	Non-Omani,	504	643	330	392	320	461	584	463	460	134	640	0	446	537	0	704	372
2013	495	Non-Omani,	504	643	330	559	320	461	688	205	511	308	794	0	446	642	584	757	315
2013	496	Non-Omani,	504	643	439	502	320	461	688	152	460	366	900	772	446	591	584	704	315
2013	497	Non-Omani,	504	643	330	559	320	461	688	463	565	366	794	772	388	537	584	704	315
2013	498	Non-Omani,	504	643	439	445	166	575	688	569	511	366	640	719	446	537	584	757	90
2013	499	Non-Omani,	504	643	439	445	320	461	688	152	565	366	741	772	330	642	584	757	315
2013	500	Non-Omani,	504	643	491	502	550	404	636	311	565	308	690	719	446	384	584	810	258
2013	501	Non-Omani,	504	643	491	502	550	575	688	463	408	366	690	0	446	384	584	704	315
2013	502	Non-Omani,	504	591	330	559	320	404	636	463	408	308	690	612	388	537	584	645	258
2013	503	Omani,	504	643	439	559	320	287	688	410	511	366	794	772	446	642	584	757	372
2013	504	Omani,	504	0	439	559	320	461	688	463	511	366	741	0	446	282	584	757	315
2013	505	Omani,	504	643	491	392	398	575	688	463	511	366	690	0	562	384	507	810	429
2013	506	Omani,	504	591	439	559	320	404	636	152	408	308	640	719	388	537	584	645	205
2013	507	Omani,	504	643	0	502	550	575	584	463	511	366	690	612	446	384	584	757	90
2013	508	Omani,	504	643	491	502	475	404	584	410	511	366	690	666	388	384	584	810	90
2013	509	Omani,	504	643	544	502	475	575	584	410	511	366	690	719	388	384	507	757	490
2013	510	Omani,	504	643	544	502	475	575	584	152	511	366	690	719	388	384	0	757	90
2013	511	Omani,	504	540	491	445	475	575	688	152	511	366	690	719	562	384	584	645	429
2013	512	Omani,	504	643	491	502	475	632	584	516	511	366	690	719	388	384	584	810	90
2013	513	Omani,	504	643	491	502	398	575	636	410	460	366	690	719	446	384	584	704	429
2013	514	Omani,	504	643	439	502	475	575	688	675	511	308	690	719	388	384	584	757	147
2013	515	Omani,	504	643	439	559	320	461	740	410	511	480	640	719	388	537	584	645	372
2013	516	Omani,	504	643	439	230	320	461	688	569	511	250	794	666	446	642	584	645	315
2013	517	Omani,	504	643	439	559	320	461	688	463	511	366	794	772	446	537	507	757	315
2013	518	Omani,	504	643	439	559	320	461	636	463	460	366	794	772	446	642	584	704	315
2013	519	Omani,	452	643	491	502	860	686	688	410	460	366	690	719	388	384	584	704	90
2013	520	Omani,	504	643	491	502	320	461	688	463	511	366	690	719	446	384	584	645	315
2013	521	Omani,	504	0	491	502	630	404	0	410	511	366	690	719	562	384	584	810	429
2013	522	Omani,	504	643	439	392	320	461	636	463	511	366	794	719	446	537	584	704	147
2013	523	Omani,	504	643	439	502	320	461	636	463	408	308	690	666	388	537	584	645	147
2013	524	Omani,	504	643	439	559	320	461	636	463	460	366	640	612	504	537	584	592	205
2013	525	Non-Omani,	504	643	439	559	320	461	636	410	408	366	590	772	446	537	584	645	258
2013	526	Non-Omani,	504	643	439	559	320	287	636	410	565	250	741	719	446	537	584	645	258
2013	527	Non-Omani,	504	643	439	559	320	461	636	463	511	366	690	666	446	537	584	810	258
2013	528	Non-Omani,	504	643	439	559	320	461	636	675	353	134	741	612	446	333	0	535	258
2013	529	Non-Omani,	504	643	439	559	320	461	688	152	460	366	741	772	446	485	584	757	315
2013	530	Non-Omani,	504	591	491	502	550	120	584	463	511	192	690	719	504	384	584	704	90
2013	531	Omani,	504	643	330	559	320	461	688	410	511	366	741	772	446	642	584	757	315
2013	532	Omani,	504	643	491	346	475	404	584	410	511	366	690	666	388	384	584	810	258
2013	533	Omani,	504	643	439	559	320	461	688	463	511	366	690	772	446	642	584	757	315
2013	534	Omani,	504	643	491	502	550	575	688	463	511	308	690	719	446	384	584	704	90
2013	535	Omani,	504	591	330	559	550	404	636	410	408	308	690	612	388	537	584	645	205
2013	536	Non-Omani,	504	643	491	502	550	287	688	410	353	308	690	719	446	384	584	592	147
2013	537	Omani,	504	643	330	559	320	461	636	152	408	366	640	719	446	485	507	645	258
2013	538	Omani,	504	643	330	559	320	461	688	463	511	366	794	772	446	642	584	757	315
2013	539	Omani,	504	643	491	502	475	575	584	675	511	366	690	719	388	384	584	645	315
2013	540	Omani,	504	643	491	502	550	404	688	410	565	308	690	719	446	384	584	704	429
2013	541	Non-Omani,	504	643	330	559	320	404	688	516	511	424	794	0	446	642	584	592	315
2013	542	Non-Omani,	504	643	330	559	320	461	688	410	460	366	794	772	446	642	584	757	90
2013	543	Omani,	504	643	330	559	320	461	636	410	511	366	640	719	388	537	507	645	147
2014	544	Non-Omani,	504	643	439	559	320	461	636	410	565	480	690	878	446	537	430	645	90
2014	545	Omani,	504	591	491	502	320	518	0	463	511	366	690	825	446	384	0	0	540
2014	546	Non-Omani,	504	643	439	559	320	461	810	410	511	366	741	878	388	642	430	757	205
2014	547	Non-Omani,	504	0	491	445	550	575	636	360	460	366	590	825	330	537	430	645	0
2014	548	Omani,	504	643	491	502	320	518	584	463	511	366	690	825	446	384	283	0	600
2014	549	Non-Omani,	504	643	491	502	320	404	0	463	565	308	690	0	446	384	0	704	429
2014	550	Omani,	504	643	439	559	398	461	740	410	511	366	741	878	388	693	430	757	315
2014	551	Omani,	504	643	0	559	550	461	688	410	460	366	690	931	388	537	430	704	315
2014	552	Non-Omani,	504	643	439	559	320	461	0	410	565	366	794	772	446	642	430	757	315
2014	553	Non-Omani,	504	643	439	559	320	404	0	410	511	480	690	719	446	537	283	592	315
2014	554	Omani,	504	643	439	559	550	461	0	463	677	308	794	772	330	485	430	592	90
2014	555	Omani,	504	643	439	559	320	461	636	463	408	366	640	719	330	537	0	0	90
2014	556	Non-Omani,	504	643	439	502	320	404	688	463	460	366	690	719	0	693	584	704	258
2014	557	Non-Omani,	0	643	544	559	320	461	0	410	511	134	690	719	0	537	584	757	429
2014	558	Omani,	504	0	439	559	320	461	688	0	353	134	0	0	0	384	507	757	258
2014	559	Omani,	0	643	384	502	320	120	0	463	460	134	690	612	0	642	661	0	315
2014	560	Non-Omani,	504	643	491	0	550	404	688	516	565	308	690	719	446	642	584	704	429
2014	561	Omani,	504	643	491	559	320	461	688	410	511	366	794	772	388	384	507	0	315
2014	562	Non-Omani,	504	643	491	559	630	518	688	410	460	366	640	719	0	740	0	645	315
2014	563	Non-Omani,	504	643	439	559	320	461	740	410	511	366	640	666	388	642	584	757	315
2014	564	Non-Omani,	504	540	491	502	398	518	688	569	460	366	690	0	446	537	0	757	372
2014	565	Non-Omani,	504	540	491	502	398	518	688	569	460	366	690	719	446	591	507	0	372
2014	566	Non-Omani,	504	643	491	502	550	632	688	463	460	366	690	666	330	384	507	0	258
2014	567	Non-Omani,	560	643	439	559	398	461	636	410	511	366	690	719	388	537	661	0	147
2014	568	Non-Omani,	452	643	439	502	320	461	636	463	565	308	640	719	330	537	738	645	258
2014	569	Omani,	0	643	330	502	475	461	584	463	511	366	690	719	330	642	430	757	824
2015	570	Omani,	504	643	491	502	320	518	740	258	511	308	794	825	446	384	584	0	890
2015	571	Omani,	504	643	439	445	550	461	636	306	511	480	741	825	446	537	0	0	90
2015	572	Omani,	504	643	439	559	320	461	688	410	511	366	794	825	388	537	584	757	315
2015	573	Non-Omani,	504	643	439	559	630	461	636	410	460	480	690	772	388	537	661	645	90
2015	574	Non-Omani,	504	643	491	445	320	518	584	360	511	366	590	772	330	384	584	645	490
2015	575	Omani,	504	0	0	559	320	461	688	410	460	366	794	878	330	591	661	0	429
2015	576	Omani,	504	643	439	559	320	461	636	410	460	480	741	719	388	333	0	645	710
2015	577	Omani,	504	643	491	502	550	518	688	258	511	308	741	825	446	384	430	0	767
2015	578	Omani,	560	643	439	615	320	461	688	410	511	366	741	772	388	792	360	757	372
2015	579	Non-Omani,	504	643	491	502	550	518	0	463	565	308	690	719	446	537	661	704	429
2015	580	Omani,	504	643	491	502	550	518	688	410	511	308	690	719	446	537	584	757	372
2015	581	Non-Omani,	504	0	439	559	320	461	636	410	565	480	690	825	388	384	0	645	90
2015	582	Non-Omani,	504	643	439	559	320	404	636	410	565	480	590	719	446	333	584	757	429
2015	583	Non-Omani,	504	0	491	502	550	632	688	463	0	366	0	0	330	333	507	704	653
2015	584	Omani,	504	643	439	559	320	461	0	410	460	366	794	772	330	384	0	0	372
2015	585	Omani,	504	643	439	559	320	461	688	410	511	480	640	719	388	384	584	757	372
2015	586	Non-Omani,	504	0	439	559	320	461	688	410	511	480	640	772	388	642	738	592	315
2015	587	Non-Omani,	504	643	491	502	475	518	636	516	511	308	690	719	446	537	584	0	372
2015	588	Non-Omani,	504	643	491	502	550	404	0	463	565	308	690	719	504	384	0	0	429
2015	589	Non-Omani,	504	0	0	559	320	461	688	410	511	480	640	719	678	642	584	810	429
2015	590	Omani,	504	694	439	559	320	461	688	410	511	366	640	719	388	642	430	704	258
2015	591	Omani,	504	0	491	502	398	518	688	410	511	308	690	719	446	740	0	810	710
2015	592	Non-Omani,	504	643	224	0	320	461	0	410	511	366	640	719	388	384	0	0	372
2015	593	Omani,	452	643	439	559	320	461	636	463	623	308	690	719	330	384	430	592	90
2015	594	Non-Omani,	504	643	439	502	550	518	0	463	565	366	794	719	388	333	0	0	429
2015	595	Non-Omani,	504	643	439	559	320	404	636	463	408	308	0	0	330	384	661	0	258
2015	596	Omani,	504	591	439	502	320	461	636	463	408	308	690	772	330	537	430	645	90
2015	597	Omani,	504	643	491	502	550	518	636	463	511	308	690	719	446	792	815	0	429
2015	598	Non-Omani,	504	643	439	502	320	404	636	463	408	308	690	719	330	384	661	645	258
2016	599	Omani,	504	643	439	559	320	461	688	410	511	366	741	0	388	693	584	757	315
2016	600	Omani,	504	643	0	502	320	518	740	410	511	308	690	825	446	384	430	757	767
2016	601	Omani,	504	643	439	559	320	461	0	410	511	366	741	0	388	537	0	0	315
2016	602	Non-Omani,	504	643	491	502	475	518	0	463	511	308	690	772	446	384	584	810	767
2016	603	Non-Omani,	504	643	439	502	320	461	688	410	511	366	741	878	388	642	430	757	90
2016	604	Omani,	504	643	439	445	320	461	636	258	511	480	741	0	388	0	430	645	90
2016	605	Non-Omani,	504	643	491	502	320	518	688	463	511	308	690	772	446	384	430	757	429
2016	606	Omani,	504	643	491	502	398	404	0	463	565	308	690	772	272	384	584	704	372
2016	607	Omani,	504	643	439	559	630	461	688	410	511	480	640	0	388	642	507	757	372
2016	608	Non-Omani,	504	643	439	559	320	461	688	410	511	366	794	825	388	642	0	757	315
2016	609	Omani,	504	643	439	559	320	461	0	410	511	366	0	825	388	435	0	757	315
2016	610	Non-Omani,	452	643	491	502	320	404	0	463	565	308	741	772	446	384	360	0	429
2016	611	Non-Omani,	504	643	439	559	320	461	740	410	511	366	847	825	388	0	507	757	315
2016	612	Non-Omani,	504	643	439	559	398	461	636	410	460	366	690	666	446	537	0	0	90
2016	613	Non-Omani,	504	643	439	559	320	461	636	410	511	480	794	772	446	384	584	704	315
2016	614	Non-Omani,	504	591	491	502	550	404	688	463	0	308	690	719	446	591	584	704	0
2016	615	Non-Omani,	504	643	491	502	550	404	740	463	565	308	690	719	446	537	584	0	429
2016	616	Non-Omani,	504	643	0	502	550	632	688	463	460	366	690	719	330	485	584	704	653
2016	617	Omani,	504	643	439	559	320	461	688	410	511	366	794	772	388	384	584	757	315
2016	618	Omani,	504	643	439	615	320	461	688	410	511	366	741	772	272	384	584	757	372
2016	619	Non-Omani,	504	643	491	502	550	632	688	463	460	366	690	719	330	384	584	704	653
2016	620	Omani,	504	643	0	559	320	461	688	410	511	480	640	719	388	537	507	757	372
2016	621	Non-Omani,	504	0	439	559	320	461	688	410	511	366	741	772	330	333	0	757	372
2016	622	Non-Omani,	504	643	439	559	398	461	636	410	511	366	690	719	388	333	584	645	147
2016	623	Omani,	504	643	439	559	320	461	636	360	511	366	640	719	388	384	584	645	90
2016	624	Omani,	504	643	491	502	550	518	688	463	565	308	690	719	446	485	584	757	490
2016	625	Omani,	504	643	491	502	550	404	0	463	565	308	690	719	446	642	0	0	429
2016	626	Omani,	0	0	439	559	320	461	688	463	623	480	0	0	388	537	815	757	372
2016	627	Non-Omani,	504	0	491	502	550	575	688	463	460	366	690	719	330	384	584	704	0
2016	628	Non-Omani,	504	643	491	502	550	518	584	463	511	366	690	719	446	333	0	757	490
2016	629	Omani,	504	643	384	559	320	461	636	410	460	480	741	612	388	384	584	704	315
2016	630	Non-Omani,	504	643	439	559	320	461	688	410	511	480	640	719	388	435	584	704	372
2016	631	Non-Omani,	504	643	439	559	320	461	688	410	511	480	640	719	388	642	584	757	372
2016	632	Omani,	504	591	491	502	550	518	688	205	511	308	690	0	330	537	584	757	710
2016	633	Non-Omani,	504	540	439	502	320	461	636	410	511	480	690	0	0	384	0	645	372
2016	634	Omani,	452	643	491	502	320	632	688	463	460	366	690	719	330	384	584	0	600
2016	635	Omani,	504	643	491	502	550	632	688	516	460	366	690	0	330	384	0	704	653
2016	636	Non-Omani,	504	643	439	559	320	461	0	410	511	0	741	772	388	537	0	0	315
2016	637	Omani,	452	643	491	502	245	632	0	463	460	366	690	719	214	537	661	704	600
2016	638	Non-Omani,	504	643	439	559	320	461	688	410	511	480	640	719	388	384	0	592	315
2016	639	Omani,	504	643	491	502	550	461	688	258	511	308	690	719	446	537	584	810	710
2016	640	Omani,	504	643	491	502	320	461	0	410	511	366	741	0	388	384	0	0	90
2016	641	Non-Omani,	504	591	439	559	320	461	636	463	408	366	640	666	620	384	0	645	767
2016	642	Omani,	504	643	491	502	475	518	0	463	511	366	640	719	330	537	815	0	429
2016	643	Omani,	504	591	439	502	320	461	636	463	408	308	690	772	330	384	0	645	90
2016	644	Non-Omani,	348	643	439	559	320	461	636	410	511	366	640	719	0	384	738	645	258
2016	645	Omani,	504	643	491	502	475	518	0	463	511	366	640	719	330	642	0	0	429
2016	646	Non-Omani,	452	0	439	559	320	461	0	516	623	308	690	719	330	384	430	0	90
2016	647	Non-Omani,	504	643	439	559	320	461	688	410	565	366	900	719	0	384	430	704	258
2016	648	Omani,	504	643	439	559	320	461	688	410	0	480	640	0	388	384	892	757	372
2017	649	Omani,	504	643	330	559	550	632	688	410	460	134	690	878	330	333	584	704	600
2017	650	Omani,	504	643	439	559	320	461	0	410	511	366	794	825	446	0	0	704	90
2017	651	Non-Omani,	504	643	439	0	320	461	0	410	511	366	847	825	446	537	584	0	315
2017	652	Omani,	452	591	491	502	0	632	0	463	460	366	690	772	330	384	0	704	600
2017	653	Non-Omani,	504	643	439	559	320	461	636	410	460	480	741	825	388	537	430	645	90
2017	654	Non-Omani,	504	643	439	559	550	404	0	410	565	366	741	825	0	0	584	0	372
2017	655	Omani,	504	643	439	559	320	461	688	410	511	366	847	0	446	537	584	757	315
2017	656	Omani,	504	643	491	502	320	518	688	258	565	308	794	0	446	435	815	757	824
2017	657	Non-Omani,	504	643	439	559	320	461	0	410	460	480	640	719	388	537	661	757	372
2017	658	Omani,	504	643	439	559	320	461	740	410	511	366	741	825	388	0	661	0	315
2017	659	Omani,	504	643	439	559	320	461	0	410	511	366	847	825	388	537	584	0	372
2017	660	Non-Omani,	504	643	439	559	320	461	688	410	460	366	794	0	388	0	0	757	315
2017	661	Non-Omani,	504	643	439	559	475	461	636	0	511	134	741	666	388	333	584	645	205
2017	662	Non-Omani,	504	643	491	502	550	518	636	463	511	308	690	772	446	384	0	757	429
2017	663	Omani,	504	540	491	502	320	518	0	463	511	366	640	772	446	384	0	0	429
2017	664	Non-Omani,	504	643	491	502	320	404	0	463	565	308	690	772	446	384	584	0	429
2017	665	Non-Omani,	504	643	491	502	320	632	688	463	460	366	690	825	330	384	584	704	653
2017	666	Omani,	504	643	439	559	550	461	688	410	511	366	690	825	388	740	584	757	315
2017	667	Omani,	504	643	439	559	550	461	636	410	565	366	640	772	388	537	430	645	90
2017	668	Omani,	504	0	491	502	320	518	688	258	0	308	690	0	446	384	430	0	372
2017	669	Omani,	504	643	491	502	320	404	810	463	565	308	690	772	504	384	360	704	429
2017	670	Non-Omani,	504	643	491	502	320	518	688	0	408	134	690	772	0	384	815	757	429
2017	671	Non-Omani,	504	643	439	559	550	461	0	410	460	366	794	825	330	591	584	757	653
2017	672	Omani,	504	643	439	559	550	461	0	463	511	366	794	825	330	537	0	757	315
2017	673	Omani,	504	643	439	559	550	461	688	410	408	480	640	772	388	642	507	0	372
2017	674	Non-Omani,	504	643	439	559	320	461	688	410	511	366	847	931	388	642	0	0	315
2017	675	Omani,	504	643	439	559	398	461	688	410	511	366	794	825	388	642	430	757	315
2017	676	Non-Omani,	504	643	439	559	550	461	0	410	511	366	690	772	388	642	584	757	315
2017	677	Omani,	504	643	491	502	166	518	0	306	511	308	690	772	446	384	661	757	600
2017	678	Omani,	504	643	439	559	320	461	688	410	511	480	640	825	388	642	507	0	315
2017	679	Non-Omani,	504	643	439	559	320	461	688	410	511	480	640	825	388	537	584	757	372
2017	680	Omani,	504	591	0	502	550	518	636	205	511	308	690	0	446	384	815	757	90
2017	681	Omani,	504	643	439	559	320	461	636	463	460	480	794	612	388	333	430	645	258
2017	682	Non-Omani,	504	643	439	615	320	461	0	410	511	366	590	719	388	537	430	757	205
2017	683	Non-Omani,	504	643	491	502	320	404	740	463	565	308	741	772	446	384	0	704	315
2017	684	Omani,	504	643	439	559	320	461	0	410	511	480	640	719	388	693	430	757	372
2017	685	Omani,	504	643	491	502	320	518	688	258	511	366	690	772	446	384	892	757	653
2017	686	Non-Omani,	504	643	439	559	550	404	636	258	565	366	690	719	446	384	360	704	258
2017	687	Non-Omani,	504	643	439	559	320	461	0	410	511	366	900	772	388	384	0	757	315
2017	688	Non-Omani,	504	643	491	0	320	461	688	410	511	480	640	719	388	537	584	704	372
2017	689	Non-Omani,	0	591	491	502	320	461	688	463	511	134	690	772	330	384	584	0	258
2017	690	Omani,	504	0	439	502	475	518	0	463	511	366	690	719	330	642	430	0	824
2017	691	Omani,	0	643	544	502	245	461	688	0	511	134	640	719	0	537	0	645	372
2017	692	Omani,	504	643	439	502	320	461	0	410	565	366	640	719	446	642	0	0	90
2017	693	Non-Omani,	504	643	439	0	320	461	688	410	565	366	847	772	330	384	507	757	90
2017	694	Omani,	504	643	439	559	245	461	0	360	511	366	640	772	330	384	0	0	90
2017	695	Non-Omani,	504	643	439	559	320	461	688	410	565	366	690	772	330	642	0	0	258
2018	696	Omani,	504	643	439	559	320	461	0	410	565	480	690	825	446	537	661	0	258
2018	697	Non-Omani,	504	643	439	559	550	461	0	410	511	480	640	0	388	642	430	916	372
2018	698	Omani,	504	0	491	502	320	404	688	516	565	308	690	0	446	384	0	704	429
2018	699	Non-Omani,	504	643	439	559	320	461	0	410	460	480	741	612	388	333	584	0	90
2018	700	Non-Omani,	504	643	0	559	320	461	688	410	511	366	794	878	214	537	0	0	315
2018	701	Omani,	504	643	439	559	320	461	740	410	511	366	690	772	388	740	661	0	315
2018	702	Omani,	504	643	439	559	320	404	636	410	511	366	590	772	388	537	584	645	372
2018	703	Omani,	504	0	439	559	320	461	636	463	408	366	640	878	330	537	0	645	490
2018	704	Non-Omani,	504	643	384	559	550	461	0	410	511	480	741	719	388	333	584	0	90
2018	705	Non-Omani,	504	643	439	559	320	461	688	410	511	424	640	772	388	642	584	645	315
2018	706	Non-Omani,	504	643	439	559	320	461	688	410	511	366	794	878	388	333	507	757	147
2018	707	Omani,	504	0	439	559	320	461	0	410	460	366	794	825	446	591	584	757	315
2018	708	Non-Omani,	504	643	439	559	320	461	0	410	565	480	794	0	446	591	430	0	315
2018	709	Omani,	504	0	439	559	320	461	636	410	511	480	794	825	446	537	0	645	0
2018	710	Non-Omani,	504	643	491	502	320	632	0	463	460	366	690	825	330	384	507	0	490
2018	711	Non-Omani,	504	643	439	559	630	461	636	410	565	366	640	878	388	0	0	645	147
2018	712	Non-Omani,	504	643	439	559	630	461	636	410	460	480	741	719	388	333	430	645	90
2018	713	Non-Omani,	504	643	439	559	320	461	0	410	511	480	847	878	446	642	661	704	315
2018	714	Non-Omani,	504	643	439	559	320	461	636	410	511	366	690	772	388	537	584	0	767
2018	715	Omani,	504	540	491	502	320	518	0	463	565	366	690	772	504	384	0	592	429
2018	716	Non-Omani,	504	0	491	502	550	404	688	463	565	308	741	825	446	384	584	704	0
2018	717	Omani,	504	643	491	502	320	404	0	463	511	308	690	825	388	384	584	757	429
2018	718	Non-Omani,	504	643	491	502	320	404	688	463	565	308	690	772	446	384	0	0	600
2018	719	Non-Omani,	504	643	439	559	320	461	636	410	511	366	741	772	388	537	430	704	147
2018	720	Omani,	504	643	491	502	550	461	636	258	511	308	690	719	446	384	507	0	710
2018	721	Non-Omani,	504	643	439	559	320	461	0	410	511	480	640	719	388	384	0	0	315
2018	722	Non-Omani,	452	0	439	559	320	461	688	410	408	366	0	0	388	642	507	757	315
2018	723	Non-Omani,	504	0	491	502	475	518	688	410	511	366	690	719	446	384	430	645	0
2018	724	Omani,	504	591	439	502	320	461	636	463	408	308	690	772	330	384	0	645	90
2018	725	Omani,	452	643	439	559	320	461	0	463	565	308	690	666	330	642	0	0	90
2018	726	Omani,	504	643	491	502	475	518	584	463	511	366	640	719	330	384	0	810	429
2018	727	Omani,	504	643	491	502	550	518	636	463	511	308	690	719	446	384	815	810	429
2018	728	Non-Omani,	504	540	0	502	398	461	688	410	511	366	640	719	446	384	507	0	429
2018	729	Non-Omani,	504	643	439	502	320	404	636	463	0	308	690	666	0	537	1	645	0
2018	730	Non-Omani,	504	643	491	502	550	632	688	463	460	366	690	719	330	591	584	0	653
2018	731	Non-Omani,	504	643	439	559	320	461	688	410	511	366	690	825	330	384	430	757	315
2018	732	Non-Omani,	504	643	491	502	550	518	584	463	511	366	794	719	562	435	430	0	490
2018	733	Non-Omani,	452	591	439	0	320	461	636	410	565	366	741	719	504	384	507	704	90
2018	734	Non-Omani,	504	643	491	502	320	461	688	0	511	366	690	719	330	642	892	0	258
2018	735	Non-Omani,	504	643	439	559	320	461	636	410	460	366	640	719	330	384	661	0	258

## Sheet: Toolkit_data
pop	MIRU2	MIRU27	MIRU24	MTUB29	MIRU4	ETRB	MIRU39	MIRU23	MIRU40	MTUB30	MIRU10	MIRU16	MTUB39	MIRU26	MIRU20	MIRU31	MTUB21
2008 Non-Omani, 1	504	643	491	445	475	632	636	360	460	366	590	719	562	537	584	645	147
2008 Non-Omani, 10	504	643	439	502	398	461	688	410	511	424		825	446	435	584	535	90
2008 Non-Omani, 11	504	643	439	502	320	461	688	410	460	424	794	772	446	435	584	757	315
2008 Non-Omani, 113	504	540	491	502	320	404	688	463	565	424	690	666		384	584		429
2008 Non-Omani, 114	400	540	439	445	320	461	636	410	623	424	690		446	384	584		315
2008 Non-Omani, 119		540	439	502	320	461		410	353	424	640	772	446	642	584	645	315
2008 Non-Omani, 12	504	643	439	559	475	461	688	410	460	424	640	719	330	384	584	757	258
2008 Non-Omani, 120	504	643	491	502	320	575	584	463	511	308	794		446	384	584	757	490
2008 Non-Omani, 128	504	643	491	502	550	404	688	463	511	366	690	719	446	384	584	704	315
2008 Non-Omani, 129	504	540	491	346	475	575	688	463	460	480	690	719		384	584	757	429
2008 Non-Omani, 13	452	643	439	445	320	404	584	360	677	366	690	719	388	537	430		258
2008 Non-Omani, 22	504	643	439	445	166	575		463	353	192	640	719	388	537	584		90
2008 Non-Omani, 23	504	643	491	502	320	632	584	463	511	480	794	666	504	384	584	757	258
2008 Non-Omani, 24	504	643	439	559	320	461	688	410	460	424	794	772	446	642	584	757	372
2008 Non-Omani, 3	504	643	439	559	550	686	636	410	408	480	590	719	446	537	584	645	90
2008 Non-Omani, 30	504	643	491	502	550	575	688	463	460	366	690	719	446	384	430	810	205
2008 Non-Omani, 31	504	643	491	502	475	686	636	569	460	366	690	719	388	384	584	704	653
2008 Non-Omani, 32	504	540	491	502	320	461	688	463	511	366	690	772	446	384	430	592	429
2008 Non-Omani, 33	452	643	439	445	320	461	636	463	460	424	690	719	504	537	584	535	258
2008 Non-Omani, 34	504	643	439	559	320	461	688	410	511	424	590	772	446	537	584	757	315
2008 Non-Omani, 35	504	643	491	502	550	177	688	463	565	424	690		562	384	584	645	429
2008 Non-Omani, 36	504	643	439	559	320	461	688	410	511	424	794	719	446	537	584	757	205
2008 Non-Omani, 37	504	643	439	445	320	461	636	410	408	480	640	666	446	485	584	645	429
2008 Non-Omani, 38	504	540	491	502	398	575	740	463	460	424	690	719	388	333	661	757	653
2008 Non-Omani, 39	504	643	491	502	475	404	584	311	565	308		719	446	384	584	757	429
2008 Non-Omani, 4	504	643	439	559	320	461	636	205	460	250	741	666	388	333	584	645	258
2008 Non-Omani, 40	504	643	439	392	166	461	688	410	460	424	794	772	330	642	584	757	315
2008 Non-Omani, 41	504	643	439	559	320	461	584	410	565	424	741	666	446	333	584	592	258
2008 Non-Omani, 42	504	643	491	346	320	575	688	463	460	308	640	719	388	384	584	757	315
2008 Non-Omani, 43	504	591	439	392	166	177	636	410	565	480	690	719	446	333	584	704	205
2008 Non-Omani, 44	504	643	439	502	320	461	688	410	565	424	741		446	485	584	757	90
2008 Non-Omani, 45	504	643	491	392	245	575	688	516	460	308	690	719	446	384	584	704	258
2008 Non-Omani, 46	504	643	491	502	550	575	688	516	460	480	690	719	330	384	584		315
2008 Non-Omani, 47	504	643	439	346	550	461	688	410	511	424	794	772	330	435	584	757	315
2008 Non-Omani, 48	452	643	439	559	320	461	636	463	565	366	640		446	537	584	592	258
2008 Non-Omani, 49		643		502	320	461	636	516	511	480	690			384			490
2008 Non-Omani, 5	504	643	491	392	550	575	584	463	460	366	690	719	388	384	584	704	315
2008 Non-Omani, 50	452	643	439	559	320	461	688	311	511	424		772	446	537	584	757	315
2008 Non-Omani, 51	504	643	491	392	166	461	688	463	460	424	640		446	537	584	757	372
2008 Non-Omani, 52	452	643		559	166	461	584	463	677	424	690	719	388	537		757	315
2008 Non-Omani, 53	504	643	439	502	320	461	688	205	511	366	794	772	388	537	430	757	315
2008 Non-Omani, 54	504	643	491	289	550	575	688	463	353	424		719	388	384	584	757	147
2008 Non-Omani, 55	504	643		502	475	404	636	569	565	366	690	719		384	584	592	490
2008 Non-Omani, 56	504	643	439	392	166	518	584	463	511	250	794	719	330	384	584	645	205
2008 Non-Omani, 57	504	643	491	502	320	461	688	410	511	366	741		330	384	584		429
2008 Non-Omani, 58	504	643	491	502	166	575	584	463	511	480	690	719		384	584	757	315
2008 Non-Omani, 59	504	643	439	502	166	575	688	463	460	480	690	719		384	584	757	490
2008 Non-Omani, 6	504	643	384	445	550	461	636	463	511	424	741	666	562	333	584	645	315
2008 Non-Omani, 60	504	643	439	559	320	461	688	311	511	424	741	772	446	435	584	704	205
2008 Non-Omani, 61	504		439	559	320	461	688	569	511	308	537	719	446	642	584	645	315
2008 Non-Omani, 62	504	643	439	502	550	404	740	463	565	424	690	719	446	384	584		490
2008 Non-Omani, 63	504	643	491	445	475	461	584	463	511	424	640	719	330	384			600
2008 Non-Omani, 64	504	643	439	502	320	404	688	258	565	480	690	719	446	384	584	704	429
2008 Non-Omani, 7	504	643	330	502	166	404	636	410	511	366	590	719		384	584	645	205
2008 Non-Omani, 92	504	643	439	559	320	461	688	410	511	424	794	772	446	591	584	757	315
2008 Omani, 100	504	643	439	559	320	461	636	410	511	480	640	772	446	485	584	704	372
2008 Omani, 101	504	643	439	392	166	461	740	410	511	424	741	772	562	537	584	757	315
2008 Omani, 102	504	643	439	392	320	575	636	410	408	480	741		388	642	584		372
2008 Omani, 103	504	643	439	502	320	461	636	410	408	538	640	666	446	485	584		258
2008 Omani, 104	504	643	491	392	550	404	688	410	565	308	690	719	214	384	584	704	429
2008 Omani, 105		643	439	502		461	636	463	511	308	537		446	384	430	757	205
2008 Omani, 106	504	540	491	502	320	575	688	463	511	424	690	719	562	384	584	592	429
2008 Omani, 107	504	643	439	502	320	461	636	410	511	424	640	719	446	537	584	645	258
2008 Omani, 108	504	643	439	559	320	461	688	410	511	308		825	330	485	584	757	90
2008 Omani, 109	504	643	439	559	320	461	740	410	511	308	741	772	330	642	584	757	315
2008 Omani, 110	504	643	491	502	320	575	688	463	460	308	690	719	388	384	584	757	147
2008 Omani, 111	504	643	491	502	166	404	688	410	511	308	690	719	446	384	584	645	429
2008 Omani, 112	504	643	439	559	320	461	688	410	511	366	847	772		642	584	757	315
2008 Omani, 115	504	643	491	502	398	404	740	463	565	480	690	719	330	384	584	704	205
2008 Omani, 116	504	643	439	559	550	461	636	463	408	480	640	719	446	591	584	645	205
2008 Omani, 117	504	643	491	502	166	404	636	463	565	424	690	719	388	384	584	810	429
2008 Omani, 118	504	643	439	445	166	461	636	410	623	424	640	666	330	333	584	645	205
2008 Omani, 121	504	643	491	346	320	743	636	463	460	366	690	719	504	384	584	704	205
2008 Omani, 122	504	591	439	559	320	404	636	360	408	308	690	666	446	537	584	645	205
2008 Omani, 123	504	643	491	502	245	686	688	463	460	366	690	719	388	384	584	704	600
2008 Omani, 124	504	643	439	559	320	461	688	205	511	424	794	719	446	485	584	757	315
2008 Omani, 125	504	643	439	559	320	461	688	205	511	424	794	719	388	485	584	757	315
2008 Omani, 126	504	643	439	445	320	461	688	410	511	424	794	719	562	435	430	757	315
2008 Omani, 127	504	540	491	502	550	575	688	152	511	308	690	719	330	384	584	592	429
2008 Omani, 130	504	643	439	445	320	461	688	410	511	424	794		446	642	430	757	258
2008 Omani, 131	504			559	320	461		410	511	424	794		504	537		757	258
2008 Omani, 132	504	643	491	502	245	575	740	675	511	480	690	719		384	584	810	315
2008 Omani, 14	504	643	439	445	320	461	636	410	408	538	640	719	562	485	584	645	258
2008 Omani, 15	452	694	439	559	320	461	636	311	623	308	690	719	562	537	584	535	258
2008 Omani, 16	504	643	330	392	320	461	688	410	353	424	847	772		537	584	757	315
2008 Omani, 17	504		439	445	320	461	636	311	511	424	741			537	507	645	205
2008 Omani, 18	504	643	439	445	320	461	688	410	511	308	741	772	388	435	584	757	147
2008 Omani, 19	504	643	491	502	550	575	636	463	460	480	690	719	446	384	584		429
2008 Omani, 2	504	591	439	445	475	461	636	463	460	308	590	719	446	537	584	645	147
2008 Omani, 20	504	643	439	392	320	461	636	463	511	366	690	719	446	537	584	645	147
2008 Omani, 21		643	491	502	166	575	584	360	511	366	690	719		384	584	757	315
2008 Omani, 25	504	643	439	559	550	461	688	410	511	424	741	772	446	642	584		824
2008 Omani, 26	504	591	439	445	320	461	636	258	565	424	537	666	446	537	584	645	205
2008 Omani, 27	504	643	491	502	550	575	688	516	460	366	690	719	446	384	584	757	315
2008 Omani, 28	504	643	491	392	320	461	688	410	460	366		772	330	591	584	645	90
2008 Omani, 29	504	643	439	392	550	461	688	410	511	424	900	772	446	642	584	757	205
2008 Omani, 65	504	643	439	445	320	461	636	311	511	424	741	719	504	537	507	645	258
2008 Omani, 66	452	643	439	392	320	461	636	463	677	366	690	719	388	485	584		258
2008 Omani, 67	504	643	491	502	166	575	688	463	511	308	690	719	446	384	584	757	315
2008 Omani, 68	504	643	439	559	320	461	688	410	511	366	690	772	388	537	584	757	315
2008 Omani, 69	504	643	439	502	320	461	688	410	511	424	794	772	446	435	584	704	205
2008 Omani, 70	504	591	439	502	320	461	688	410	511	308	794	772	446	642	584	757	315
2008 Omani, 71	504	591		502	320	461		410	511	308	794			642		757	315
2008 Omani, 72	504	643	439	502	320	575	688	675	511	480	690	719	446	384	584	810	147
2008 Omani, 73	504	643	439	445	320	461	688	410	511		640	772	330	333	584	757	315
2008 Omani, 74	504	643	491	502	245	404	688	463	565	308	690	719	504	384	584		258
2008 Omani, 75	504	643	491	502	320	461	688	258	565	366	690	719	330	384	584	757	147
2008 Omani, 76	504	643	491	559	320	461	636	463	408	480	640	666	330	435	584	645	258
2008 Omani, 77	504	643	439	392	550	461	688	410	460	366	794	719	388	282	584	592	205
2008 Omani, 78	504	591	439	559	320	461	688	410	511	308	794	666	330	642	584		315
2008 Omani, 79	504	643	439	502	320	404	636	463	408	366	690	666	388	537	584	645	258
2008 Omani, 8	504	643	439	502	320	461	688	410	511	366	847	772	388	435	584	757	315
2008 Omani, 80	504	540	491	559	320	461	688	675		134	741	719	388	537	507		90
2008 Omani, 81	504	643	439	445	320	461	688	258	565	424		772	446	537	584	757	315
2008 Omani, 82	504	643	439	559	320	461	688	410	511	424		772	446	384	584	757	258
2008 Omani, 83	504	643	439	559	320	461	688	410	511	424	690	772	388	485	584		90
2008 Omani, 84	504	643	491	392	320	575	688	675	565	480	690	719	446	384	584	810	205
2008 Omani, 85	504	643	439	445	320	461	636	410	460	250	741	719	504	537	584	645	258
2008 Omani, 86	504	643	439	392	320	461	636	463	408	480	640	719	446	180	584	645	205
2008 Omani, 87	504	643	439	559	320	461	688	410	511	250	590		504	693	584	757	315
2008 Omani, 88	504	643	491	392	320	404	740	258	565	308	690	719	388	384	584	704	147
2008 Omani, 89	504	643	439	445	320	461	688	410	511	424	741	772	446	537	584		315
2008 Omani, 9	504	643	491	502	475	575	584	463	511	366	690		330	384	584	645	258
2008 Omani, 90	504	591	491	502	320	632	688	463	511	308	690	719	446	384	507	757	429
2008 Omani, 91	400	540	439	502	166	461	584	410	300	308	690	719	330	384			147
2008 Omani, 93	504	643	439	559	320	461	688	410	565	366	847	772	388	333	584	645	258
2008 Omani, 94	504	643	439	559	550	461	688	410	511	424	794	772	446	642	584	757	315
2008 Omani, 95	504	643	439	559	320	461	740	205	511	424	741	772	446	537	584	757	600
2008 Omani, 96	504	643	439	559	320	461	584	410	511	480	640	719	446	642	584	757	315
2008 Omani, 97	504	643	439	559	245	461	636	360	511	366	640	772	446	485	584	704	258
2008 Omani, 98	504	643	491	502	475	575	584	463	511	308	640	719	388	384	584	810	205
2008 Omani, 99	504	643	491	502	550	575	688	675	511	480	690	719	446	384	584	810	205
2009 Non-Omani, 133	504	694	439	502	550	518		410	511	366	690		214	537	584	757	205
2009 Non-Omani, 142	504	643	384	502	550	518	636	311	511	366	794		446	384	584	757	205
2009 Non-Omani, 143	560	643	491	502	398	404	688	463	511	366	690	772		384	584	757	90
2009 Non-Omani, 144	504	643	439	559	320	461	636	410	511	424	690	719	388	642		757	90
2009 Non-Omani, 145	504	643	439	559	320	461	688	410	511	366	690	719		435	584	704	315
2009 Non-Omani, 146	504	643	439	445	320	461	636	410	511	366	794	612	388	231	584	757	315
2009 Non-Omani, 147	504	643	491	502	550	344	688	205	511	366	690	719	446	642	584	757	258
2009 Non-Omani, 148	504	643	439	559	166	461	636	410	511	480	794	719	504	537	584	645	258
2009 Non-Omani, 149	504	643	384	559	320	230	740	410	511	480	741	719	446	333	584	645	205
2009 Non-Omani, 156	504	643	439	559	320	461	688	410	511	480	590	772	446	642	584	757	205
2009 Non-Omani, 161	504	643	330	559	166	461		410	511	480	794	719	446	384	584	645	258
2009 Non-Omani, 162	504	643	439	559	320	404	688	258	565	366	640	719	446	485	507	704	258
2009 Non-Omani, 163	504	643	439	559	320	461	688	410	511	366	741	719		740	584	757	147
2009 Non-Omani, 164	504	643	439	559	320	461	688	410	511	480	794	719	446	642	584	704	315
2009 Non-Omani, 179	504	643	439	559	320	287	688	410	511	366	741	772	504	485	584	757	90
2009 Non-Omani, 181	504	643	491	502	550		636	463	460	366	690	719	446	384	584	757	315
2009 Non-Omani, 182	504	643	439	502	550	344	636	463	511	538	690	719	388	384		810	258
2009 Non-Omani, 183	504	643	439	559	320	404	688	360	511	366	690	772	446	537	584	645	90
2009 Non-Omani, 184	504	643	439	559	320	230	636	311	460	366	794	612	446	537	584	704	258
2009 Non-Omani, 185	504	643	439	559	320	461	688	463	408	366	640	772	446	333	584	645	258
2009 Non-Omani, 186	504	643	439	559	320	461	688	463	623	366	690	719	330	384	584	592	258
2009 Non-Omani, 187	504	643	439	559	320	230	584	410	511	480	690	719	446	642	584	757	205
2009 Non-Omani, 188	504	489	544	502	475	575	584	311	511	366	690	719	388	384	584	757	490
2009 Non-Omani, 189	504	591	491	502	398	575	688	463	460	308	690	719	446	384	584	704	147
2009 Non-Omani, 190	560	643	491	502	550	461	636	463	511	366	690	719	446	384	584	757	258
2009 Non-Omani, 191	504	643	439	445	166	287	688	410	511	366	794	719	446	591	584	645	90
2009 Non-Omani, 192	504	643	439	559	320	461	688	410	511	480	741	719		384		645	147
2009 Non-Omani, 193	504	643	439	559	320	461	688	463	511	366	794	825		693	584	757	90
2009 Non-Omani, 194	452	643	491	559	550	575	636	463	245	308	690	719	446	384	584	757	147
2009 Non-Omani, 195	504	643	439	445	320	461	636	258	511	366	741	719	388	642	584	757	147
2009 Non-Omani, 196	504	643	439	559	320	461	584	410	460	366	741	666	446	384	584	757	315
2009 Non-Omani, 197	504	694	439	559	320	404	584	360	511	366	690	719	446	384		645	205
2009 Non-Omani, 198	504	643	439	559	320	461	584	410	511	366	794	719	446	642	584	757
2009 Non-Omani, 199	504	643	439	559	320	461	688	410	460	480	794	772	446	642	584	704	147
2009 Non-Omani, 200	504	643	439	559	166	461		410	511	480	741	719		384	584	704	315
2009 Non-Omani, 201	504	643	439	445	320	461	584	410	511	366	794	719	388	384	584	757	205
2009 Non-Omani, 202	504	643	544	502	550	461	636	463	511	366	690	719	388	384	584	645	315
2009 Non-Omani, 203	504	643	491	502	704	177	636	463	511	308	690		446	384	584	810	90
2009 Non-Omani, 204	504	643	491	502	630	404	636	463	565	366	690	772	504	384	584	704	315
2009 Non-Omani, 205	504	643	491	502	550	575	636	675	511	308	690		330	384	584	810	372
2009 Non-Omani, 206	504	643	491	502	550	404	636	463	565	308	690	719	330	384	584	757	429
2009 Non-Omani, 207	504	643	491	502	550	575	584	258	511	366	690	719	562	485	584	757	315
2009 Non-Omani, 208	452	643	491	502	398	404	688	463	565	308	690	772	330	384	584	645	429
2009 Non-Omani, 209	452	643	439	559	320	404	636	463	677	308	640	666	388	537	584	592	147
2009 Non-Omani, 210	504	643	439	559	320	461	688	410	408	366	640	772		537	584	645	205
2009 Non-Omani, 211	452	643	330	559	320	461	636	463	565	308	690	719	330	537	584	592	258
2009 Non-Omani, 246	504	643	439	502	550	575	584	311	511	366	690	719	504	384	584	757	205
2009 Non-Omani, 247	504	643	330	502	320	404	688	410	565	366	590	719	388	485	584	645	315
2009 Non-Omani, 248	504	643	439	502	320	404	688	410	565	366	590	719	446	693	584	645	315
2009 Non-Omani, 249	504	643	439	559	398	461	636	463	408	366	640		446	485	584	645	147
2009 Non-Omani, 250	560	643	491	502	550	575	688	311	511	366	690		330	231	584	757	258
2009 Non-Omani, 251	504	643	491	502	550	404	688	311	565	308	690	719	446	384	584	757	258
2009 Non-Omani, 252	504	643	384	502	398	404	636	463	565	308	690	612	446	384	584	704	429
2009 Non-Omani, 253	504	643	439	445	320	461	688	311	565	480	741	719	446	537	507	645	205
2009 Non-Omani, 277	504	643	439	559	320	287	636	410	460	366	794	719	446	435	584	757	315
2009 Non-Omani, 278	504	643	544	502	475	404	636	410	511	424	690			384	584	704	372
2009 Non-Omani, 279	504	643	491	502	550	518	636	463	511	366	690	612	504	384	584	757	205
2009 Omani, 134	504	643	439	559	166	461	688	410	353	308	741	772	504	384	584	645	205
2009 Omani, 135	504	643	439	502	398	461	636	410	408	424	640	719	330	537	584	645	147
2009 Omani, 136	504	643	439	559	320	461	584	410	623	366	590	719	388	537	584	592	205
2009 Omani, 137	504	643	439	559	320	461	636	258	565	366	847	772	504	333	584	704	258
2009 Omani, 138	504	643	491	502	550	575	584	258	511	308	690	719	388	384	584	757	372
2009 Omani, 139	504	643	439	559	320	404	636	463	408	308	590	719	388	537	584	645
2009 Omani, 140	504	591	330	559	320	404	636	463	408	308	690		446	537	584	645	258
2009 Omani, 141	452	643		559	320	461	636	463	408	308	690	612	446	537	584	645	258
2009 Omani, 150	504	643	439	559	320	461	636	258	565	366	794	612		384	584	757	315
2009 Omani, 151	504	643	439	502	320	461	688	258	511	480	794	772	330	642	584	757	258
2009 Omani, 152	504	643	439	559	320	461	688	410	565	366	640	825		537	507	645	205
2009 Omani, 153	291	643	439	559	398	461	584	463	565	366	640	719	446	537	584		90
2009 Omani, 154	504	643	330	559	320	461	636	258	511	480	690	612	562	485	584	757	147
2009 Omani, 155	504	643	491	502	550	575	584	463	511	366	794		446	384	584	704	90
2009 Omani, 157	504	643	491	559	550	287	584	463		366	590		446	384	584		205
2009 Omani, 158	504	643	439	445	166	575	688	410	511	366	794	719	446	642	584	704	147
2009 Omani, 159	452	643	544	502	166	404	636	463	623	308	690	719	446	537	584	757	429
2009 Omani, 160	452	643	439	559	320	461	636	463	677	308	690	719	330	485	584	592	258
2009 Omani, 165	504	643	439	559	320	518	584	410	460	366	794	719	562	282	584	757	315
2009 Omani, 166	504	643	439	559	320	461	636	410	460	366	794	719	388	537	584	645	315
2009 Omani, 167	504	643	439	559	320	461	688	258	511	366	741	719	446	435	584	757	315
2009 Omani, 168	504	643	439	445	320	461	584	205	460	366	741	772	446	642	584	645	315
2009 Omani, 169	504	643	491	502	550	632	636	311	511	366	794	719	446	384	584	757
2009 Omani, 170	504	694	544	502	550	177	688	463	511	366	690	772	446	537	584	757	90
2009 Omani, 171	504	643	439	502	320	461	688	410	511	366	690	719	504	591	584	645	90
2009 Omani, 172	504	643	491	502	550	686	688	410	511	366	690	719		384	584	757	372
2009 Omani, 173	504	643	491	502	550	575	636	311	460	366	690	719	330	384	584	704	205
2009 Omani, 174	452	643	439	445	320	461	636	311	460	366	690	719	388	435	584	645	258
2009 Omani, 175	504	489	384	502	550	461	636	516	511	366	690	772	388	485	584	757	90
2009 Omani, 176	504	591	491	502	550	575	688	152	353	308	690	719	330	384	584	810	429
2009 Omani, 177	504	489	491	502	550	575	636	516	511	366	590	772	562	384	584	757	540
2009 Omani, 178	504	643	491	502	550	404	636	675	353	308	690	719	330	384	584	757	258
2009 Omani, 180	504	643	439	559	320	461	636	410	565	366	640	719		537		645	205
2009 Omani, 212	504	643	491	445	320	632	688	360	460	366	590	719	446	537	584	645	147
2009 Omani, 213	504	643	491	502	166	461	636	463	511	366	640	719	330	537	584	810	258
2009 Omani, 214	504	643	439	559	166	461	688	410	511	366	847	719	388	231	584	757	315
2009 Omani, 215	504	643	439	559	320	461	688	410	511	480	640	719	446	384	584	757	315
2009 Omani, 216	504	643	439	559	550	461	688	258	511	366	794	772	446	384	584	757	315
2009 Omani, 217	504	643	439	502	320	461	688	258	511	366	794	772	330	642	584	757	315
2009 Omani, 218	504	643	491	502	550	575	636	360	511	308	690	719	388	435		810	315
2009 Omani, 219	504	643	491	502	398	404	636	152	565	308	690	666		384		757	429
2009 Omani, 220	504	643	439	559	320	404	636	410	511	366	590	719	446	591	584	645	372
2009 Omani, 221	452	643	439	559	320	461	688	463	565	596	690	772	388	591	584	592	205
2009 Omani, 222	504	643	439	502	245	461	636	410	460	480	741	719	504	333	584	645	205
2009 Omani, 223	452	591	439	559	320	177	688	463	623	308	690	772	446	537	584	592	205
2009 Omani, 224	452	643	439	559	320	461	584	463	408	308	690	719	330	384	584	592	258
2009 Omani, 225	504	643	439	559	166	461	688	311	460	366	640	772	388	384	584	645	258
2009 Omani, 226	504	591	439	559	550	461	636	205	460	366	590	719	446	537	584	645	147
2009 Omani, 227	504	643	439	615	320	344	688	410	460	366	690	772	446	642	584	645	205
2009 Omani, 228	504	643	439	559	320	461	636	410	511	366	741	719	446	384	584	757	90
2009 Omani, 229	504	643	439	445	320	287	636	311	460	480	741	719	446	537	584	645	147
2009 Omani, 230	504	643	491	559	166	575	584	205	408	366	690	719	562	384	584	757	90
2009 Omani, 231	504	643	439	559	320	461	636	410	511	366	741	666	446	282	584	757	315
2009 Omani, 232	504	643	491	502	320	632	636	463	460	366	690	612	446	333	584	757	147
2009 Omani, 233	504	694	439	559	320	461	688	360	511	366	690	772	388	537	584	757	315
2009 Omani, 234	504	591	439	559	320	461	688	410	511	480	794	772	446	642	584	757	315
2009 Omani, 235	504	643	439	559	320	461	688	410	511	366	794	719	446	591	584	757	315
2009 Omani, 236	185	643	330	559	320	461	636	410	511	366	847	719	446	485	584	704	372
2009 Omani, 237	504	643	439	559	320	461	688	410	511	480	794	719	446	642		757	315
2009 Omani, 238	504	643	491	502	398	120	688	463	460	366	741	772	388	384	584	704	540
2009 Omani, 239	504	591	439	502	166	404	636	410	511	308	690	666	446	384	584	757	205
2009 Omani, 240	452	643	491	502	320	575	688	311	511	308	690		446	384	584	645	429
2009 Omani, 241	504	643	491	502	550	575	636	258	511	308	690	719		384	584	810	429
2009 Omani, 242	504	643	439	445	320	461	636	205	511	480	741	719	330	537	584	645	258
2009 Omani, 243	504	591	439	559	320	404	688	463	408	308	690	719	446	180	584	645	258
2009 Omani, 244	504	643	439	502	398	518	636	410	460	366	537	719	446	537	584	645	258
2009 Omani, 245	504	643	439	559	320	230	636	410	460	366	690	666		537	584	439	205
2009 Omani, 254	504	643	491	502	550	404	584	569	511	366	690	666	330	384	584	757	429
2009 Omani, 255	504	643	439	559	320	461	584	410	511	366	794	719	446	231	584	757	315
2009 Omani, 256	504	591	330	559	320	120	688	463	408	308	690		446	537		645	147
2009 Omani, 257	504	591	330	502	320	461	636	258	408	308	690	719	446	537	584	592	147
2009 Omani, 258	504	643	439	559	320	461	636	410	408	366	690	719	678	384	584	592	147
2009 Omani, 259	504	540	384	502	475	575	636	463	511	366	690	719	446	384	584	592	429
2009 Omani, 260	504	643	491	502	475	575		463	511	366	690			384	584	810	372
2009 Omani, 261	504	643	491	502	550	404	688	463	565	308	690	719	446	384	584	704	429
2009 Omani, 262	504	643	439	559	320	461	688	410	511	366	741	772		384	584	757	315
2009 Omani, 263	504	643	439	559	320	461	636	410	511	366	741	719		642	584	757	315
2009 Omani, 264	504	643	491	502	166	575	584	516	511	308	690	666	504	384	584	810	258
2009 Omani, 265	504	643	491	502	320	404	688	205	460	366	690	772	446	591	584	704	315
2009 Omani, 266	504	643	439	559	320	230	688	463	460	366	741	772	504	591	584	645	205
2009 Omani, 267	452	643	439	559	320	461	688	463	511	308	690	719	388	537	584	592	258
2009 Omani, 268	452	540	439	445	320	230	688	463	565	366	690	719	446	537	584	592	258
2009 Omani, 269	504	643	439	559	245	461	688	205	511	366	640	719	388	485	584	704	258
2009 Omani, 270	504	643	491	502	550	404	688	410	565	308	741	719	446	384	584	704	258
2009 Omani, 271	504	643	491	392	475	575	636	463	300	366	690	719	446	231	584	645	205
2009 Omani, 272	504	643	491	502	550	518	584	152	511	308	690	719	446	384	584	810	258
2009 Omani, 273	452	591	439	445	320	404	636	675	408	308	690	612	446	537	584	645	258
2009 Omani, 274	504	643	491	502	550	575		258	511	366	690	612	388	384	584	757	205
2009 Omani, 275	504	643	439	559	320	461	688	205	511	480	741	772	446	642	584	704	315
2009 Omani, 276	504	643	491	502	550	575	584	463	511	308	690	719	330	384	584	810	258
2009 Omani, 280	504	643	439	559	166	461	636	410	408	366	690	719	388	642	584	757	258
2009 Omani, 281	504	643	491	502	550	575	740	311	623	308	690	719	446	384	584	757	205
2009 Omani, 282	504	643	491	502	550	575	688	205	511	308	690	719		384	584	757	90
2010 Non-Omani, 288	504	643	439	502	320		688	410	511	480	640	719	446	642	584	757	372
2010 Non-Omani, 291	504	643	439	559	398	461	636	410	565	366	741	719	446	485	584	645	147
2010 Non-Omani, 292	504	643	439	559	320		636	410	565	366	690	772	446	384	584	645	205
2010 Non-Omani, 293	504	643	491	502	550	404		463	460	366	537	719	388	384	584	704	653
2010 Non-Omani, 294	504	643	439	559	320	575	688	410	460	480	741	719	446	435	584	757	372
2010 Non-Omani, 295	504	643			320	461		410	460	308	741		446	435		757	205
2010 Non-Omani, 296	504	694	439	559	320	461	636	463	511	366	741	666	330	537		645	258
2010 Non-Omani, 299	504	643	491	502	781	575	688	463	460	366	690	719	388	384	584	704	653
2010 Non-Omani, 300	504		491	230	550	461	688	463	460	366	741	719	388	384	584	704	205
2010 Non-Omani, 301	504	643	439	559	320	461	688	410	408	366	690	772	446	642	584	645	205
2010 Non-Omani, 302	504	643	439	559	320	575	636	410	511	366	741	772	446	435	584	757	315
2010 Non-Omani, 303	504	643	439	559	320	461	688	410	511	366	741	772	446		584	757	315
2010 Non-Omani, 304	504	643	491	559	550	461	688	360	565	308	794	719	446	384	584	704
2010 Non-Omani, 305	504	643	439	559	320	632	636	410	565	366	640	612	446	537	584	645
2010 Non-Omani, 312	504	540	491	502	550	518	688	463	511	308	690	719	446	384	584	810	205
2010 Non-Omani, 319	504	643	439	559	320		688	410	460	480	640	719	446	435	584	757	205
2010 Omani, 283	504	643		559	320	461	636	410	353	366	847		388	333		645	258
2010 Omani, 284	504	591	439	559	550		636	410	460	366	640	719	330	537	584	645	147
2010 Omani, 285	504	643	491	502	550				511	308	690	719	446	384		810	205
2010 Omani, 286	504	643	491	502	475	461	688	463	511	366	741	719	562	384	584	592	205
2010 Omani, 287	504	694	439	559	320	575	740	410	511	480	900	825	446		584	810
2010 Omani, 289	504	643	439	559	320	461	636	410	565	366	640	719	330	537	507	645	205
2010 Omani, 290	504	643	439	502	320	461	636	360	460	366	690	612		435	584	645	205
2010 Omani, 297	504	591	439	559	320	743	636	463	408	308	640	510	446	537	584	645	205
2010 Omani, 298	504	643		346	550	404	636	410	460	366	537			435	584	645	205
2010 Omani, 306	504	643	439	559	320	461	636	410	460	480	640	612	446	435	584	645	258
2010 Omani, 307	504	643	439	559	320	461	688	410	511	366	741	772	446	435	584	757	315
2010 Omani, 308	504	540	491	502	475	575	688	516	511	308	640			384	507	704	429
2010 Omani, 309	504	643	439	559	398	461	636	410	511	480	690	719	446	537	584	704	147
2010 Omani, 310	504	643	491		320	461	636		511	366	690			435	584	757	205
2010 Omani, 311	504	643	439	502	550	461	584	463	511	366	690		388	384	584	757	600
2010 Omani, 313	504	540	491	502	475	461	688	258	511	366	741		330	333	584	592	429
2010 Omani, 314	504	643	439	559	320	461	688	410	565	366	794	772	446	693	584	757	315
2010 Omani, 315	504	643	439	559	245	461	636	360	511	366	640	772	388	282	584	704	258
2010 Omani, 316	504	643	491	502	475		584	463	511	366	741	666	388	333	584	810
2010 Omani, 317	504	643	439	559	320	461	688	410	460	366	741	772	446	642	584	757	372
2010 Omani, 318	504	643	439	559	320	575	636	410	408	366	537	719	446	537	430	645	258
2010 Omani, 320	504	643	439	559	320	575	636	463	408	366	640	719	446	435	584	645	205
2011 Non-Omani, 321	504	643	439		320		636	360	245		741	719		537	584	645	540
2011 Non-Omani, 322	504	643	544		475		688	463	353		640	719		384	584	757	490
2011 Non-Omani, 332	504	643	439		320		688	410	300		741	719		485	584	757	372
2011 Non-Omani, 334	504	643	439		245		740	410	353		741	719		642	584	757	540
2011 Non-Omani, 335	504	643	330		320		636	463	245		640	719		537	584	645	490
2011 Non-Omani, 336	452	643	439		320		688	410	300		741	666		642	584	757	540
2011 Non-Omani, 338	504	643	491		550		584	463	565		741	719		384	584	704	490
2011 Non-Omani, 339	504	643	439		320		740	410	353		741	719		642	584	757	540
2011 Non-Omani, 340	504	643	439		320		688	410	353		794	719		642	584	757	540
2011 Non-Omani, 341	504	643	439		320		636	463	245		640	719		485	584	592	540
2011 Non-Omani, 342	504	643	439		320		636	410	300		741	772		642	584	592	540
2011 Non-Omani, 343	504	643	439		320		636	360	138		640	719		537	584	645	540
2011 Non-Omani, 347	504	643	439		320		688	410	300		741	719		591	584	757	540
2011 Non-Omani, 348	504	643	439		320		688	410	245		640	666		485	584	645	540
2011 Non-Omani, 349	504	643	330		320		740	152	245		741	772		591	584	757	490
2011 Non-Omani, 350	504	643	491		550		584	463	300		640	666		384	584	645	490
2011 Non-Omani, 351	452	643	439		320		636	463	245		741	719		537	584	592	540
2011 Non-Omani, 352	560	643	491		550		688	463	408		741	666		384	584	810	490
2011 Non-Omani, 353	504	540	491		475		688	463	408		640	719		384	584	592	490
2011 Non-Omani, 354	504	643	439		320		688	410	300		794	825		642	584	757	540
2011 Non-Omani, 355	504	643	439		398			410	138		690	719		537		645	540
2011 Non-Omani, 356	504		439		320		688	410	300		741	772		642	584	757	540
2011 Non-Omani, 357	504	643	439		320		636	410	245		640			537	584	704	429
2011 Non-Omani, 358	504	643	330		320		688	410	300		741	772		282	584	757	540
2011 Non-Omani, 359	504	643	330		320		688	410	245		741	772		642	584	757	540
2011 Non-Omani, 360	452	643	491		550		584	410	84		690	719		384	584	704	490
2011 Non-Omani, 361	504	643	491		550		688	463	408		741			384	584	810	490
2011 Non-Omani, 362	504	643	439		320		636	410	245		640	719		333	584	645	540
2011 Non-Omani, 370	504	643	439		320		688	410	300		847	772		642	584	757
2011 Non-Omani, 376	504	643	491		550		688	516	408		640	719		384	584	757	490
2011 Omani, 323	504	643	330		320		688	410	408		640	719		537	584	757	205
2011 Omani, 324	504	643	439		320		688	410	300		590	719		642	584	757	429
2011 Omani, 325	504	643	439		320		636	410	245		741	719		537	584	645	540
2011 Omani, 326	504	643	491		550		636	463	408		640	666		384	584	810	429
2011 Omani, 327	504	643	491		320		584	463	353		690	719		384	584	757	490
2011 Omani, 328	504	643	439		320		636	410	300		741	772		642	584	757	540
2011 Omani, 329	504	643	439		320		688	410	353		640			485	584	757	372
2011 Omani, 330	504	643	439		320		688	410	300		741	772		642	584	757	540
2011 Omani, 331	504	643	384		550		636	463	408		741	719		384	584	704	490
2011 Omani, 333	504	591	439		550		636	152	138		741	719		537	584	645	540
2011 Omani, 337	504	643	491		398		584	463	300		640	719		384	584	757	490
2011 Omani, 344	504	643	439		166		688	410	300		640	772		537	584	704	540
2011 Omani, 345	504	643	439		320		688	410	353		690	719		537	584	757	540
2011 Omani, 346	504	643	439		320		636	410	138		640	719		792	584	757	540
2011 Omani, 363	504	643			320			410	245		640			537	584	757	540
2011 Omani, 364	504	643	491		550		688	463	408		690	719		384	584	704	490
2011 Omani, 365	504	643	330		320		636	410	300		640	666		642	584	645	540
2011 Omani, 366	504	643	439		320		688	410	300		794	772		537	584	645	540
2011 Omani, 367	504	643	491		550		636	463	245		590	719		231	584	704	490
2011 Omani, 368	504	643	330		320		688	410	300		741	772		642	584	757	372
2011 Omani, 369	504	643	439		320		636	463	245		741	666		537	584	645	490
2011 Omani, 371	504	643	491		550		688	463	408		794	719		384	584	757	490
2011 Omani, 372	504	643	491		550		688	516	300		741	719		435	584	757	490
2011 Omani, 373	504	643	491		398		688	463	408		690	719		384	584	757	490
2011 Omani, 374	504	643	491		550		688	516	245		640	719		384	584	810	490
2011 Omani, 375	504	643	330		320		636	311	245		794	719		537	584	645	540
2011 Omani, 377	504	643	491		320		584	463	408		690	719		384	584	810	490
2012 Non-Omani, 379	504	643	439	559	475	575	636	569	511	366	690	772	446	384	584	810	429
2012 Non-Omani, 380	504	643	491	502	550	575	688	516	460	366	690	666	446	384	584	704	315
2012 Non-Omani, 381	504			392	166	404		516	511	366			388	384			429
2012 Non-Omani, 385	504	643	439	392	166	575	584	463	511	366	690	719	388	384	584	704
2012 Non-Omani, 386	504	643	491	502	550	686	636	463	460	366	590	719	388	384	584	704	600
2012 Non-Omani, 387	504	643	330	392	320	461	636	410	565	480	847	772	504	81	584	704	315
2012 Non-Omani, 388	504			502	320	461		410	511	480			446	642			315
2012 Non-Omani, 389	504	643	439	392	320	461	636	410	623	366	741	719	446	537	584	810	258
2012 Non-Omani, 394	504	643	439	559	320	461	636	410	565	480	741	719	446	537	584	757	258
2012 Non-Omani, 395	504	591	491	392	320	461	636	410	511	480	690	719	446	537	584	645	258
2012 Non-Omani, 396	504	643	439	392	320	518	636	410	460	480	847	666	446	333	584	592	258
2012 Non-Omani, 397	504			502	550	404			565	308			446	384			490
2012 Non-Omani, 398	504			502	550	404		463	565	308			446	384			429
2012 Non-Omani, 399	504	643	439	392	320	461	740	410	511	480	741	719	446	642	584	645	372
2012 Non-Omani, 400	504	643	439	502	320	461	688	410	460	366	640	772	446	642	584	645	315
2012 Non-Omani, 401	504	694	491	445	320	461	688	410	511	366	900	719	446	485	584	810	372
2012 Non-Omani, 402	504	643	491		320	461	636	410	511	366	640	772	446	642	584	704	258
2012 Non-Omani, 403	504	643	439	559	166	461	636	410	460	366	690	719	446	537	584	704	315
2012 Non-Omani, 404	504	643	491	392	166	575	636	463	511	366	690	772	504	384	584	704
2012 Non-Omani, 405	504	643			166	575	636	463	511	366	741	719	504	384	584	757	429
2012 Non-Omani, 406	504	643	330	502	550	404	688	410	511	308	794	719	562	384	507	757	429
2012 Non-Omani, 431	452	643	330	502	320	461	636	463	565	308	847	719	388	384	584	757	205
2012 Non-Omani, 438	504	643	439		320	461	636	410	460	366	640	666	446	333	584	810	429
2012 Non-Omani, 439	504	643	439	502	550	575	636	463	511	366	690	719	446	384	584	810	767
2012 Non-Omani, 442	452	643	330	502	320	461	688	463	623	308	690	719	388	537	584	592	258
2012 Non-Omani, 453	504	643		559	320	404		410	511	366	794		446	231		757	258
2012 Non-Omani, 454	504	643	330	502	550	575	636	463	511	308	690	719	446	384	584	704	429
2012 Omani, 378	504	643	439	392	166	575		410	511	480	640	719	446	642	507
2012 Omani, 382	504	643	439	445	320	461	688	410	511	366	953	772	446	537	584	645	315
2012 Omani, 383	504	643	491	502	320	461	688	410	511	366	690	772	446	642	430	592	372
2012 Omani, 384	504	643	439	502	550	404	688	516	565	308	690	772	446	384	584	592	429
2012 Omani, 390	504	643	491	559	320	461	688	463	511	480	640	719	446	537	584	645	372
2012 Omani, 391	504	643	439	392	320	461	636	410	511	480	640	719	446	537	584	645	372
2012 Omani, 392	504	540	439	502	320	461		410	408	480	640	719	446	642	584	757	372
2012 Omani, 393	504	643	439	392	320	575	584	410	565	366	847	772	504	435	584	592	315
2012 Omani, 407	504	643	439	392	320	461		410	565	366	900		388	333	584	645	315
2012 Omani, 408	504	643	439	392	166	461		360		424	640	719	388	485	584	704
2012 Omani, 409	504	643	439	445	245	404	636	463	565	308	690	719	446	384	584	757	429
2012 Omani, 410	504	643	439	502	550	575	688	725	511	308	847	719	446	384	584	645	824
2012 Omani, 411	504			445	320	461		410	511	480			446	591			372
2012 Omani, 412	504	643	491	559	320	461		410	511	366	690	772	446	537	584	645	315
2012 Omani, 413	504	643	491	559	320	461	688	410	565	366	847	772	388	333	584	757	315
2012 Omani, 414	504	643	330	502	320	461		410	511	366	847	772	446	537	584	645	315
2012 Omani, 415	504	643	330	392	320	575	636	463	511	308	741	719	446	384	584	757	429
2012 Omani, 416	504			392	245	404		463	565	308	690		446	384		645	429
2012 Omani, 417	504	643	439	559	320	461	636	410	408	192	847	719	388	537	584		258
2012 Omani, 418	452	643	491	559	320	461	636	463	727	308	690	719	388	537	584	704	258
2012 Omani, 419	504	643	491	502	320	461	584	410	460	366	847	719	504	537	584	757	205
2012 Omani, 420	504	643	439	392	320	461	688	410	460	366	640		388	81	584	645	315
2012 Omani, 421	504	643	439	445	475	575	584	463	511	366	690	719	388	384	584	757	258
2012 Omani, 422	504	643	439	502	320	632	636	360	460	366	590	719	388	537	584	645	147
2012 Omani, 423	504	643	491	502	320	575	584	463	511	366	590	719	388	384	584	592	653
2012 Omani, 424	504	643	439	346	475	404	636	311	565	308	690	719	446	384	584	645	490
2012 Omani, 425	504			559	320	461		410	565	480			446	435			315
2012 Omani, 426	504			615	550	404		463	565	308			446	384			429
2012 Omani, 427	504	643	491	502	550	575	688	725	565	308	847	719	446	384	584	810	653
2012 Omani, 428	504	643	439	445	550	686	688	463	460	366	690	719	330	384	584	704	653
2012 Omani, 429	504	643	491	392	166	575	636	463	511	366	690	719	388	384	584	704	600
2012 Omani, 430	504	643	384	615	320	404	636	258	623	366	640	772	388	485	584	645	258
2012 Omani, 432	504	643	491	392	320	461	636	410	565	366	847	772	388	333	584	704	315
2012 Omani, 433	504	643	330	502	320	461	688	410	511	480	741	825	446	693	584	535	147
2012 Omani, 434	504	643	491	392	245	575	584	463	511	366	741	719	388	384	584	757
2012 Omani, 435	504	540	439	445	475	575		463	460	366	690	719	446	384	584	916	315
2012 Omani, 436	504	643	491	502	320	461	688	410	511	366	847	772	446	642	584	810	315
2012 Omani, 437	504	643	491	502	550	575	688	725	511	308	690	719	446	384	584	757	824
2012 Omani, 440	504	643	491	392	166	461	688	410	511	480	590	719	446	642	584	810	372
2012 Omani, 441	504	643	439	445	550	404	688	463	511	308	690	719	446	384	584	645	429
2012 Omani, 443	504		330	392	166	404	636		565	308		719	446	384	584		429
2012 Omani, 444	452	643	491	559	320	120	636		565	308	690	719	388	537	584	757	205
2012 Omani, 445	504	643	439	559	320	461	636	410	511	366	690	772	446	642	584	704	315
2012 Omani, 446	504	643	439	502	320	461	688	410	565	366	900	772	388	333	584	810	258
2012 Omani, 447	504	643	491	392	320	461		410	408	480	640	719	388	537	584	704	258
2012 Omani, 448	504	643	491	445	550	404	688	463	565	308	690	719	446	384	584	757	429
2012 Omani, 449	504	643	491	502	320	461	688	410	511	366	847	772	446	333	430	810	315
2012 Omani, 450	504	643	491	502	550	404	688	463	565	308	690	719	388	231	584	704	372
2012 Omani, 451	504	643		392	320	461		463	623	366	741	560	562	591		704	205
2012 Omani, 452	504	643	491	559	245	461		360	511	366	640	772	388	485	584	810	258
2012 Omani, 455	504	643	439	559	320	461	636	410	623	366	690	612	446	537	584	592	315
2012 Omani, 456	504	643	544	392	166		636		511	308	690	719	446	384	584	645	429
2012 Omani, 457	504	643	491	392	166		636		511	308	690	719	446	384	584	645	429
2013 Non-Omani, 458	504	643	439	502	320	461	636	463	511	480	794	666	446	537	584	810	258
2013 Non-Omani, 462	504	643	330	559	320	461	636	463	511	480	741	719	446	537	584	592	258
2013 Non-Omani, 463	504	643	491	502	550	575	636	463	194	308	690	719	446	384	584	704	258
2013 Non-Omani, 465	504	643	330	392	320	461	636	152	511	480		666	446	537	584	704	258
2013 Non-Omani, 466	504	643	491	502	550	575	688	410	460	366	690	666	504	384		757	315
2013 Non-Omani, 467	504	643	330	559	320	461	636	410	511	134	741	772	446	642	584	810	372
2013 Non-Omani, 468	504	643	439	445	320	461	530	410	511	366	537	772	446	537	584	704	315
2013 Non-Omani, 469	504	643	439	445	320	461	688	463	511	366	794	772	446	537	584	757	429
2013 Non-Omani, 470	504	643	330	559	320	461	688	463	511	366	741	772	446	642	584	757	315
2013 Non-Omani, 471	504	540	491	445	475	575	688	410	460	366	690	719	446	384	584	757	372
2013 Non-Omani, 480	504	643	439	502	320	461	636	516	623	366	690	719	446	537	584	645	147
2013 Non-Omani, 482	504	643	439	502	320	461	636	463	408	366	590	772	388	435	584	645	258
2013 Non-Omani, 483	504	540	491	502	475	686	688	463	460	366	690	719	446	384	584	757	372
2013 Non-Omani, 484	504	643	330	392	320	461	688	152	511	308	690	719	446	537	584	592	258
2013 Non-Omani, 485	504	643	330	502	320	461	636	410	408	366	590	719	446	537	584	645	258
2013 Non-Omani, 486	400	643	491	502	550	575	636	463	460	308	690	666	446	384	584	757	429
2013 Non-Omani, 487	504	643	491	502	550	120	636	569		366	690		388	384	584	704	315
2013 Non-Omani, 488	238	643	439	445	320	461	636	410	460	250	537	666	446	333	430	810	315
2013 Non-Omani, 489	504		491	502	550	404	740	463	353	308	690	719	446	384	584	704	90
2013 Non-Omani, 490	504	540	491	502	475	575	688	463	511	366	640	772	562	384	584	592	429
2013 Non-Omani, 491	504	643	330	559	320	461	688	410	511	366	741	772	446	693	584	757	315
2013 Non-Omani, 492	504	643	384	502	320	120	688	152	511	366	690	772	446	384	584	810	429
2013 Non-Omani, 493	452	643	491	502	550	575	688	463	460	366	741	666	504	384	584	704	315
2013 Non-Omani, 494	504	643	330	392	320	461	584	463	460	134	640		446	537		704	372
2013 Non-Omani, 495	504	643	330	559	320	461	688	205	511	308	794		446	642	584	757	315
2013 Non-Omani, 496	504	643	439	502	320	461	688	152	460	366	900	772	446	591	584	704	315
2013 Non-Omani, 497	504	643	330	559	320	461	688	463	565	366	794	772	388	537	584	704	315
2013 Non-Omani, 498	504	643	439	445	166	575	688	569	511	366	640	719	446	537	584	757	90
2013 Non-Omani, 499	504	643	439	445	320	461	688	152	565	366	741	772	330	642	584	757	315
2013 Non-Omani, 500	504	643	491	502	550	404	636	311	565	308	690	719	446	384	584	810	258
2013 Non-Omani, 501	504	643	491	502	550	575	688	463	408	366	690		446	384	584	704	315
2013 Non-Omani, 502	504	591	330	559	320	404	636	463	408	308	690	612	388	537	584	645	258
2013 Non-Omani, 525	504	643	439	559	320	461	636	410	408	366	590	772	446	537	584	645	258
2013 Non-Omani, 526	504	643	439	559	320	287	636	410	565	250	741	719	446	537	584	645	258
2013 Non-Omani, 527	504	643	439	559	320	461	636	463	511	366	690	666	446	537	584	810	258
2013 Non-Omani, 528	504	643	439	559	320	461	636	675	353	134	741	612	446	333		535	258
2013 Non-Omani, 529	504	643	439	559	320	461	688	152	460	366	741	772	446	485	584	757	315
2013 Non-Omani, 530	504	591	491	502	550	120	584	463	511	192	690	719	504	384	584	704	90
2013 Non-Omani, 536	504	643	491	502	550	287	688	410	353	308	690	719	446	384	584	592	147
2013 Non-Omani, 541	504	643	330	559	320	404	688	516	511	424	794		446	642	584	592	315
2013 Non-Omani, 542	504	643	330	559	320	461	688	410	460	366	794	772	446	642	584	757	90
2013 Omani, 459	504	540	491	502	475	575	688	463	511	192	690	719	562	384	584	592	429
2013 Omani, 460	504	643	330	559	320	461	636	410	460	192	690	719	446	537	584	704	258
2013 Omani, 461	504	643	439	392	320	461	636	463	460	366	640	719	388	537	584	704	258
2013 Omani, 464	504	643	491	502	550	575	584	410	511	366	794	719	504	384	584	704	258
2013 Omani, 472	504	643	330	445	320	461	636	569	511	480	794	772	446	384	584	704	315
2013 Omani, 473	504	643	439	559	320	461	688	410	511	480	640	719	446	537	584	704	372
2013 Omani, 474	504	643	439	559	320	461	688	463	460	366	640	719	388	591		757	258
2013 Omani, 475	504	643	491	559	320	461	584	463	460	366	794	719	388	537	584	704	429
2013 Omani, 476	504	643	491	559	550	575	688	410	511	308	690		446	384	584	592	205
2013 Omani, 477	452	643	330	392	320	461	636	463	565	308	690	719	388	537	584	810	258
2013 Omani, 478	504	643	439	559	320	461	688	410		366	794	772	446	537	584	757	147
2013 Omani, 479	504	591	330	502	320	461	636	410	565	366	537	666	446	537	584	645	205
2013 Omani, 481	504	643		502	320	461		463	511	366	794			384		645	315
2013 Omani, 503	504	643	439	559	320	287	688	410	511	366	794	772	446	642	584	757	372
2013 Omani, 504	504		439	559	320	461	688	463	511	366	741		446	282	584	757	315
2013 Omani, 505	504	643	491	392	398	575	688	463	511	366	690		562	384	507	810	429
2013 Omani, 506	504	591	439	559	320	404	636	152	408	308	640	719	388	537	584	645	205
2013 Omani, 507	504	643		502	550	575	584	463	511	366	690	612	446	384	584	757	90
2013 Omani, 508	504	643	491	502	475	404	584	410	511	366	690	666	388	384	584	810	90
2013 Omani, 509	504	643	544	502	475	575	584	410	511	366	690	719	388	384	507	757	490
2013 Omani, 510	504	643	544	502	475	575	584	152	511	366	690	719	388	384		757	90
2013 Omani, 511	504	540	491	445	475	575	688	152	511	366	690	719	562	384	584	645	429
2013 Omani, 512	504	643	491	502	475	632	584	516	511	366	690	719	388	384	584	810	90
2013 Omani, 513	504	643	491	502	398	575	636	410	460	366	690	719	446	384	584	704	429
2013 Omani, 514	504	643	439	502	475	575	688	675	511	308	690	719	388	384	584	757	147
2013 Omani, 515	504	643	439	559	320	461	740	410	511	480	640	719	388	537	584	645	372
2013 Omani, 516	504	643	439	230	320	461	688	569	511	250	794	666	446	642	584	645	315
2013 Omani, 517	504	643	439	559	320	461	688	463	511	366	794	772	446	537	507	757	315
2013 Omani, 518	504	643	439	559	320	461	636	463	460	366	794	772	446	642	584	704	315
2013 Omani, 519	452	643	491	502	860	686	688	410	460	366	690	719	388	384	584	704	90
2013 Omani, 520	504	643	491	502	320	461	688	463	511	366	690	719	446	384	584	645	315
2013 Omani, 521	504		491	502	630	404		410	511	366	690	719	562	384	584	810	429
2013 Omani, 522	504	643	439	392	320	461	636	463	511	366	794	719	446	537	584	704	147
2013 Omani, 523	504	643	439	502	320	461	636	463	408	308	690	666	388	537	584	645	147
2013 Omani, 524	504	643	439	559	320	461	636	463	460	366	640	612	504	537	584	592	205
2013 Omani, 531	504	643	330	559	320	461	688	410	511	366	741	772	446	642	584	757	315
2013 Omani, 532	504	643	491	346	475	404	584	410	511	366	690	666	388	384	584	810	258
2013 Omani, 533	504	643	439	559	320	461	688	463	511	366	690	772	446	642	584	757	315
2013 Omani, 534	504	643	491	502	550	575	688	463	511	308	690	719	446	384	584	704	90
2013 Omani, 535	504	591	330	559	550	404	636	410	408	308	690	612	388	537	584	645	205
2013 Omani, 537	504	643	330	559	320	461	636	152	408	366	640	719	446	485	507	645	258
2013 Omani, 538	504	643	330	559	320	461	688	463	511	366	794	772	446	642	584	757	315
2013 Omani, 539	504	643	491	502	475	575	584	675	511	366	690	719	388	384	584	645	315
2013 Omani, 540	504	643	491	502	550	404	688	410	565	308	690	719	446	384	584	704	429
2013 Omani, 543	504	643	330	559	320	461	636	410	511	366	640	719	388	537	507	645	147
2014 Non-Omani, 544	504	643	439	559	320	461	636	410	565	480	690	878	446	537	430	645	90
2014 Non-Omani, 546	504	643	439	559	320	461	810	410	511	366	741	878	388	642	430	757	205
2014 Non-Omani, 547	504		491	445	550	575	636	360	460	366	590	825	330	537	430	645
2014 Non-Omani, 549	504	643	491	502	320	404		463	565	308	690		446	384		704	429
2014 Non-Omani, 552	504	643	439	559	320	461		410	565	366	794	772	446	642	430	757	315
2014 Non-Omani, 553	504	643	439	559	320	404		410	511	480	690	719	446	537	283	592	315
2014 Non-Omani, 556	504	643	439	502	320	404	688	463	460	366	690	719		693	584	704	258
2014 Non-Omani, 557		643	544	559	320	461		410	511	134	690	719		537	584	757	429
2014 Non-Omani, 560	504	643	491		550	404	688	516	565	308	690	719	446	642	584	704	429
2014 Non-Omani, 562	504	643	491	559	630	518	688	410	460	366	640	719		740		645	315
2014 Non-Omani, 563	504	643	439	559	320	461	740	410	511	366	640	666	388	642	584	757	315
2014 Non-Omani, 564	504	540	491	502	398	518	688	569	460	366	690		446	537		757	372
2014 Non-Omani, 565	504	540	491	502	398	518	688	569	460	366	690	719	446	591	507		372
2014 Non-Omani, 566	504	643	491	502	550	632	688	463	460	366	690	666	330	384	507		258
2014 Non-Omani, 567	560	643	439	559	398	461	636	410	511	366	690	719	388	537	661		147
2014 Non-Omani, 568	452	643	439	502	320	461	636	463	565	308	640	719	330	537	738	645	258
2014 Omani, 545	504	591	491	502	320	518		463	511	366	690	825	446	384			540
2014 Omani, 548	504	643	491	502	320	518	584	463	511	366	690	825	446	384	283		600
2014 Omani, 550	504	643	439	559	398	461	740	410	511	366	741	878	388	693	430	757	315
2014 Omani, 551	504	643		559	550	461	688	410	460	366	690	931	388	537	430	704	315
2014 Omani, 554	504	643	439	559	550	461		463	677	308	794	772	330	485	430	592	90
2014 Omani, 555	504	643	439	559	320	461	636	463	408	366	640	719	330	537			90
2014 Omani, 558	504		439	559	320	461	688		353	134				384	507	757	258
2014 Omani, 559		643	384	502	320	120		463	460	134	690	612		642	661		315
2014 Omani, 561	504	643	491	559	320	461	688	410	511	366	794	772	388	384	507		315
2014 Omani, 569		643	330	502	475	461	584	463	511	366	690	719	330	642	430	757	824
2015 Non-Omani, 573	504	643	439	559	630	461	636	410	460	480	690	772	388	537	661	645	90
2015 Non-Omani, 574	504	643	491	445	320	518	584	360	511	366	590	772	330	384	584	645	490
2015 Non-Omani, 579	504	643	491	502	550	518		463	565	308	690	719	446	537	661	704	429
2015 Non-Omani, 581	504		439	559	320	461	636	410	565	480	690	825	388	384		645	90
2015 Non-Omani, 582	504	643	439	559	320	404	636	410	565	480	590	719	446	333	584	757	429
2015 Non-Omani, 583	504		491	502	550	632	688	463		366			330	333	507	704	653
2015 Non-Omani, 586	504		439	559	320	461	688	410	511	480	640	772	388	642	738	592	315
2015 Non-Omani, 587	504	643	491	502	475	518	636	516	511	308	690	719	446	537	584		372
2015 Non-Omani, 588	504	643	491	502	550	404		463	565	308	690	719	504	384			429
2015 Non-Omani, 589	504			559	320	461	688	410	511	480	640	719	678	642	584	810	429
2015 Non-Omani, 592	504	643	224		320	461		410	511	366	640	719	388	384			372
2015 Non-Omani, 594	504	643	439	502	550	518		463	565	366	794	719	388	333			429
2015 Non-Omani, 595	504	643	439	559	320	404	636	463	408	308			330	384	661		258
2015 Non-Omani, 598	504	643	439	502	320	404	636	463	408	308	690	719	330	384	661	645	258
2015 Omani, 570	504	643	491	502	320	518	740	258	511	308	794	825	446	384	584		890
2015 Omani, 571	504	643	439	445	550	461	636	306	511	480	741	825	446	537			90
2015 Omani, 572	504	643	439	559	320	461	688	410	511	366	794	825	388	537	584	757	315
2015 Omani, 575	504			559	320	461	688	410	460	366	794	878	330	591	661		429
2015 Omani, 576	504	643	439	559	320	461	636	410	460	480	741	719	388	333		645	710
2015 Omani, 577	504	643	491	502	550	518	688	258	511	308	741	825	446	384	430		767
2015 Omani, 578	560	643	439	615	320	461	688	410	511	366	741	772	388	792	360	757	372
2015 Omani, 580	504	643	491	502	550	518	688	410	511	308	690	719	446	537	584	757	372
2015 Omani, 584	504	643	439	559	320	461		410	460	366	794	772	330	384			372
2015 Omani, 585	504	643	439	559	320	461	688	410	511	480	640	719	388	384	584	757	372
2015 Omani, 590	504	694	439	559	320	461	688	410	511	366	640	719	388	642	430	704	258
2015 Omani, 591	504		491	502	398	518	688	410	511	308	690	719	446	740		810	710
2015 Omani, 593	452	643	439	559	320	461	636	463	623	308	690	719	330	384	430	592	90
2015 Omani, 596	504	591	439	502	320	461	636	463	408	308	690	772	330	537	430	645	90
2015 Omani, 597	504	643	491	502	550	518	636	463	511	308	690	719	446	792	815		429
2016 Non-Omani, 602	504	643	491	502	475	518		463	511	308	690	772	446	384	584	810	767
2016 Non-Omani, 603	504	643	439	502	320	461	688	410	511	366	741	878	388	642	430	757	90
2016 Non-Omani, 605	504	643	491	502	320	518	688	463	511	308	690	772	446	384	430	757	429
2016 Non-Omani, 608	504	643	439	559	320	461	688	410	511	366	794	825	388	642		757	315
2016 Non-Omani, 610	452	643	491	502	320	404		463	565	308	741	772	446	384	360		429
2016 Non-Omani, 611	504	643	439	559	320	461	740	410	511	366	847	825	388		507	757	315
2016 Non-Omani, 612	504	643	439	559	398	461	636	410	460	366	690	666	446	537			90
2016 Non-Omani, 613	504	643	439	559	320	461	636	410	511	480	794	772	446	384	584	704	315
2016 Non-Omani, 614	504	591	491	502	550	404	688	463		308	690	719	446	591	584	704
2016 Non-Omani, 615	504	643	491	502	550	404	740	463	565	308	690	719	446	537	584		429
2016 Non-Omani, 616	504	643		502	550	632	688	463	460	366	690	719	330	485	584	704	653
2016 Non-Omani, 619	504	643	491	502	550	632	688	463	460	366	690	719	330	384	584	704	653
2016 Non-Omani, 621	504		439	559	320	461	688	410	511	366	741	772	330	333		757	372
2016 Non-Omani, 622	504	643	439	559	398	461	636	410	511	366	690	719	388	333	584	645	147
2016 Non-Omani, 627	504		491	502	550	575	688	463	460	366	690	719	330	384	584	704
2016 Non-Omani, 628	504	643	491	502	550	518	584	463	511	366	690	719	446	333		757	490
2016 Non-Omani, 630	504	643	439	559	320	461	688	410	511	480	640	719	388	435	584	704	372
2016 Non-Omani, 631	504	643	439	559	320	461	688	410	511	480	640	719	388	642	584	757	372
2016 Non-Omani, 633	504	540	439	502	320	461	636	410	511	480	690			384		645	372
2016 Non-Omani, 636	504	643	439	559	320	461		410	511		741	772	388	537			315
2016 Non-Omani, 638	504	643	439	559	320	461	688	410	511	480	640	719	388	384		592	315
2016 Non-Omani, 641	504	591	439	559	320	461	636	463	408	366	640	666	620	384		645	767
2016 Non-Omani, 644	348	643	439	559	320	461	636	410	511	366	640	719		384	738	645	258
2016 Non-Omani, 646	452		439	559	320	461		516	623	308	690	719	330	384	430		90
2016 Non-Omani, 647	504	643	439	559	320	461	688	410	565	366	900	719		384	430	704	258
2016 Omani, 599	504	643	439	559	320	461	688	410	511	366	741		388	693	584	757	315
2016 Omani, 600	504	643		502	320	518	740	410	511	308	690	825	446	384	430	757	767
2016 Omani, 601	504	643	439	559	320	461		410	511	366	741		388	537			315
2016 Omani, 604	504	643	439	445	320	461	636	258	511	480	741		388		430	645	90
2016 Omani, 606	504	643	491	502	398	404		463	565	308	690	772	272	384	584	704	372
2016 Omani, 607	504	643	439	559	630	461	688	410	511	480	640		388	642	507	757	372
2016 Omani, 609	504	643	439	559	320	461		410	511	366		825	388	435		757	315
2016 Omani, 617	504	643	439	559	320	461	688	410	511	366	794	772	388	384	584	757	315
2016 Omani, 618	504	643	439	615	320	461	688	410	511	366	741	772	272	384	584	757	372
2016 Omani, 620	504	643		559	320	461	688	410	511	480	640	719	388	537	507	757	372
2016 Omani, 623	504	643	439	559	320	461	636	360	511	366	640	719	388	384	584	645	90
2016 Omani, 624	504	643	491	502	550	518	688	463	565	308	690	719	446	485	584	757	490
2016 Omani, 625	504	643	491	502	550	404		463	565	308	690	719	446	642			429
2016 Omani, 626			439	559	320	461	688	463	623	480			388	537	815	757	372
2016 Omani, 629	504	643	384	559	320	461	636	410	460	480	741	612	388	384	584	704	315
2016 Omani, 632	504	591	491	502	550	518	688	205	511	308	690		330	537	584	757	710
2016 Omani, 634	452	643	491	502	320	632	688	463	460	366	690	719	330	384	584		600
2016 Omani, 635	504	643	491	502	550	632	688	516	460	366	690		330	384		704	653
2016 Omani, 637	452	643	491	502	245	632		463	460	366	690	719	214	537	661	704	600
2016 Omani, 639	504	643	491	502	550	461	688	258	511	308	690	719	446	537	584	810	710
2016 Omani, 640	504	643	491	502	320	461		410	511	366	741		388	384			90
2016 Omani, 642	504	643	491	502	475	518		463	511	366	640	719	330	537	815		429
2016 Omani, 643	504	591	439	502	320	461	636	463	408	308	690	772	330	384		645	90
2016 Omani, 645	504	643	491	502	475	518		463	511	366	640	719	330	642			429
2016 Omani, 648	504	643	439	559	320	461	688	410		480	640		388	384	892	757	372
2017 Non-Omani, 651	504	643	439		320	461		410	511	366	847	825	446	537	584		315
2017 Non-Omani, 653	504	643	439	559	320	461	636	410	460	480	741	825	388	537	430	645	90
2017 Non-Omani, 654	504	643	439	559	550	404		410	565	366	741	825			584		372
2017 Non-Omani, 657	504	643	439	559	320	461		410	460	480	640	719	388	537	661	757	372
2017 Non-Omani, 660	504	643	439	559	320	461	688	410	460	366	794		388			757	315
2017 Non-Omani, 661	504	643	439	559	475	461	636		511	134	741	666	388	333	584	645	205
2017 Non-Omani, 662	504	643	491	502	550	518	636	463	511	308	690	772	446	384		757	429
2017 Non-Omani, 664	504	643	491	502	320	404		463	565	308	690	772	446	384	584		429
2017 Non-Omani, 665	504	643	491	502	320	632	688	463	460	366	690	825	330	384	584	704	653
2017 Non-Omani, 670	504	643	491	502	320	518	688		408	134	690	772		384	815	757	429
2017 Non-Omani, 671	504	643	439	559	550	461		410	460	366	794	825	330	591	584	757	653
2017 Non-Omani, 674	504	643	439	559	320	461	688	410	511	366	847	931	388	642			315
2017 Non-Omani, 676	504	643	439	559	550	461		410	511	366	690	772	388	642	584	757	315
2017 Non-Omani, 679	504	643	439	559	320	461	688	410	511	480	640	825	388	537	584	757	372
2017 Non-Omani, 682	504	643	439	615	320	461		410	511	366	590	719	388	537	430	757	205
2017 Non-Omani, 683	504	643	491	502	320	404	740	463	565	308	741	772	446	384		704	315
2017 Non-Omani, 686	504	643	439	559	550	404	636	258	565	366	690	719	446	384	360	704	258
2017 Non-Omani, 687	504	643	439	559	320	461		410	511	366	900	772	388	384		757	315
2017 Non-Omani, 688	504	643	491		320	461	688	410	511	480	640	719	388	537	584	704	372
2017 Non-Omani, 689		591	491	502	320	461	688	463	511	134	690	772	330	384	584		258
2017 Non-Omani, 693	504	643	439		320	461	688	410	565	366	847	772	330	384	507	757	90
2017 Non-Omani, 695	504	643	439	559	320	461	688	410	565	366	690	772	330	642			258
2017 Omani, 649	504	643	330	559	550	632	688	410	460	134	690	878	330	333	584	704	600
2017 Omani, 650	504	643	439	559	320	461		410	511	366	794	825	446			704	90
2017 Omani, 652	452	591	491	502		632		463	460	366	690	772	330	384		704	600
2017 Omani, 655	504	643	439	559	320	461	688	410	511	366	847		446	537	584	757	315
2017 Omani, 656	504	643	491	502	320	518	688	258	565	308	794		446	435	815	757	824
2017 Omani, 658	504	643	439	559	320	461	740	410	511	366	741	825	388		661		315
2017 Omani, 659	504	643	439	559	320	461		410	511	366	847	825	388	537	584		372
2017 Omani, 663	504	540	491	502	320	518		463	511	366	640	772	446	384			429
2017 Omani, 666	504	643	439	559	550	461	688	410	511	366	690	825	388	740	584	757	315
2017 Omani, 667	504	643	439	559	550	461	636	410	565	366	640	772	388	537	430	645	90
2017 Omani, 668	504		491	502	320	518	688	258		308	690		446	384	430		372
2017 Omani, 669	504	643	491	502	320	404	810	463	565	308	690	772	504	384	360	704	429
2017 Omani, 672	504	643	439	559	550	461		463	511	366	794	825	330	537		757	315
2017 Omani, 673	504	643	439	559	550	461	688	410	408	480	640	772	388	642	507		372
2017 Omani, 675	504	643	439	559	398	461	688	410	511	366	794	825	388	642	430	757	315
2017 Omani, 677	504	643	491	502	166	518		306	511	308	690	772	446	384	661	757	600
2017 Omani, 678	504	643	439	559	320	461	688	410	511	480	640	825	388	642	507		315
2017 Omani, 680	504	591		502	550	518	636	205	511	308	690		446	384	815	757	90
2017 Omani, 681	504	643	439	559	320	461	636	463	460	480	794	612	388	333	430	645	258
2017 Omani, 684	504	643	439	559	320	461		410	511	480	640	719	388	693	430	757	372
2017 Omani, 685	504	643	491	502	320	518	688	258	511	366	690	772	446	384	892	757	653
2017 Omani, 690	504		439	502	475	518		463	511	366	690	719	330	642	430		824
2017 Omani, 691		643	544	502	245	461	688		511	134	640	719		537		645	372
2017 Omani, 692	504	643	439	502	320	461		410	565	366	640	719	446	642			90
2017 Omani, 694	504	643	439	559	245	461		360	511	366	640	772	330	384			90
2018 Non-Omani, 697	504	643	439	559	550	461		410	511	480	640		388	642	430	916	372
2018 Non-Omani, 699	504	643	439	559	320	461		410	460	480	741	612	388	333	584		90
2018 Non-Omani, 700	504	643		559	320	461	688	410	511	366	794	878	214	537			315
2018 Non-Omani, 704	504	643	384	559	550	461		410	511	480	741	719	388	333	584		90
2018 Non-Omani, 705	504	643	439	559	320	461	688	410	511	424	640	772	388	642	584	645	315
2018 Non-Omani, 706	504	643	439	559	320	461	688	410	511	366	794	878	388	333	507	757	147
2018 Non-Omani, 708	504	643	439	559	320	461		410	565	480	794		446	591	430		315
2018 Non-Omani, 710	504	643	491	502	320	632		463	460	366	690	825	330	384	507		490
2018 Non-Omani, 711	504	643	439	559	630	461	636	410	565	366	640	878	388			645	147
2018 Non-Omani, 712	504	643	439	559	630	461	636	410	460	480	741	719	388	333	430	645	90
2018 Non-Omani, 713	504	643	439	559	320	461		410	511	480	847	878	446	642	661	704	315
2018 Non-Omani, 714	504	643	439	559	320	461	636	410	511	366	690	772	388	537	584		767
2018 Non-Omani, 716	504		491	502	550	404	688	463	565	308	741	825	446	384	584	704
2018 Non-Omani, 718	504	643	491	502	320	404	688	463	565	308	690	772	446	384			600
2018 Non-Omani, 719	504	643	439	559	320	461	636	410	511	366	741	772	388	537	430	704	147
2018 Non-Omani, 721	504	643	439	559	320	461		410	511	480	640	719	388	384			315
2018 Non-Omani, 722	452		439	559	320	461	688	410	408	366			388	642	507	757	315
2018 Non-Omani, 723	504		491	502	475	518	688	410	511	366	690	719	446	384	430	645
2018 Non-Omani, 728	504	540		502	398	461	688	410	511	366	640	719	446	384	507		429
2018 Non-Omani, 729	504	643	439	502	320	404	636	463		308	690	666		537	50	645
2018 Non-Omani, 730	504	643	491	502	550	632	688	463	460	366	690	719	330	591	584		653
2018 Non-Omani, 731	504	643	439	559	320	461	688	410	511	366	690	825	330	384	430	757	315
2018 Non-Omani, 732	504	643	491	502	550	518	584	463	511	366	794	719	562	435	430		490
2018 Non-Omani, 733	452	591	439		320	461	636	410	565	366	741	719	504	384	507	704	90
2018 Non-Omani, 734	504	643	491	502	320	461	688		511	366	690	719	330	642	892		258
2018 Non-Omani, 735	504	643	439	559	320	461	636	410	460	366	640	719	330	384	661		258
2018 Omani, 696	504	643	439	559	320	461		410	565	480	690	825	446	537	661		258
2018 Omani, 698	504		491	502	320	404	688	516	565	308	690		446	384		704	429
2018 Omani, 701	504	643	439	559	320	461	740	410	511	366	690	772	388	740	661		315
2018 Omani, 702	504	643	439	559	320	404	636	410	511	366	590	772	388	537	584	645	372
2018 Omani, 703	504		439	559	320	461	636	463	408	366	640	878	330	537		645	490
2018 Omani, 707	504		439	559	320	461		410	460	366	794	825	446	591	584	757	315
2018 Omani, 709	504		439	559	320	461	636	410	511	480	794	825	446	537		645
2018 Omani, 715	504	540	491	502	320	518		463	565	366	690	772	504	384		592	429
2018 Omani, 717	504	643	491	502	320	404		463	511	308	690	825	388	384	584	757	429
2018 Omani, 720	504	643	491	502	550	461	636	258	511	308	690	719	446	384	507		710
2018 Omani, 724	504	591	439	502	320	461	636	463	408	308	690	772	330	384		645	90
2018 Omani, 725	452	643	439	559	320	461		463	565	308	690	666	330	642			90
2018 Omani, 726	504	643	491	502	475	518	584	463	511	366	640	719	330	384		810	429
2018 Omani, 727	504	643	491	502	550	518	636	463	511	308	690	719	446	384	815	810	429

## Sheet: Cod_Data
Year	Sample ID	MIRU2	MIRU27	MIRU24	MTUB29	MIRU4	ETRB	MIRU39	MIRU23	MIRU40	MTUB30	MIRU10	MIRU16	MTUB39	MIRU26	MIRU20	MIRU31	MTUB21
2008	1	7	4	5	5	5	10	3	6	8	5	2	5	7	9	6	4	2
2008	2	7	3	4	5	5	7	3	8	8	4	2	5	5	9	6	4	2
2008	3	7	4	4	7	6	11	3	7	7	7	2	5	5	9	6	4	1
2008	4	7	4	4	7	3	7	3	2	8	3	5	4	4	5	6	4	4
2008	5	7	4	5	4	6	9	2	8	8	5	4	5	4	6	6	5	5
2008	6	7	4	3	5	6	7	3	8	9	6	5	4	7	5	6	4	5
2008	7	7	4	2	6	1	6	3	7	9	5	2	5	0	6	6	4	3
2008	8	7	4	4	6	3	7	4	7	9	5	7	6	4	7	6	6	5
2008	9	7	4	5	6	5	9	2	8	9	5	4	0	3	6	6	4	4
2008	10	7	4	4	6	4	7	4	7	9	6	0	7	5	7	6	2	1
2008	11	7	4	4	6	3	7	4	7	8	6	6	6	5	7	6	6	5
2008	12	7	4	4	7	5	7	4	7	8	6	3	5	3	6	6	6	4
2008	13	6	4	4	5	3	6	2	6	12	5	4	5	4	9	4	0	4
2008	14	7	4	4	5	3	7	3	7	7	8	3	5	7	8	6	4	4
2008	15	6	5	4	7	3	7	3	5	11	4	4	5	7	9	6	2	4
2008	16	7	4	2	4	3	7	4	7	6	6	7	6	0	9	6	6	5
2008	17	7	0	4	5	3	7	3	5	9	6	5	0	0	9	5	4	3
2008	18	7	4	4	5	3	7	4	7	9	4	5	6	4	7	6	6	2
2008	19	7	4	5	6	6	9	3	8	8	7	4	5	5	6	6	0	7
2008	20	7	4	4	4	3	7	3	8	9	5	4	5	5	9	6	4	2
2008	21	0	4	5	6	1	9	2	6	9	5	4	5	0	6	6	6	5
2008	22	7	4	4	5	1	9	0	8	6	2	3	5	4	9	6	0	1
2008	23	7	4	5	6	3	10	2	8	9	7	6	4	6	6	6	6	4
2008	24	7	4	4	7	3	7	4	7	8	6	6	6	5	11	6	6	6
2008	25	7	4	4	7	6	7	4	7	9	6	5	6	5	11	6	0	14
2008	26	7	3	4	5	3	7	3	3	10	6	1	4	5	9	6	4	3
2008	27	7	4	5	6	6	9	4	9	8	5	4	5	5	6	6	6	5
2008	28	7	4	5	4	3	7	4	7	8	5	0	6	3	10	6	4	1
2008	29	7	4	4	4	6	7	4	7	9	6	8	6	5	11	6	6	3
2008	30	7	4	5	6	6	9	4	8	8	5	4	5	5	6	4	7	3
2008	31	7	4	5	6	5	11	3	10	8	5	4	5	4	6	6	5	11
2008	32	7	2	5	6	3	7	4	8	9	5	4	6	5	6	4	3	7
2008	33	6	4	4	5	3	7	3	8	8	6	4	5	6	9	6	2	4
2008	34	7	4	4	7	3	7	4	7	9	6	2	6	5	9	6	6	5
2008	35	7	4	5	6	6	2	4	8	10	6	4	0	7	6	6	4	7
2008	36	7	4	4	7	3	7	4	7	9	6	6	5	5	9	6	6	3
2008	37	7	4	4	5	3	7	3	7	7	7	3	4	5	8	6	4	7
2008	38	7	2	5	6	4	9	5	8	8	6	4	5	4	5	7	6	11
2008	39	7	4	5	6	5	6	2	5	10	4	0	5	5	6	6	6	7
2008	40	7	4	4	4	1	7	4	7	8	6	6	6	3	11	6	6	5
2008	41	7	4	4	7	3	7	2	7	10	6	5	4	5	5	6	3	4
2008	42	7	4	5	3	3	9	4	8	8	4	3	5	4	6	6	6	5
2008	43	7	3	4	4	1	2	3	7	10	7	4	5	5	5	6	5	3
2008	44	7	4	4	6	3	7	4	7	10	6	5	0	5	8	6	6	1
2008	45	7	4	5	4	2	9	4	9	8	4	4	5	5	6	6	5	4
2008	46	7	4	5	6	6	9	4	9	8	7	4	5	3	6	6	0	5
2008	47	7	4	4	3	6	7	4	7	9	6	6	6	3	7	6	6	5
2008	48	6	4	4	7	3	7	3	8	10	5	3	0	5	9	6	3	4
2008	49	0	4	0	6	3	7	3	9	9	7	4	0	0	6	0	0	8
2008	50	6	4	4	7	3	7	4	5	9	6	0	6	5	9	6	6	5
2008	51	7	4	5	4	1	7	4	8	8	6	3	0	5	9	6	6	6
2008	52	6	4	0	7	1	7	2	8	12	6	4	5	4	9	0	6	5
2008	53	7	4	4	6	3	7	4	2	9	5	6	6	4	9	4	6	5
2008	54	7	4	5	2	6	9	4	8	6	6	0	5	4	6	6	6	2
2008	55	7	4	0	6	5	6	3	10	10	5	4	5	0	6	6	3	8
2008	56	7	4	4	4	1	8	2	8	9	3	6	5	3	6	6	4	3
2008	57	7	4	5	6	3	7	4	7	9	5	5	0	3	6	6	0	7
2008	58	7	4	5	6	1	9	2	8	9	7	4	5	0	6	6	6	5
2008	59	7	4	4	6	1	9	4	8	8	7	4	5	0	6	6	6	8
2008	60	7	4	4	7	3	7	4	5	9	6	5	6	5	7	6	5	3
2008	61	7	0	4	7	3	7	4	10	9	4	1	5	5	11	6	4	5
2008	62	7	4	4	6	6	6	5	8	10	6	4	5	5	6	6	0	8
2008	63	7	4	5	5	5	7	2	8	9	6	3	5	3	6	0	0	10
2008	64	7	4	4	6	3	6	4	3	10	7	4	5	5	6	6	5	7
2008	65	7	4	4	5	3	7	3	5	9	6	5	5	6	9	5	4	4
2008	66	6	4	4	4	3	7	3	8	12	5	4	5	4	8	6	0	4
2008	67	7	4	5	6	1	9	4	8	9	4	4	5	5	6	6	6	5
2008	68	7	4	4	7	3	7	4	7	9	5	4	6	4	9	6	6	5
2008	69	7	4	4	6	3	7	4	7	9	6	6	6	5	7	6	5	3
2008	70	7	3	4	6	3	7	4	7	9	4	6	6	5	11	6	6	5
2008	71	7	3	0	6	3	7	0	7	9	4	6	0	0	11	0	6	5
2008	72	7	4	4	6	3	9	4	11	9	7	4	5	5	6	6	7	2
2008	73	7	4	4	5	3	7	4	7	9	0	3	6	3	5	6	6	5
2008	74	7	4	5	6	2	6	4	8	10	4	4	5	6	6	6	0	4
2008	75	7	4	5	6	3	7	4	3	10	5	4	5	3	6	6	6	2
2008	76	7	4	5	7	3	7	3	8	7	7	3	4	3	7	6	4	4
2008	77	7	4	4	4	6	7	4	7	8	5	6	5	4	4	6	3	3
2008	78	7	3	4	7	3	7	4	7	9	4	6	4	3	11	6	0	5
2008	79	7	4	4	6	3	6	3	8	7	5	4	4	4	9	6	4	4
2008	80	7	2	5	7	3	7	4	11	0	1	5	5	4	9	5	0	1
2008	81	7	4	4	5	3	7	4	3	10	6	0	6	5	9	6	6	5
2008	82	7	4	4	7	3	7	4	7	9	6	0	6	5	6	6	6	4
2008	83	7	4	4	7	3	7	4	7	9	6	4	6	4	8	6	0	1
2008	84	7	4	5	4	3	9	4	11	10	7	4	5	5	6	6	7	3
2008	85	7	4	4	5	3	7	3	7	8	3	5	5	6	9	6	4	4
2008	86	7	4	4	4	3	7	3	8	7	7	3	5	5	2	6	4	3
2008	87	7	4	4	7	3	7	4	7	9	3	2	0	6	12	6	6	5
2008	88	7	4	5	4	3	6	5	3	10	4	4	5	4	6	6	5	2
2008	89	7	4	4	5	3	7	4	7	9	6	5	6	5	9	6	0	5
2008	90	7	3	5	6	3	10	4	8	9	4	4	5	5	6	5	6	7
2008	91	5	2	4	6	1	7	2	7	5	4	4	5	3	6	0	0	2
2008	92	7	4	4	7	3	7	4	7	9	6	6	6	5	10	6	6	5
2008	93	7	4	4	7	3	7	4	7	10	5	7	6	4	5	6	4	4
2008	94	7	4	4	7	6	7	4	7	9	6	6	6	5	11	6	6	5
2008	95	7	4	4	7	3	7	5	2	9	6	5	6	5	9	6	6	10
2008	96	7	4	4	7	3	7	2	7	9	7	3	5	5	11	6	6	5
2008	97	7	4	4	7	2	7	3	6	9	5	3	6	5	8	6	5	4
2008	98	7	4	5	6	5	9	2	8	9	4	3	5	4	6	6	7	3
2008	99	7	4	5	6	6	9	4	11	9	7	4	5	5	6	6	7	3
2008	100	7	4	4	7	3	7	3	7	9	7	3	6	5	8	6	5	6
2008	101	7	4	4	4	1	7	5	7	9	6	5	6	7	9	6	6	5
2008	102	7	4	4	4	3	9	3	7	7	7	5	0	4	11	6	0	6
2008	103	7	4	4	6	3	7	3	7	7	8	3	4	5	8	6	0	4
2008	104	7	4	5	4	6	6	4	7	10	4	4	5	1	6	6	5	7
2008	105	0	4	4	6	0	7	3	8	9	4	1	0	5	6	4	6	3
2008	106	7	2	5	6	3	9	4	8	9	6	4	5	7	6	6	3	7
2008	107	7	4	4	6	3	7	3	7	9	6	3	5	5	9	6	4	4
2008	108	7	4	4	7	3	7	4	7	9	4	0	7	3	8	6	6	1
2008	109	7	4	4	7	3	7	5	7	9	4	5	6	3	11	6	6	5
2008	110	7	4	5	6	3	9	4	8	8	4	4	5	4	6	6	6	2
2008	111	7	4	5	6	1	6	4	7	9	4	4	5	5	6	6	4	7
2008	112	7	4	4	7	3	7	4	7	9	5	7	6	0	11	6	6	5
2008	113	7	2	5	6	3	6	4	8	10	6	4	4	0	6	6	0	7
2008	114	5	2	4	5	3	7	3	7	11	6	4	0	5	6	6	0	5
2008	115	7	4	5	6	4	6	5	8	10	7	4	5	3	6	6	5	3
2008	116	7	4	4	7	6	7	3	8	7	7	3	5	5	10	6	4	3
2008	117	7	4	5	6	1	6	3	8	10	6	4	5	4	6	6	7	7
2008	118	7	4	4	5	1	7	3	7	11	6	3	4	3	5	6	4	3
2008	119	0	2	4	6	3	7	0	7	6	6	3	6	5	11	6	4	5
2008	120	7	4	5	6	3	9	2	8	9	4	6	0	5	6	6	6	8
2008	121	7	4	5	3	3	12	3	8	8	5	4	5	6	6	6	5	3
2008	122	7	3	4	7	3	6	3	6	7	4	4	4	5	9	6	4	3
2008	123	7	4	5	6	2	11	4	8	8	5	4	5	4	6	6	5	10
2008	124	7	4	4	7	3	7	4	2	9	6	6	5	5	8	6	6	5
2008	125	7	4	4	7	3	7	4	2	9	6	6	5	4	8	6	6	5
2008	126	7	4	4	5	3	7	4	7	9	6	6	5	7	7	4	6	5
2008	127	7	2	5	6	6	9	4	1	9	4	4	5	3	6	6	3	7
2008	128	7	4	5	6	6	6	4	8	9	5	4	5	5	6	6	5	5
2008	129	7	2	5	3	5	9	4	8	8	7	4	5	0	6	6	6	7
2008	130	7	4	4	5	3	7	4	7	9	6	6	0	5	11	4	6	4
2008	131	7	0	0	7	3	7	0	7	9	6	6	0	6	9	0	6	4
2008	132	7	4	5	6	2	9	5	11	9	7	4	5	0	6	6	7	5
2009	133	7	5	4	6	6	8	0	7	9	5	4	0	1	9	6	6	3
2009	134	7	4	4	7	1	7	4	7	6	4	5	6	6	6	6	4	3
2009	135	7	4	4	6	4	7	3	7	7	6	3	5	3	9	6	4	2
2009	136	7	4	4	7	3	7	2	7	11	5	2	5	4	9	6	3	3
2009	137	7	4	4	7	3	7	3	3	10	5	7	6	6	5	6	5	4
2009	138	7	4	5	6	6	9	2	3	9	4	4	5	4	6	6	6	6
2009	139	7	4	4	7	3	6	3	8	7	4	2	5	4	9	6	4	0
2009	140	7	3	2	7	3	6	3	8	7	4	4	0	5	9	6	4	4
2009	141	6	4	0	7	3	7	3	8	7	4	4	3	5	9	6	4	4
2009	142	7	4	3	6	6	8	3	5	9	5	6	0	5	6	6	6	3
2009	143	8	4	5	6	4	6	4	8	9	5	4	6	0	6	6	6	1
2009	144	7	4	4	7	3	7	3	7	9	6	4	5	4	11	0	6	1
2009	145	7	4	4	7	3	7	4	7	9	5	4	5	0	7	6	5	5
2009	146	7	4	4	5	3	7	3	7	9	5	6	3	4	3	6	6	5
2009	147	7	4	5	6	6	5	4	2	9	5	4	5	5	11	6	6	4
2009	148	7	4	4	7	1	7	3	7	9	7	6	5	6	9	6	4	4
2009	149	7	4	3	7	3	3	5	7	9	7	5	5	5	5	6	4	3
2009	150	7	4	4	7	3	7	3	3	10	5	6	3	0	6	6	6	5
2009	151	7	4	4	6	3	7	4	3	9	7	6	6	3	11	6	6	4
2009	152	7	4	4	7	3	7	4	7	10	5	3	7	0	9	5	4	3
2009	153	3	4	4	7	4	7	2	8	10	5	3	5	5	9	6	0	1
2009	154	7	4	2	7	3	7	3	3	9	7	4	3	7	8	6	6	2
2009	155	7	4	5	6	6	9	2	8	9	5	6	0	5	6	6	5	1
2009	156	7	4	4	7	3	7	4	7	9	7	2	6	5	11	6	6	3
2009	157	7	4	5	7	6	4	2	8	0	5	2	0	5	6	6	0	3
2009	158	7	4	4	5	1	9	4	7	9	5	6	5	5	11	6	5	2
2009	159	6	4	6	6	1	6	3	8	11	4	4	5	5	9	6	6	7
2009	160	6	4	4	7	3	7	3	8	12	4	4	5	3	8	6	3	4
2009	161	7	4	2	7	1	7	0	7	9	7	6	5	5	6	6	4	4
2009	162	7	4	4	7	3	6	4	3	10	5	3	5	5	8	5	5	4
2009	163	7	4	4	7	3	7	4	7	9	5	5	5	0	13	6	6	2
2009	164	7	4	4	7	3	7	4	7	9	7	6	5	5	11	6	5	5
2009	165	7	4	4	7	3	8	2	7	8	5	6	5	7	4	6	6	5
2009	166	7	4	4	7	3	7	3	7	8	5	6	5	4	9	6	4	5
2009	167	7	4	4	7	3	7	4	3	9	5	5	5	5	7	6	6	5
2009	168	7	4	4	5	3	7	2	2	8	5	5	6	5	11	6	4	5
2009	169	7	4	5	6	6	10	3	5	9	5	6	5	5	6	6	6	0
2009	170	7	5	6	6	6	2	4	8	9	5	4	6	5	9	6	6	1
2009	171	7	4	4	6	3	7	4	7	9	5	4	5	6	10	6	4	1
2009	172	7	4	5	6	6	11	4	7	9	5	4	5	0	6	6	6	6
2009	173	7	4	5	6	6	9	3	5	8	5	4	5	3	6	6	5	3
2009	174	6	4	4	5	3	7	3	5	8	5	4	5	4	7	6	4	4
2009	175	7	1	3	6	6	7	3	9	9	5	4	6	4	8	6	6	1
2009	176	7	3	5	6	6	9	4	1	6	4	4	5	3	6	6	7	7
2009	177	7	1	5	6	6	9	3	9	9	5	2	6	7	6	6	6	9
2009	178	7	4	5	6	6	6	3	11	6	4	4	5	3	6	6	6	4
2009	179	7	4	4	7	3	4	4	7	9	5	5	6	6	8	6	6	1
2009	180	7	4	4	7	3	7	3	7	10	5	3	5	0	9	0	4	3
2009	181	7	4	5	6	6	0	3	8	8	5	4	5	5	6	6	6	5
2009	182	7	4	4	6	6	5	3	8	9	8	4	5	4	6	0	7	4
2009	183	7	4	4	7	3	6	4	6	9	5	4	6	5	9	6	4	1
2009	184	7	4	4	7	3	3	3	5	8	5	6	3	5	9	6	5	4
2009	185	7	4	4	7	3	7	4	8	7	5	3	6	5	5	6	4	4
2009	186	7	4	4	7	3	7	4	8	11	5	4	5	3	6	6	3	4
2009	187	7	4	4	7	3	3	2	7	9	7	4	5	5	11	6	6	3
2009	188	7	1	6	6	5	9	2	5	9	5	4	5	4	6	6	6	8
2009	189	7	3	5	6	4	9	4	8	8	4	4	5	5	6	6	5	2
2009	190	8	4	5	6	6	7	3	8	9	5	4	5	5	6	6	6	4
2009	191	7	4	4	5	1	4	4	7	9	5	6	5	5	10	6	4	1
2009	192	7	4	4	7	3	7	4	7	9	7	5	5	0	6	0	4	2
2009	193	7	4	4	7	3	7	4	8	9	5	6	7	0	12	6	6	1
2009	194	6	4	5	7	6	9	3	8	4	4	4	5	5	6	6	6	2
2009	195	7	4	4	5	3	7	3	3	9	5	5	5	4	11	6	6	2
2009	196	7	4	4	7	3	7	2	7	8	5	5	4	5	6	6	6	5
2009	197	7	5	4	7	3	6	2	6	9	5	4	5	5	6	0	4	3
2009	198	7	4	4	7	3	7	2	7	9	5	6	5	5	11	6	6	0
2009	199	7	4	4	7	3	7	4	7	8	7	6	6	5	11	6	5	2
2009	200	7	4	4	7	1	7	0	7	9	7	5	5	0	6	6	5	5
2009	201	7	4	4	5	3	7	2	7	9	5	6	5	4	6	6	6	3
2009	202	7	4	6	6	6	7	3	8	9	5	4	5	4	6	6	4	5
2009	203	7	4	5	6	8	2	3	8	9	4	4	0	5	6	6	7	1
2009	204	7	4	5	6	7	6	3	8	10	5	4	6	6	6	6	5	5
2009	205	7	4	5	6	6	9	3	11	9	4	4	0	3	6	6	7	6
2009	206	7	4	5	6	6	6	3	8	10	4	4	5	3	6	6	6	7
2009	207	7	4	5	6	6	9	2	3	9	5	4	5	7	8	6	6	5
2009	208	6	4	5	6	4	6	4	8	10	4	4	6	3	6	6	4	7
2009	209	6	4	4	7	3	6	3	8	12	4	3	4	4	9	6	3	2
2009	210	7	4	4	7	3	7	4	7	7	5	3	6	0	9	6	4	3
2009	211	6	4	2	7	3	7	3	8	10	4	4	5	3	9	6	3	4
2009	212	7	4	5	5	3	10	4	6	8	5	2	5	5	9	6	4	2
2009	213	7	4	5	6	1	7	3	8	9	5	3	5	3	9	6	7	4
2009	214	7	4	4	7	1	7	4	7	9	5	7	5	4	3	6	6	5
2009	215	7	4	4	7	3	7	4	7	9	7	3	5	5	6	6	6	5
2009	216	7	4	4	7	6	7	4	3	9	5	6	6	5	6	6	6	5
2009	217	7	4	4	6	3	7	4	3	9	5	6	6	3	11	6	6	5
2009	218	7	4	5	6	6	9	3	6	9	4	4	5	4	7	0	7	5
2009	219	7	4	5	6	4	6	3	1	10	4	4	4	0	6	0	6	7
2009	220	7	4	4	7	3	6	3	7	9	5	2	5	5	10	6	4	6
2009	221	6	4	4	7	3	7	4	8	10	9	4	6	4	10	6	3	3
2009	222	7	4	4	6	2	7	3	7	8	7	5	5	6	5	6	4	3
2009	223	6	3	4	7	3	2	4	8	11	4	4	6	5	9	6	3	3
2009	224	6	4	4	7	3	7	2	8	7	4	4	5	3	6	6	3	4
2009	225	7	4	4	7	1	7	4	5	8	5	3	6	4	6	6	4	4
2009	226	7	3	4	7	6	7	3	2	8	5	2	5	5	9	6	4	2
2009	227	7	4	4	8	3	5	4	7	8	5	4	6	5	11	6	4	3
2009	228	7	4	4	7	3	7	3	7	9	5	5	5	5	6	6	6	1
2009	229	7	4	4	5	3	4	3	5	8	7	5	5	5	9	6	4	2
2009	230	7	4	5	7	1	9	2	2	7	5	4	5	7	6	6	6	1
2009	231	7	4	4	7	3	7	3	7	9	5	5	4	5	4	6	6	5
2009	232	7	4	5	6	3	10	3	8	8	5	4	3	5	5	6	6	2
2009	233	7	5	4	7	3	7	4	6	9	5	4	6	4	9	6	6	5
2009	234	7	3	4	7	3	7	4	7	9	7	6	6	5	11	6	6	5
2009	235	7	4	4	7	3	7	4	7	9	5	6	5	5	10	6	6	5
2009	236	1	4	2	7	3	7	3	7	9	5	7	5	5	8	6	5	6
2009	237	7	4	4	7	3	7	4	7	9	7	6	5	5	11	0	6	5
2009	238	7	4	5	6	4	1	4	8	8	5	5	6	4	6	6	5	9
2009	239	7	3	4	6	1	6	3	7	9	4	4	4	5	6	6	6	3
2009	240	6	4	5	6	3	9	4	5	9	4	4	0	5	6	6	4	7
2009	241	7	4	5	6	6	9	3	3	9	4	4	5	0	6	6	7	7
2009	242	7	4	4	5	3	7	3	2	9	7	5	5	3	9	6	4	4
2009	243	7	3	4	7	3	6	4	8	7	4	4	5	5	2	6	4	4
2009	244	7	4	4	6	4	8	3	7	8	5	1	5	5	9	6	4	4
2009	245	7	4	4	7	3	3	3	7	8	5	4	4	0	9	6	1	3
2009	246	7	4	4	6	6	9	2	5	9	5	4	5	6	6	6	6	3
2009	247	7	4	2	6	3	6	4	7	10	5	2	5	4	8	6	4	5
2009	248	7	4	4	6	3	6	4	7	10	5	2	5	5	12	6	4	5
2009	249	7	4	4	7	4	7	3	8	7	5	3	0	5	8	6	4	2
2009	250	8	4	5	6	6	9	4	5	9	5	4	0	3	3	6	6	4
2009	251	7	4	5	6	6	6	4	5	10	4	4	5	5	6	6	6	4
2009	252	7	4	3	6	4	6	3	8	10	4	4	3	5	6	6	5	7
2009	253	7	4	4	5	3	7	4	5	10	7	5	5	5	9	5	4	3
2009	254	7	4	5	6	6	6	2	10	9	5	4	4	3	6	6	6	7
2009	255	7	4	4	7	3	7	2	7	9	5	6	5	5	3	6	6	5
2009	256	7	3	2	7	3	1	4	8	7	4	4	0	5	9	0	4	2
2009	257	7	3	2	6	3	7	3	3	7	4	4	5	5	9	6	3	2
2009	258	7	4	4	7	3	7	3	7	7	5	4	5	9	6	6	3	2
2009	259	7	2	3	6	5	9	3	8	9	5	4	5	5	6	6	3	7
2009	260	7	4	5	6	5	9	0	8	9	5	4	0	0	6	6	7	6
2009	261	7	4	5	6	6	6	4	8	10	4	4	5	5	6	6	5	7
2009	262	7	4	4	7	3	7	4	7	9	5	5	6	0	6	6	6	5
2009	263	7	4	4	7	3	7	3	7	9	5	5	5	0	11	6	6	5
2009	264	7	4	5	6	1	9	2	9	9	4	4	4	6	6	6	7	4
2009	265	7	4	5	6	3	6	4	2	8	5	4	6	5	10	6	5	5
2009	266	7	4	4	7	3	3	4	8	8	5	5	6	6	10	6	4	3
2009	267	6	4	4	7	3	7	4	8	9	4	4	5	4	9	6	3	4
2009	268	6	2	4	5	3	3	4	8	10	5	4	5	5	9	6	3	4
2009	269	7	4	4	7	2	7	4	2	9	5	3	5	4	8	6	5	4
2009	270	7	4	5	6	6	6	4	7	10	4	5	5	5	6	6	5	4
2009	271	7	4	5	4	5	9	3	8	5	5	4	5	5	3	6	4	3
2009	272	7	4	5	6	6	8	2	1	9	4	4	5	5	6	6	7	4
2009	273	6	3	4	5	3	6	3	11	7	4	4	3	5	9	6	4	4
2009	274	7	4	5	6	6	9	0	3	9	5	4	3	4	6	6	6	3
2009	275	7	4	4	7	3	7	4	2	9	7	5	6	5	11	6	5	5
2009	276	7	4	5	6	6	9	2	8	9	4	4	5	3	6	6	7	4
2009	277	7	4	4	7	3	4	3	7	8	5	6	5	5	7	6	6	5
2009	278	7	4	6	6	5	6	3	7	9	6	4	0	0	6	6	5	6
2009	279	7	4	5	6	6	8	3	8	9	5	4	3	6	6	6	6	3
2009	280	7	4	4	7	1	7	3	7	7	5	4	5	4	11	6	6	4
2009	281	7	4	5	6	6	9	5	5	11	4	4	5	5	6	6	6	3
2009	282	7	4	5	6	6	9	4	2	9	4	4	5	0	6	6	6	1
2010	283	7	4	0	7	3	7	3	7	6	5	7	0	4	5	0	4	4
2010	284	7	3	4	7	6	0	3	7	8	5	3	5	3	9	6	4	2
2010	285	7	4	5	6	6	0	0	0	9	4	4	5	5	6	0	7	3
2010	286	7	4	5	6	5	7	4	8	9	5	5	5	7	6	6	3	3
2010	287	7	5	4	7	3	9	5	7	9	7	8	7	5	0	6	7	0
2010	288	7	4	4	6	3	0	4	7	9	7	3	5	5	11	6	6	6
2010	289	7	4	4	7	3	7	3	7	10	5	3	5	3	9	5	4	3
2010	290	7	4	4	6	3	7	3	6	8	5	4	3	0	7	6	4	3
2010	291	7	4	4	7	4	7	3	7	10	5	5	5	5	8	6	4	2
2010	292	7	4	4	7	3	0	3	7	10	5	4	6	5	6	6	4	3
2010	293	7	4	5	6	6	6	0	8	8	5	1	5	4	6	6	5	11
2010	294	7	4	4	7	3	9	4	7	8	7	5	5	5	7	6	6	6
2010	295	7	4	0	0	3	7	0	7	8	4	5	0	5	7	0	6	3
2010	296	7	5	4	7	3	7	3	8	9	5	5	4	3	9	0	4	4
2010	297	7	3	4	7	3	12	3	8	7	4	3	1	5	9	6	4	3
2010	298	7	4	0	3	6	6	3	7	8	5	1	0	0	7	6	4	3
2010	299	7	4	5	6	9	9	4	8	8	5	4	5	4	6	6	5	11
2010	300	7	0	5	1	6	7	4	8	8	5	5	5	4	6	6	5	3
2010	301	7	4	4	7	3	7	4	7	7	5	4	6	5	11	6	4	3
2010	302	7	4	4	7	3	9	3	7	9	5	5	6	5	7	6	6	5
2010	303	7	4	4	7	3	7	4	7	9	5	5	6	5	0	6	6	5
2010	304	7	4	5	7	6	7	4	6	10	4	6	5	5	6	6	5	0
2010	305	7	4	4	7	3	10	3	7	10	5	3	3	5	9	6	4	0
2010	306	7	4	4	7	3	7	3	7	8	7	3	3	5	7	6	4	4
2010	307	7	4	4	7	3	7	4	7	9	5	5	6	5	7	6	6	5
2010	308	7	2	5	6	5	9	4	9	9	4	3	0	0	6	5	5	7
2010	309	7	4	4	7	4	7	3	7	9	7	4	5	5	9	6	5	2
2010	310	7	4	5	0	3	7	3	0	9	5	4	0	0	7	6	6	3
2010	311	7	4	4	6	6	7	2	8	9	5	4	0	4	6	6	6	10
2010	312	7	2	5	6	6	8	4	8	9	4	4	5	5	6	6	7	3
2010	313	7	2	5	6	5	7	4	3	9	5	5	0	3	5	6	3	7
2010	314	7	4	4	7	3	7	4	7	10	5	6	6	5	12	6	6	5
2010	315	7	4	4	7	2	7	3	6	9	5	3	6	4	4	6	5	4
2010	316	7	4	5	6	5	0	2	8	9	5	5	4	4	5	6	7	0
2010	317	7	4	4	7	3	7	4	7	8	5	5	6	5	11	6	6	6
2010	318	7	4	4	7	3	9	3	7	7	5	1	5	5	9	4	4	4
2010	319	7	4	4	7	3	0	4	7	8	7	3	5	5	7	6	6	3
2010	320	7	4	4	7	3	9	3	8	7	5	3	5	5	7	6	4	3
2011	321	7	4	4	0	3	0	3	6	4	0	5	5	0	9	6	4	9
2011	322	7	4	6	0	5	0	4	8	6	0	3	5	0	6	6	6	8
2011	323	7	4	2	0	3	0	4	7	7	0	3	5	0	9	6	6	3
2011	324	7	4	4	0	3	0	4	7	5	0	2	5	0	11	6	6	7
2011	325	7	4	4	0	3	0	3	7	4	0	5	5	0	9	6	4	9
2011	326	7	4	5	0	6	0	3	8	7	0	3	4	0	6	6	7	7
2011	327	7	4	5	0	3	0	2	8	6	0	4	5	0	6	6	6	8
2011	328	7	4	4	0	3	0	3	7	5	0	5	6	0	11	6	6	9
2011	329	7	4	4	0	3	0	4	7	6	0	3	0	0	8	6	6	6
2011	330	7	4	4	0	3	0	4	7	5	0	5	6	0	11	6	6	9
2011	331	7	4	3	0	6	0	3	8	7	0	5	5	0	6	6	5	8
2011	332	7	4	4	0	3	0	4	7	5	0	5	5	0	8	6	6	6
2011	333	7	3	4	0	6	0	3	1	2	0	5	5	0	9	6	4	9
2011	334	7	4	4	0	2	0	5	7	6	0	5	5	0	11	6	6	9
2011	335	7	4	2	0	3	0	3	8	4	0	3	5	0	9	6	4	8
2011	336	6	4	4	0	3	0	4	7	5	0	5	4	0	11	6	6	9
2011	337	7	4	5	0	4	0	2	8	5	0	3	5	0	6	6	6	8
2011	338	7	4	5	0	6	0	2	8	10	0	5	5	0	6	6	5	8
2011	339	7	4	4	0	3	0	5	7	6	0	5	5	0	11	6	6	9
2011	340	7	4	4	0	3	0	4	7	6	0	6	5	0	11	6	6	9
2011	341	7	4	4	0	3	0	3	8	4	0	3	5	0	8	6	3	9
2011	342	7	4	4	0	3	0	3	7	5	0	5	6	0	11	6	3	9
2011	343	7	4	4	0	3	0	3	6	2	0	3	5	0	9	6	4	9
2011	344	7	4	4	0	1	0	4	7	5	0	3	6	0	9	6	5	9
2011	345	7	4	4	0	3	0	4	7	6	0	4	5	0	9	6	6	9
2011	346	7	4	4	0	3	0	3	7	2	0	3	5	0	14	6	6	9
2011	347	7	4	4	0	3	0	4	7	5	0	5	5	0	10	6	6	9
2011	348	7	4	4	0	3	0	4	7	4	0	3	4	0	8	6	4	9
2011	349	7	4	2	0	3	0	5	1	4	0	5	6	0	10	6	6	8
2011	350	7	4	5	0	6	0	2	8	5	0	3	4	0	6	6	4	8
2011	351	6	4	4	0	3	0	3	8	4	0	5	5	0	9	6	3	9
2011	352	8	4	5	0	6	0	4	8	7	0	5	4	0	6	6	7	8
2011	353	7	2	5	0	5	0	4	8	7	0	3	5	0	6	6	3	8
2011	354	7	4	4	0	3	0	4	7	5	0	6	7	0	11	6	6	9
2011	355	7	4	4	0	4	0	0	7	2	0	4	5	0	9	0	4	9
2011	356	7	0	4	0	3	0	4	7	5	0	5	6	0	11	6	6	9
2011	357	7	4	4	0	3	0	3	7	4	0	3	0	0	9	6	5	7
2011	358	7	4	2	0	3	0	4	7	5	0	5	6	0	4	6	6	9
2011	359	7	4	2	0	3	0	4	7	4	0	5	6	0	11	6	6	9
2011	360	6	4	5	0	6	0	2	7	1	0	4	5	0	6	6	5	8
2011	361	7	4	5	0	6	0	4	8	7	0	5	0	0	6	6	7	8
2011	362	7	4	4	0	3	0	3	7	4	0	3	5	0	5	6	4	9
2011	363	7	4	0	0	3	0	0	7	4	0	3	0	0	9	6	6	9
2011	364	7	4	5	0	6	0	4	8	7	0	4	5	0	6	6	5	8
2011	365	7	4	2	0	3	0	3	7	5	0	3	4	0	11	6	4	9
2011	366	7	4	4	0	3	0	4	7	5	0	6	6	0	9	6	4	9
2011	367	7	4	5	0	6	0	3	8	4	0	2	5	0	3	6	5	8
2011	368	7	4	2	0	3	0	4	7	5	0	5	6	0	11	6	6	6
2011	369	7	4	4	0	3	0	3	8	4	0	5	4	0	9	6	4	8
2011	370	7	4	4	0	3	0	4	7	5	0	7	6	0	11	6	6	0
2011	371	7	4	5	0	6	0	4	8	7	0	6	5	0	6	6	6	8
2011	372	7	4	5	0	6	0	4	9	5	0	5	5	0	7	6	6	8
2011	373	7	4	5	0	4	0	4	8	7	0	4	5	0	6	6	6	8
2011	374	7	4	5	0	6	0	4	9	4	0	3	5	0	6	6	7	8
2011	375	7	4	2	0	3	0	3	5	4	0	6	5	0	9	6	4	9
2011	376	7	4	5	0	6	0	4	9	7	0	3	5	0	6	6	6	8
2011	377	7	4	5	0	3	0	2	8	7	0	4	5	0	6	6	7	8
2012	378	7	4	4	4	1	9	0	7	9	7	3	5	5	11	5	0	0
2012	379	7	4	4	7	5	9	3	10	9	5	4	6	5	6	6	7	7
2012	380	7	4	5	6	6	9	4	9	8	5	4	4	5	6	6	5	5
2012	381	7	0	0	4	1	6	0	9	9	5	0	0	4	6	0	0	7
2012	382	7	4	4	5	3	7	4	7	9	5	9	6	5	9	6	4	5
2012	383	7	4	5	6	3	7	4	7	9	5	4	6	5	11	4	3	6
2012	384	7	4	4	6	6	6	4	9	10	4	4	6	5	6	6	3	7
2012	385	7	4	4	4	1	9	2	8	9	5	4	5	4	6	6	5	0
2012	386	7	4	5	6	6	11	3	8	8	5	2	5	4	6	6	5	10
2012	387	7	4	2	4	3	7	3	7	10	7	7	6	6	1	6	5	5
2012	388	7	0	0	6	3	7	0	7	9	7	0	0	5	11	0	0	5
2012	389	7	4	4	4	3	7	3	7	11	5	5	5	5	9	6	7	4
2012	390	7	4	5	7	3	7	4	8	9	7	3	5	5	9	6	4	6
2012	391	7	4	4	4	3	7	3	7	9	7	3	5	5	9	6	4	6
2012	392	7	2	4	6	3	7	0	7	7	7	3	5	5	11	6	6	6
2012	393	7	4	4	4	3	9	2	7	10	5	7	6	6	7	6	3	5
2012	394	7	4	4	7	3	7	3	7	10	7	5	5	5	9	6	6	4
2012	395	7	3	5	4	3	7	3	7	9	7	4	5	5	9	6	4	4
2012	396	7	4	4	4	3	8	3	7	8	7	7	4	5	5	6	3	4
2012	397	7	0	0	6	6	6	0	0	10	4	0	0	5	6	0	0	8
2012	398	7	0	0	6	6	6	0	8	10	4	0	0	5	6	0	0	7
2012	399	7	4	4	4	3	7	5	7	9	7	5	5	5	11	6	4	6
2012	400	7	4	4	6	3	7	4	7	8	5	3	6	5	11	6	4	5
2012	401	7	5	5	5	3	7	4	7	9	5	8	5	5	8	6	7	6
2012	402	7	4	5	0	3	7	3	7	9	5	3	6	5	11	6	5	4
2012	403	7	4	4	7	1	7	3	7	8	5	4	5	5	9	6	5	5
2012	404	7	4	5	4	1	9	3	8	9	5	4	6	6	6	6	5	0
2012	405	7	4	0	0	1	9	3	8	9	5	5	5	6	6	6	6	7
2012	406	7	4	2	6	6	6	4	7	9	4	6	5	7	6	5	6	7
2012	407	7	4	4	4	3	7	0	7	10	5	8	0	4	5	6	4	5
2012	408	7	4	4	4	1	7	0	6	0	6	3	5	4	8	6	5	0
2012	409	7	4	4	5	2	6	3	8	10	4	4	5	5	6	6	6	7
2012	410	7	4	4	6	6	9	4	12	9	4	7	5	5	6	6	4	14
2012	411	7	0	0	5	3	7	0	7	9	7	0	0	5	10	0	0	6
2012	412	7	4	5	7	3	7	0	7	9	5	4	6	5	9	6	4	5
2012	413	7	4	5	7	3	7	4	7	10	5	7	6	4	5	6	6	5
2012	414	7	4	2	6	3	7	0	7	9	5	7	6	5	9	6	4	5
2012	415	7	4	2	4	3	9	3	8	9	4	5	5	5	6	6	6	7
2012	416	7	0	0	4	2	6	0	8	10	4	4	0	5	6	0	4	7
2012	417	7	4	4	7	3	7	3	7	7	2	7	5	4	9	6	0	4
2012	418	6	4	5	7	3	7	3	8	13	4	4	5	4	9	6	5	4
2012	419	7	4	5	6	3	7	2	7	8	5	7	5	6	9	6	6	3
2012	420	7	4	4	4	3	7	4	7	8	5	3	0	4	1	6	4	5
2012	421	7	4	4	5	5	9	2	8	9	5	4	5	4	6	6	6	4
2012	422	7	4	4	6	3	10	3	6	8	5	2	5	4	9	6	4	2
2012	423	7	4	5	6	3	9	2	8	9	5	2	5	4	6	6	3	11
2012	424	7	4	4	3	5	6	3	5	10	4	4	5	5	6	6	4	8
2012	425	7	0	0	7	3	7	0	7	10	7	0	0	5	7	0	0	5
2012	426	7	0	0	8	6	6	0	8	10	4	0	0	5	6	0	0	7
2012	427	7	4	5	6	6	9	4	12	10	4	7	5	5	6	6	7	11
2012	428	7	4	4	5	6	11	4	8	8	5	4	5	3	6	6	5	11
2012	429	7	4	5	4	1	9	3	8	9	5	4	5	4	6	6	5	10
2012	430	7	4	3	8	3	6	3	3	11	5	3	6	4	8	6	4	4
2012	431	6	4	2	6	3	7	3	8	10	4	7	5	4	6	6	6	3
2012	432	7	4	5	4	3	7	3	7	10	5	7	6	4	5	6	5	5
2012	433	7	4	2	6	3	7	4	7	9	7	5	7	5	12	6	2	2
2012	434	7	4	5	4	2	9	2	8	9	5	5	5	4	6	6	6	0
2012	435	7	2	4	5	5	9	0	8	8	5	4	5	5	6	6	8	5
2012	436	7	4	5	6	3	7	4	7	9	5	7	6	5	11	6	7	5
2012	437	7	4	5	6	6	9	4	12	9	4	4	5	5	6	6	6	14
2012	438	7	4	4	0	3	7	3	7	8	5	3	4	5	5	6	7	7
2012	439	7	4	4	6	6	9	3	8	9	5	4	5	5	6	6	7	13
2012	440	7	4	5	4	1	7	4	7	9	7	2	5	5	11	6	7	6
2012	441	7	4	4	5	6	6	4	8	9	4	4	5	5	6	6	4	7
2012	442	6	4	2	6	3	7	4	8	11	4	4	5	4	9	6	3	4
2012	443	7	0	2	4	1	6	3	0	10	4	0	5	5	6	6	0	7
2012	444	6	4	5	7	3	1	3	0	10	4	4	5	4	9	6	6	3
2012	445	7	4	4	7	3	7	3	7	9	5	4	6	5	11	6	5	5
2012	446	7	4	4	6	3	7	4	7	10	5	8	6	4	5	6	7	4
2012	447	7	4	5	4	3	7	0	7	7	7	3	5	4	9	6	5	4
2012	448	7	4	5	5	6	6	4	8	10	4	4	5	5	6	6	6	7
2012	449	7	4	5	6	3	7	4	7	9	5	7	6	5	5	4	7	5
2012	450	7	4	5	6	6	6	4	8	10	4	4	5	4	3	6	5	6
2012	451	7	4	0	4	3	7	0	8	11	5	5	2	7	10	0	5	3
2012	452	7	4	5	7	2	7	0	6	9	5	3	6	4	8	6	7	4
2012	453	7	4	0	7	3	6	0	7	9	5	6	0	5	3	0	6	4
2012	454	7	4	2	6	6	9	3	8	9	4	4	5	5	6	6	5	7
2012	455	7	4	4	7	3	7	3	7	11	5	4	3	5	9	6	3	5
2012	456	7	4	6	4	1	0	3	0	9	4	4	5	5	6	6	4	7
2012	457	7	4	5	4	1	0	3	0	9	4	4	5	5	6	6	4	7
2013	458	7	4	4	6	3	7	3	8	9	7	6	4	5	9	6	7	4
2013	459	7	2	5	6	5	9	4	8	9	2	4	5	7	6	6	3	7
2013	460	7	4	2	7	3	7	3	7	8	2	4	5	5	9	6	5	4
2013	461	7	4	4	4	3	7	3	8	8	5	3	5	4	9	6	5	4
2013	462	7	4	2	7	3	7	3	8	9	7	5	5	5	9	6	3	4
2013	463	7	4	5	6	6	9	3	8	3	4	4	5	5	6	6	5	4
2013	464	7	4	5	6	6	9	2	7	9	5	6	5	6	6	6	5	4
2013	465	7	4	2	4	3	7	3	1	9	7	0	4	5	9	6	5	4
2013	466	7	4	5	6	6	9	4	7	8	5	4	4	6	6	0	6	5
2013	467	7	4	2	7	3	7	3	7	9	1	5	6	5	11	6	7	6
2013	468	7	4	4	5	3	7	1	7	9	5	1	6	5	9	6	5	5
2013	469	7	4	4	5	3	7	4	8	9	5	6	6	5	9	6	6	7
2013	470	7	4	2	7	3	7	4	8	9	5	5	6	5	11	6	6	5
2013	471	7	2	5	5	5	9	4	7	8	5	4	5	5	6	6	6	6
2013	472	7	4	2	5	3	7	3	10	9	7	6	6	5	6	6	5	5
2013	473	7	4	4	7	3	7	4	7	9	7	3	5	5	9	6	5	6
2013	474	7	4	4	7	3	7	4	8	8	5	3	5	4	10	0	6	4
2013	475	7	4	5	7	3	7	2	8	8	5	6	5	4	9	6	5	7
2013	476	7	4	5	7	6	9	4	7	9	4	4	0	5	6	6	3	3
2013	477	6	4	2	4	3	7	3	8	10	4	4	5	4	9	6	7	4
2013	478	7	4	4	7	3	7	4	7	0	5	6	6	5	9	6	6	2
2013	479	7	3	2	6	3	7	3	7	10	5	1	4	5	9	6	4	3
2013	480	7	4	4	6	3	7	3	9	11	5	4	5	5	9	6	4	2
2013	481	7	4	0	6	3	7	0	8	9	5	6	0	0	6	0	4	5
2013	482	7	4	4	6	3	7	3	8	7	5	2	6	4	7	6	4	4
2013	483	7	2	5	6	5	11	4	8	8	5	4	5	5	6	6	6	6
2013	484	7	4	2	4	3	7	4	1	9	4	4	5	5	9	6	3	4
2013	485	7	4	2	6	3	7	3	7	7	5	2	5	5	9	6	4	4
2013	486	5	4	5	6	6	9	3	8	8	4	4	4	5	6	6	6	7
2013	487	7	4	5	6	6	1	3	10	0	5	4	0	4	6	6	5	5
2013	488	2	4	4	5	3	7	3	7	8	3	1	4	5	5	4	7	5
2013	489	7	0	5	6	6	6	5	8	6	4	4	5	5	6	6	5	1
2013	490	7	2	5	6	5	9	4	8	9	5	3	6	7	6	6	3	7
2013	491	7	4	2	7	3	7	4	7	9	5	5	6	5	12	6	6	5
2013	492	7	4	3	6	3	1	4	1	9	5	4	6	5	6	6	7	7
2013	493	6	4	5	6	6	9	4	8	8	5	5	4	6	6	6	5	5
2013	494	7	4	2	4	3	7	2	8	8	1	3	0	5	9	0	5	6
2013	495	7	4	2	7	3	7	4	2	9	4	6	0	5	11	6	6	5
2013	496	7	4	4	6	3	7	4	1	8	5	8	6	5	10	6	5	5
2013	497	7	4	2	7	3	7	4	8	10	5	6	6	4	9	6	5	5
2013	498	7	4	4	5	1	9	4	10	9	5	3	5	5	9	6	6	1
2013	499	7	4	4	5	3	7	4	1	10	5	5	6	3	11	6	6	5
2013	500	7	4	5	6	6	6	3	5	10	4	4	5	5	6	6	7	4
2013	501	7	4	5	6	6	9	4	8	7	5	4	0	5	6	6	5	5
2013	502	7	3	2	7	3	6	3	8	7	4	4	3	4	9	6	4	4
2013	503	7	4	4	7	3	4	4	7	9	5	6	6	5	11	6	6	6
2013	504	7	0	4	7	3	7	4	8	9	5	5	0	5	4	6	6	5
2013	505	7	4	5	4	4	9	4	8	9	5	4	0	7	6	5	7	7
2013	506	7	3	4	7	3	6	3	1	7	4	3	5	4	9	6	4	3
2013	507	7	4	0	6	6	9	2	8	9	5	4	3	5	6	6	6	1
2013	508	7	4	5	6	5	6	2	7	9	5	4	4	4	6	6	7	1
2013	509	7	4	6	6	5	9	2	7	9	5	4	5	4	6	5	6	8
2013	510	7	4	6	6	5	9	2	1	9	5	4	5	4	6	0	6	1
2013	511	7	2	5	5	5	9	4	1	9	5	4	5	7	6	6	4	7
2013	512	7	4	5	6	5	10	2	9	9	5	4	5	4	6	6	7	1
2013	513	7	4	5	6	4	9	3	7	8	5	4	5	5	6	6	5	7
2013	514	7	4	4	6	5	9	4	11	9	4	4	5	4	6	6	6	2
2013	515	7	4	4	7	3	7	5	7	9	7	3	5	4	9	6	4	6
2013	516	7	4	4	1	3	7	4	10	9	3	6	4	5	11	6	4	5
2013	517	7	4	4	7	3	7	4	8	9	5	6	6	5	9	5	6	5
2013	518	7	4	4	7	3	7	3	8	8	5	6	6	5	11	6	5	5
2013	519	6	4	5	6	10	11	4	7	8	5	4	5	4	6	6	5	1
2013	520	7	4	5	6	3	7	4	8	9	5	4	5	5	6	6	4	5
2013	521	7	0	5	6	7	6	0	7	9	5	4	5	7	6	6	7	7
2013	522	7	4	4	4	3	7	3	8	9	5	6	5	5	9	6	5	2
2013	523	7	4	4	6	3	7	3	8	7	4	4	4	4	9	6	4	2
2013	524	7	4	4	7	3	7	3	8	8	5	3	3	6	9	6	3	3
2013	525	7	4	4	7	3	7	3	7	7	5	2	6	5	9	6	4	4
2013	526	7	4	4	7	3	4	3	7	10	3	5	5	5	9	6	4	4
2013	527	7	4	4	7	3	7	3	8	9	5	4	4	5	9	6	7	4
2013	528	7	4	4	7	3	7	3	11	6	1	5	3	5	5	0	2	4
2013	529	7	4	4	7	3	7	4	1	8	5	5	6	5	8	6	6	5
2013	530	7	3	5	6	6	1	2	8	9	2	4	5	6	6	6	5	1
2013	531	7	4	2	7	3	7	4	7	9	5	5	6	5	11	6	6	5
2013	532	7	4	5	3	5	6	2	7	9	5	4	4	4	6	6	7	4
2013	533	7	4	4	7	3	7	4	8	9	5	4	6	5	11	6	6	5
2013	534	7	4	5	6	6	9	4	8	9	4	4	5	5	6	6	5	1
2013	535	7	3	2	7	6	6	3	7	7	4	4	3	4	9	6	4	3
2013	536	7	4	5	6	6	4	4	7	6	4	4	5	5	6	6	3	2
2013	537	7	4	2	7	3	7	3	1	7	5	3	5	5	8	5	4	4
2013	538	7	4	2	7	3	7	4	8	9	5	6	6	5	11	6	6	5
2013	539	7	4	5	6	5	9	2	11	9	5	4	5	4	6	6	4	5
2013	540	7	4	5	6	6	6	4	7	10	4	4	5	5	6	6	5	7
2013	541	7	4	2	7	3	6	4	9	9	6	6	0	5	11	6	3	5
2013	542	7	4	2	7	3	7	4	7	8	5	6	6	5	11	6	6	1
2013	543	7	4	2	7	3	7	3	7	9	5	3	5	4	9	5	4	2
2014	544	7	4	4	7	3	7	3	7	10	7	4	8	5	9	4	4	1
2014	545	7	3	5	6	3	8	0	8	9	5	4	7	5	6	0	0	9
2014	546	7	4	4	7	3	7	6	7	9	5	5	8	4	11	4	6	3
2014	547	7	0	5	5	6	9	3	6	8	5	2	7	3	9	4	4	0
2014	548	7	4	5	6	3	8	2	8	9	5	4	7	5	6	2	0	10
2014	549	7	4	5	6	3	6	0	8	10	4	4	0	5	6	0	5	7
2014	550	7	4	4	7	4	7	5	7	9	5	5	8	4	12	4	6	5
2014	551	7	4	0	7	6	7	4	7	8	5	4	9	4	9	4	5	5
2014	552	7	4	4	7	3	7	0	7	10	5	6	6	5	11	4	6	5
2014	553	7	4	4	7	3	6	0	7	9	7	4	5	5	9	2	3	5
2014	554	7	4	4	7	6	7	0	8	12	4	6	6	3	8	4	3	1
2014	555	7	4	4	7	3	7	3	8	7	5	3	5	3	9	0	0	1
2014	556	7	4	4	6	3	6	4	8	8	5	4	5	0	12	6	5	4
2014	557	0	4	6	7	3	7	0	7	9	1	4	5	0	9	6	6	7
2014	558	7	0	4	7	3	7	4	0	6	1	0	0	0	6	5	6	4
2014	559	0	4	3	6	3	1	0	8	8	1	4	3	0	11	7	0	5
2014	560	7	4	5	0	6	6	4	9	10	4	4	5	5	11	6	5	7
2014	561	7	4	5	7	3	7	4	7	9	5	6	6	4	6	5	0	5
2014	562	7	4	5	7	7	8	4	7	8	5	3	5	0	13	0	4	5
2014	563	7	4	4	7	3	7	5	7	9	5	3	4	4	11	6	6	5
2014	564	7	2	5	6	4	8	4	10	8	5	4	0	5	9	0	6	6
2014	565	7	2	5	6	4	8	4	10	8	5	4	5	5	10	5	0	6
2014	566	7	4	5	6	6	10	4	8	8	5	4	4	3	6	5	0	4
2014	567	8	4	4	7	4	7	3	7	9	5	4	5	4	9	7	0	2
2014	568	6	4	4	6	3	7	3	8	10	4	3	5	3	9	8	4	4
2014	569	0	4	2	6	5	7	2	8	9	5	4	5	3	11	4	6	14
2015	570	7	4	5	6	3	8	5	3	9	4	6	7	5	6	6	0	15
2015	571	7	4	4	5	6	7	3	4	9	7	5	7	5	9	0	0	1
2015	572	7	4	4	7	3	7	4	7	9	5	6	7	4	9	6	6	5
2015	573	7	4	4	7	7	7	3	7	8	7	4	6	4	9	7	4	1
2015	574	7	4	5	5	3	8	2	6	9	5	2	6	3	6	6	4	8
2015	575	7	0	0	7	3	7	4	7	8	5	6	8	3	10	7	0	7
2015	576	7	4	4	7	3	7	3	7	8	7	5	5	4	5	0	4	12
2015	577	7	4	5	6	6	8	4	3	9	4	5	7	5	6	4	0	13
2015	578	8	4	4	8	3	7	4	7	9	5	5	6	4	14	3	6	6
2015	579	7	4	5	6	6	8	0	8	10	4	4	5	5	9	7	5	7
2015	580	7	4	5	6	6	8	4	7	9	4	4	5	5	9	6	6	6
2015	581	7	0	4	7	3	7	3	7	10	7	4	7	4	6	0	4	1
2015	582	7	4	4	7	3	6	3	7	10	7	2	5	5	5	6	6	7
2015	583	7	0	5	6	6	10	4	8	0	5	0	0	3	5	5	5	11
2015	584	7	4	4	7	3	7	0	7	8	5	6	6	3	6	0	0	6
2015	585	7	4	4	7	3	7	4	7	9	7	3	5	4	6	6	6	6
2015	586	7	0	4	7	3	7	4	7	9	7	3	6	4	11	8	3	5
2015	587	7	4	5	6	5	8	3	9	9	4	4	5	5	9	6	0	6
2015	588	7	4	5	6	6	6	0	8	10	4	4	5	6	6	0	0	7
2015	589	7	0	0	7	3	7	4	7	9	7	3	5	9	11	6	7	7
2015	590	7	5	4	7	3	7	4	7	9	5	3	5	4	11	4	5	4
2015	591	7	0	5	6	4	8	4	7	9	4	4	5	5	13	0	7	12
2015	592	7	4	1	0	3	7	0	7	9	5	3	5	4	6	0	0	6
2015	593	6	4	4	7	3	7	3	8	11	4	4	5	3	6	4	3	1
2015	594	7	4	4	6	6	8	0	8	10	5	6	5	4	5	0	0	7
2015	595	7	4	4	7	3	6	3	8	7	4	0	0	3	6	7	0	4
2015	596	7	3	4	6	3	7	3	8	7	4	4	6	3	9	4	4	1
2015	597	7	4	5	6	6	8	3	8	9	4	4	5	5	14	9	0	7
2015	598	7	4	4	6	3	6	3	8	7	4	4	5	3	6	7	4	4
2016	599	7	4	4	7	3	7	4	7	9	5	5	0	4	12	6	6	5
2016	600	7	4	0	6	3	8	5	7	9	4	4	7	5	6	4	6	13
2016	601	7	4	4	7	3	7	0	7	9	5	5	0	4	9	0	0	5
2016	602	7	4	5	6	5	8	0	8	9	4	4	6	5	6	6	7	13
2016	603	7	4	4	6	3	7	4	7	9	5	5	8	4	11	4	6	1
2016	604	7	4	4	5	3	7	3	3	9	7	5	0	4	0	4	4	1
2016	605	7	4	5	6	3	8	4	8	9	4	4	6	5	6	4	6	7
2016	606	7	4	5	6	4	6	0	8	10	4	4	6	2	6	6	5	6
2016	607	7	4	4	7	7	7	4	7	9	7	3	0	4	11	5	6	6
2016	608	7	4	4	7	3	7	4	7	9	5	6	7	4	11	0	6	5
2016	609	7	4	4	7	3	7	0	7	9	5	0	7	4	7	0	6	5
2016	610	6	4	5	6	3	6	0	8	10	4	5	6	5	6	3	0	7
2016	611	7	4	4	7	3	7	5	7	9	5	7	7	4	0	5	6	5
2016	612	7	4	4	7	4	7	3	7	8	5	4	4	5	9	0	0	1
2016	613	7	4	4	7	3	7	3	7	9	7	6	6	5	6	6	5	5
2016	614	7	3	5	6	6	6	4	8	0	4	4	5	5	10	6	5	0
2016	615	7	4	5	6	6	6	5	8	10	4	4	5	5	9	6	0	7
2016	616	7	4	0	6	6	10	4	8	8	5	4	5	3	8	6	5	11
2016	617	7	4	4	7	3	7	4	7	9	5	6	6	4	6	6	6	5
2016	618	7	4	4	8	3	7	4	7	9	5	5	6	2	6	6	6	6
2016	619	7	4	5	6	6	10	4	8	8	5	4	5	3	6	6	5	11
2016	620	7	4	0	7	3	7	4	7	9	7	3	5	4	9	5	6	6
2016	621	7	0	4	7	3	7	4	7	9	5	5	6	3	5	0	6	6
2016	622	7	4	4	7	4	7	3	7	9	5	4	5	4	5	6	4	2
2016	623	7	4	4	7	3	7	3	6	9	5	3	5	4	6	6	4	1
2016	624	7	4	5	6	6	8	4	8	10	4	4	5	5	8	6	6	8
2016	625	7	4	5	6	6	6	0	8	10	4	4	5	5	11	0	0	7
2016	626	0	0	4	7	3	7	4	8	11	7	0	0	4	9	9	6	6
2016	627	7	0	5	6	6	9	4	8	8	5	4	5	3	6	6	5	0
2016	628	7	4	5	6	6	8	2	8	9	5	4	5	5	5	0	6	8
2016	629	7	4	3	7	3	7	3	7	8	7	5	3	4	6	6	5	5
2016	630	7	4	4	7	3	7	4	7	9	7	3	5	4	7	6	5	6
2016	631	7	4	4	7	3	7	4	7	9	7	3	5	4	11	6	6	6
2016	632	7	3	5	6	6	8	4	2	9	4	4	0	3	9	6	6	12
2016	633	7	2	4	6	3	7	3	7	9	7	4	0	0	6	0	4	6
2016	634	6	4	5	6	3	10	4	8	8	5	4	5	3	6	6	0	10
2016	635	7	4	5	6	6	10	4	9	8	5	4	0	3	6	0	5	11
2016	636	7	4	4	7	3	7	0	7	9	0	5	6	4	9	0	0	5
2016	637	6	4	5	6	2	10	0	8	8	5	4	5	1	9	7	5	10
2016	638	7	4	4	7	3	7	4	7	9	7	3	5	4	6	0	3	5
2016	639	7	4	5	6	6	7	4	3	9	4	4	5	5	9	6	7	12
2016	640	7	4	5	6	3	7	0	7	9	5	5	0	4	6	0	0	1
2016	641	7	3	4	7	3	7	3	8	7	5	3	4	8	6	0	4	13
2016	642	7	4	5	6	5	8	0	8	9	5	3	5	3	9	9	0	7
2016	643	7	3	4	6	3	7	3	8	7	4	4	6	3	6	0	4	1
2016	644	4	4	4	7	3	7	3	7	9	5	3	5	0	6	8	4	4
2016	645	7	4	5	6	5	8	0	8	9	5	3	5	3	11	0	0	7
2016	646	6	0	4	7	3	7	0	9	11	4	4	5	3	6	4	0	1
2016	647	7	4	4	7	3	7	4	7	10	5	8	5	0	6	4	5	4
2016	648	7	4	4	7	3	7	4	7	0	7	3	0	4	6	10	6	6
2017	649	7	4	2	7	6	10	4	7	8	1	4	8	3	5	6	5	10
2017	650	7	4	4	7	3	7	0	7	9	5	6	7	5	0	0	5	1
2017	651	7	4	4	0	3	7	0	7	9	5	7	7	5	9	6	0	5
2017	652	6	3	5	6	0	10	0	8	8	5	4	6	3	6	0	5	10
2017	653	7	4	4	7	3	7	3	7	8	7	5	7	4	9	4	4	1
2017	654	7	4	4	7	6	6	0	7	10	5	5	7	0	0	6	0	6
2017	655	7	4	4	7	3	7	4	7	9	5	7	0	5	9	6	6	5
2017	656	7	4	5	6	3	8	4	3	10	4	6	0	5	7	9	6	14
2017	657	7	4	4	7	3	7	0	7	8	7	3	5	4	9	7	6	6
2017	658	7	4	4	7	3	7	5	7	9	5	5	7	4	0	7	0	5
2017	659	7	4	4	7	3	7	0	7	9	5	7	7	4	9	6	0	6
2017	660	7	4	4	7	3	7	4	7	8	5	6	0	4	0	0	6	5
2017	661	7	4	4	7	5	7	3	0	9	1	5	4	4	5	6	4	3
2017	662	7	4	5	6	6	8	3	8	9	4	4	6	5	6	0	6	7
2017	663	7	2	5	6	3	8	0	8	9	5	3	6	5	6	0	0	7
2017	664	7	4	5	6	3	6	0	8	10	4	4	6	5	6	6	0	7
2017	665	7	4	5	6	3	10	4	8	8	5	4	7	3	6	6	5	11
2017	666	7	4	4	7	6	7	4	7	9	5	4	7	4	13	6	6	5
2017	667	7	4	4	7	6	7	3	7	10	5	3	6	4	9	4	4	1
2017	668	7	0	5	6	3	8	4	3	0	4	4	0	5	6	4	0	6
2017	669	7	4	5	6	3	6	6	8	10	4	4	6	6	6	3	5	7
2017	670	7	4	5	6	3	8	4	0	7	1	4	6	0	6	9	6	7
2017	671	7	4	4	7	6	7	0	7	8	5	6	7	3	10	6	6	11
2017	672	7	4	4	7	6	7	0	8	9	5	6	7	3	9	0	6	5
2017	673	7	4	4	7	6	7	4	7	7	7	3	6	4	11	5	0	6
2017	674	7	4	4	7	3	7	4	7	9	5	7	9	4	11	0	0	5
2017	675	7	4	4	7	4	7	4	7	9	5	6	7	4	11	4	6	5
2017	676	7	4	4	7	6	7	0	7	9	5	4	6	4	11	6	6	5
2017	677	7	4	5	6	1	8	0	4	9	4	4	6	5	6	7	6	10
2017	678	7	4	4	7	3	7	4	7	9	7	3	7	4	11	5	0	5
2017	679	7	4	4	7	3	7	4	7	9	7	3	7	4	9	6	6	6
2017	680	7	3	0	6	6	8	3	2	9	4	4	0	5	6	9	6	1
2017	681	7	4	4	7	3	7	3	8	8	7	6	3	4	5	4	4	4
2017	682	7	4	4	8	3	7	0	7	9	5	2	5	4	9	4	6	3
2017	683	7	4	5	6	3	6	5	8	10	4	5	6	5	6	0	5	5
2017	684	7	4	4	7	3	7	0	7	9	7	3	5	4	12	4	6	6
2017	685	7	4	5	6	3	8	4	3	9	5	4	6	5	6	10	6	11
2017	686	7	4	4	7	6	6	3	3	10	5	4	5	5	6	3	5	4
2017	687	7	4	4	7	3	7	0	7	9	5	8	6	4	6	0	6	5
2017	688	7	4	5	0	3	7	4	7	9	7	3	5	4	9	6	5	6
2017	689	0	3	5	6	3	7	4	8	9	1	4	6	3	6	6	0	4
2017	690	7	0	4	6	5	8	0	8	9	5	4	5	3	11	4	0	14
2017	691	0	4	6	6	2	7	4	0	9	1	3	5	0	9	0	4	6
2017	692	7	4	4	6	3	7	0	7	10	5	3	5	5	11	0	0	1
2017	693	7	4	4	0	3	7	4	7	10	5	7	6	3	6	5	6	1
2017	694	7	4	4	7	2	7	0	6	9	5	3	6	3	6	0	0	1
2017	695	7	4	4	7	3	7	4	7	10	5	4	6	3	11	0	0	4
2018	696	7	4	4	7	3	7	0	7	10	7	4	7	5	9	7	0	4
2018	697	7	4	4	7	6	7	0	7	9	7	3	0	4	11	4	8	6
2018	698	7	0	5	6	3	6	4	9	10	4	4	0	5	6	0	5	7
2018	699	7	4	4	7	3	7	0	7	8	7	5	3	4	5	6	0	1
2018	700	7	4	0	7	3	7	4	7	9	5	6	8	1	9	0	0	5
2018	701	7	4	4	7	3	7	5	7	9	5	4	6	4	13	7	0	5
2018	702	7	4	4	7	3	6	3	7	9	5	2	6	4	9	6	4	6
2018	703	7	0	4	7	3	7	3	8	7	5	3	8	3	9	0	4	8
2018	704	7	4	3	7	6	7	0	7	9	7	5	5	4	5	6	0	1
2018	705	7	4	4	7	3	7	4	7	9	6	3	6	4	11	6	4	5
2018	706	7	4	4	7	3	7	4	7	9	5	6	8	4	5	5	6	2
2018	707	7	0	4	7	3	7	0	7	8	5	6	7	5	10	6	6	5
2018	708	7	4	4	7	3	7	0	7	10	7	6	0	5	10	4	0	5
2018	709	7	0	4	7	3	7	3	7	9	7	6	7	5	9	0	4	0
2018	710	7	4	5	6	3	10	0	8	8	5	4	7	3	6	5	0	8
2018	711	7	4	4	7	7	7	3	7	10	5	3	8	4	0	0	4	2
2018	712	7	4	4	7	7	7	3	7	8	7	5	5	4	5	4	4	1
2018	713	7	4	4	7	3	7	0	7	9	7	7	8	5	11	7	5	5
2018	714	7	4	4	7	3	7	3	7	9	5	4	6	4	9	6	0	13
2018	715	7	2	5	6	3	8	0	8	10	5	4	6	6	6	0	3	7
2018	716	7	0	5	6	6	6	4	8	10	4	5	7	5	6	6	5	0
2018	717	7	4	5	6	3	6	0	8	9	4	4	7	4	6	6	6	7
2018	718	7	4	5	6	3	6	4	8	10	4	4	6	5	6	0	0	10
2018	719	7	4	4	7	3	7	3	7	9	5	5	6	4	9	4	5	2
2018	720	7	4	5	6	6	7	3	3	9	4	4	5	5	6	5	0	12
2018	721	7	4	4	7	3	7	0	7	9	7	3	5	4	6	0	0	5
2018	722	6	0	4	7	3	7	4	7	7	5	0	0	4	11	5	6	5
2018	723	7	0	5	6	5	8	4	7	9	5	4	5	5	6	4	4	0
2018	724	7	3	4	6	3	7	3	8	7	4	4	6	3	6	0	4	1
2018	725	6	4	4	7	3	7	0	8	10	4	4	4	3	11	0	0	1
2018	726	7	4	5	6	5	8	2	8	9	5	3	5	3	6	0	7	7
2018	727	7	4	5	6	6	8	3	8	9	4	4	5	5	6	9	7	7
2018	728	7	2	0	6	4	7	4	7	9	5	3	5	5	6	5	0	7
2018	729	7	4	4	6	3	6	3	8	0	4	4	4	0	9	1	4	0
2018	730	7	4	5	6	6	10	4	8	8	5	4	5	3	10	6	0	11
2018	731	7	4	4	7	3	7	4	7	9	5	4	7	3	6	4	6	5
2018	732	7	4	5	6	6	8	2	8	9	5	6	5	7	7	4	0	8
2018	733	6	3	4	0	3	7	3	7	10	5	5	5	6	6	5	5	1
2018	734	7	4	5	6	3	7	4	0	9	5	4	5	3	11	10	0	4
2018	735	7	4	4	7	3	7	3	7	8	5	3	5	3	6	7	0	4

## Sheet: He
Population Statistics
Population	Sample size	Loci typed	Unbiased Hz	Unbiased Hz SD	Obs Hz	Obs Hz SD	No Alleles	No Alleles SD
2008NonOmani	55	17	0.606501	0.049335	N/A	N/A	5.58824	1.93839
2008Omani	77	17	0.582075	0.0535828	N/A	N/A	5.94118	2.2768
2009NonOmani	57	17	0.570224	0.0530848	N/A	N/A	5.52941	2.09516
2009Omani	93	17	0.593154	0.0520699	N/A	N/A	6.29412	2.41777
2010NonOmani	16	17	0.527505	0.0594731	N/A	N/A	3.41176	1.41681
2010Omani	22	17	0.581598	0.0534926	N/A	N/A	4.41176	1.73417
2011NonOmani	30	13	0.523867	0.0718667	N/A	N/A	4.30769	1.70219
2011Omani	27	13	0.520515	0.0815292	N/A	N/A	3.76923	1.73944
2012NonOmani	27	17	0.571182	0.0552293	N/A	N/A	4.23529	1.71499
2012Omani	53	17	0.579247	0.0603872	N/A	N/A	5.52941	2.32157
2013NonOmani	41	17	0.582014	0.0572422	N/A	N/A	5.29412	1.75943
2013Omani	45	17	0.570676	0.0506192	N/A	N/A	4.70588	1.57181
2014NonOmani	16	17	0.643167	0.0409562	N/A	N/A	4.23529	1.34766
2014Omani	10	17	0.630299	0.056985	N/A	N/A	3.58824	1.41681
2015NonOmani	14	17	0.617991	0.060048	N/A	N/A	3.64706	1.41161
2015Omani	15	17	0.625609	0.0438188	N/A	N/A	3.94118	1.59963
2016NonOmani	25	17	0.591041	0.0407165	N/A	N/A	4.41176	1.80481
2016Omani	25	17	0.591722	0.0446008	N/A	N/A	4.47059	1.77192
2017NonOmani	22	17	0.551092	0.0552514	N/A	N/A	3.82353	1.70423
2017Omani	25	17	0.609678	0.0488941	N/A	N/A	4.58824	1.73417
2018NonOmani	26	17	0.586718	0.0523581	N/A	N/A	4.41176	2.03282
2018Omani	14	17	0.617615	0.0450335	N/A	N/A	3.76471	1.30045
