# Supplementary material for: Spatiotemporal dynamics of Mycobacterium Tuberculosis in Oman
Source: Research Square preprint supplement (doi:10.21203/rs.3.rs-7400763/v1), 2025-09-29
Supplement: Supplementary file 2 [file f29d08a7b133702070d29b9f.xlsx]

## Sheet: Sheet1
SRA_NUMBER	CODE_NAME
ERR3077970	Tanzania_1
ERR3077932	Tanzania_2
ERR3077943	Tanzania_3
ERR3077945	Tanzania_4
ERR3077951	Tanzania_5
SRR19428519	Tanzania_6
SRR19428520	Tanzania_7
SRR19428521	Tanzania_8
SRR19428522	Tanzania_9
SRR19428523	Tanzania_10
SRR19428524	Tanzania_11
SRR19428528	Tanzania_12
SRR19428529	Tanzania_13
SRR19428530	Tanzania_14
SRR19428531	Tanzania_15
SRR19428532	Tanzania_16
SRR19428533	Tanzania_17
SRR19428534	Tanzania_18
SRR19428535	Tanzania_19
SRR19428540	Tanzania_20
SRR19428541	Tanzania_21
SRR19428542	Tanzania_22
SRR19428543	Tanzania_23
SRR19428544	Tanzania_24
SRR19355747	Tanzania_25
SRR19357411	Tanzania_26
ERR4553988	Bangladesh_1
ERR4553989	Bangladesh_2
ERR4553990	Bangladesh_3
ERR4553992	Bangladesh_4
ERR4553995	Bangladesh_5
ERR4553954	Bangladesh_6
ERR4553959	Bangladesh_7
ERR4553960	Bangladesh_8
ERR4553964	Bangladesh_9
ERR4553970	Bangladesh_10
ERR4553972	Bangladesh_11
ERR4553974	Bangladesh_12
ERR4553975	Bangladesh_13
ERR4553976	Bangladesh_14
ERR4553977	Bangladesh_15
ERR4553979	Bangladesh_16
ERR4553980	Bangladesh_17
ERR4553982	Bangladesh_18
ERR4553983	Bangladesh_19
ERR4553984	Bangladesh_20
ERR4553985	Bangladesh_21
ERR4553986	Bangladesh_22
ERR4553987	Bangladesh_23
ERR4553993	Bangladesh_24
ERR9891954	FR_2
ERR9891960	FR_1
ERR9891961	FR_3
ERR9891962	FR_4
ERR9891963	FR_5
ERR9891964	FR_6
ERR9891965	FR_7
ERR9891966	FR_8
ERR9891967	FR_9
ERR9891969	FR_10
ERR9891971	FR_11
ERR9891972	FR_12
ERR9891974	FR_13
ERR9891976	FR_14
ERR9891978	FR_15
SRR25786916	ET_1
SRR26800435	ET_2
SRR26800436	ET_3
SRR26800438	ET_4
SRR26800444	ET_5
SRR26800451	ET_6
SRR26800454	ET_7
SRR26800455	ET_8
SRR26800462	ET_9
SRR26800463	ET_10
SRR26800467	ET_11
SRR26800468	ET_12
SRR26800471	ET_13
SRR26800477	ET_14
SRR26800479	ET_15
SRR26800482	ET_16
SRR26800483	ET_17
SRR26800485	ET_18
SRR26800486	ET_19
SRR26800488	ET_20
SRR26800491	ET_21
SRR26800492	ET_22
SRR26800493	ET_23
SRR27785104	Egypt_1
SRR27785105	Egypt_2
SRR5338522	Philippines_1
SRR5338519	Philippines_2
SRR5338518	Philippines_3
SRR5338520	Philippines_4
SRR5338521	Philippines_5
SRR5338513	Philippines_6
SRR5338514	Philippines_7
SRR5338515	Philippines_8
SRR5338516	Philippines_9
SRR5338517	Philippines_10
SRR14088348	Pakistan_1
SRR14088393	Pakistan_2
SRR11638839	Pakistan_3
SRR8552928	Pakistan_4
SRR14088364	Pakistan_5
SRR14088365	Pakistan_6
SRR8552927	Pakistan_7
SRR8552928	Pakistan_8
SRR8552929	Pakistan_9
SRR8552930	Pakistan_10
SRR8552931	Pakistan_11
SRR8552932	Pakistan_12
SRR8552933	Pakistan_13
SRR8552934	Pakistan_14
SRR8552935	Pakistan_15
SRR24114342	Pakistan_16
SRR24114343	Pakistan_17
SRR24114344	Pakistan_18
SRR24114345	Pakistan_19
SRR24114346	Pakistan_20
SRR24114353	Pakistan_21
SRR24114354	Pakistan_22
SRR24114355	Pakistan_23
SRR24114356	Pakistan_24
SRR24114357	Pakistan_25
SRR24114364	Pakistan_26
SRR24114365	Pakistan_27
SRR15465758	India_1
SRR15364447	India_2
SRR15506912	India_3
SRR10695721	India_5
SRR15222187	India_4
SRR15506895	India_6
SRR15465759	India_7
SRR15465760	India_8
SRR15465761	India_9
SRR15465775	India_10
SRR15465771	India_11
SRR15465777	India_12
SRR15465778	India_13
SRR15465779	India_14
SRR15506908	India_15
SRR15506909	India_16
SRR15506900	India_17
SRR15506911	India_18
SRR15364436	India_19
SRR15364442	India_20
SRR15364443	India_21
SRR15364444	India_22
SRR15364441	India_23
SRR15364445	India_24
ERR4553953	Bangladesh_25
ERR4553971	Bangladesh_26
ERR4553978	Bangladesh_27
ERR4553981	Bangladesh_28
ERR4553991	Bangladesh_29
ERR4553996	Bangladesh_30
